# Supplementary material for: Quantum Tunneling Facilitates Water Motion across the Surface of Phenanthrene
Source: PubMed Central journal article supplement (PMC10416304; doi:10.1021/jacs.3c04281), 2023-07-26
Supplement: ja3c04281_si_001.pdf [file ja3c04281_si_001.pdf]

# Supplementary materials for:

## Quantum tunnelling facilitates the water motion across the surface of phenanthrene

Donatella Loru <sup>[a]</sup>, Amanda L. Steber <sup>[a] [†]</sup>, Cristóbal Pérez <sup>[a] [†]</sup>, Daniel A. Obenchain <sup>[a] [‡]</sup>, Berhane Temelso <sup>[b]</sup>, Juan C. López <sup>[c]</sup> and Melanie Schnell. <sup>\*[a] [d]</sup>

[a] Deutsches Elektronen-Synchrotron DESY, Notkestr. 85, 22607 Hamburg, Germany

[b] Division of Information Technology, College of Charleston, Charleston, SC 29424, USA

[c] Departamento de Química Física y Química Inorgánica, Facultad de Ciencias, Universidad de Valladolid, 47011 Valladolid, Spain

[d] Institut für Physikalische Chemie, Christian-Albrechts-Universität zu Kiel, Max-Eyth-Straße 1, D-24118 Kiel, Germany

[†] Current address: Departamento de Química Física y Química Inorgánica, Facultad de Ciencias, Universidad de Valladolid, 47011 Valladolid, Spain

[‡] Current address: Georg-August-Universität Göttingen, Institut für Physikalische Chemie, 37077 Göttingen, Germany

### Table of Contents

|            |                                                         |           |
|------------|---------------------------------------------------------|-----------|
| <b>S1.</b> | <b>Experimental methods</b> .....                       | <b>2</b>  |
| <b>S2.</b> | <b>Theoretical results</b> .....                        | <b>2</b>  |
| <b>S3.</b> | <b>Phenanthrene – H<sub>2</sub>O</b> .....              | <b>3</b>  |
| <b>S4.</b> | <b>Phenanthrene – H<sub>2</sub><sup>18</sup>O</b> ..... | <b>4</b>  |
| <b>S5.</b> | <b>Phenanthrene – D<sub>2</sub>O</b> .....              | <b>6</b>  |
| <b>S6.</b> | <b>Phenanthrene – HDO</b> .....                         | <b>8</b>  |
| <b>S7.</b> | <b>Meyer’s flexible model</b> .....                     | <b>10</b> |
| <b>S8.</b> | <b>List of transitions</b> .....                        | <b>15</b> |

## S1. Experimental methods

The rotational spectrum of the Phe-H<sub>2</sub>O cluster was recorded in the 2-8 GHz frequency range using the CP-FTMW spectrometer COMPACT, which has been reported previously.[1][2] The sample of Phe (C<sub>14</sub>H<sub>10</sub>, 98% purity) was purchased from Sigma Aldrich and used without any further purification. It appears as a white/yellowish powder with a tabulated melting point of 101°C. To increase the concentration of phenanthrene in the gas phase, the sample was heated to a temperature of ca. 130-135 °C by using a heatable reservoir situated at the orifice of a modified pulsed valve (Parker General Valve, Series 9). The Phe-H<sub>2</sub>O complex was formed by introducing water via an external reservoir directly connected to the one containing phenanthrene and positioned inside the vacuum chamber. The Phe-H<sub>2</sub><sup>18</sup>O and Phe-D<sub>2</sub>O isotopologues were formed by using an isotopically enriched sample of H<sub>2</sub><sup>18</sup>O and D<sub>2</sub>O, respectively. The Phe-HDO complex was formed by using a 1:1 mixture of H<sub>2</sub>O and D<sub>2</sub>O, since this mixture is known to undergo fast proton exchange.

In the COMPACT spectrometer, the supersonic jet is created by streamlining the carrier gas neon, used at a backing pressure of ca. 3.5 bar, first through the external reservoir containing water and then through the reservoir just close to the valve orifice containing the sample of phenanthrene. Once created, the supersonic jet is probed by a 4 μs long microwave chirped pulse spanning 2–8 GHz, which is generated by an arbitrary waveform generator. Before being broadcasted into the vacuum chamber by a horn antenna, the chirped pulse is amplified by a travelling wave tube amplifier. The interaction of the chirped pulse with the internally cold molecules in the supersonic jet can produce a molecular polarization, which occurs when at least one of the frequencies of the chirped pulse is resonant with a rotational transition of the probed molecules. The polarization is followed by molecular relaxation which produces emission signal. The latter is then recorded by a receiving horn antenna, amplified using a low noise amplifier and digitized in the time domain, using a fast oscilloscope. The signal in the time domain is then converted to the frequency domain by Fast Fourier transformation. The repetition rate of the experiment was set to 8 Hz; in addition, the fast frame mode of the oscilloscope was applied to all the experiments. Thus, each molecular pulse was probed by eight microwave chirped pulses, followed by eight FIDs to be recorded, thus resulting in an effective repetition rate of 64 Hz.

## S2. Theoretical results

**Table S1** Theoretical rotational constants and dipole moment components of the three unique isomers of the phenanthrene-H<sub>2</sub>O complex calculated at the PBEh-3c level of theory and relative single-point energies calculated at the DLPNO-CCSD(T) level of theory.

|                       | far-right/left-1 | int-right/left-1 | int-right/left-2 | sym-middle-1 | sym-middle-2 |
|-----------------------|------------------|------------------|------------------|--------------|--------------|
| <i>A</i> (MHz)        | 1080.1           | 1050.7           | 1043.5           | 1052.4       | 970.6        |
| <i>B</i> (MHz)        | 449.8            | 473.2            | 470.5            | 472.2        | 506.0        |
| <i>C</i> (MHz)        | 394.8            | 408.1            | 404.5            | 412.8        | 378.5        |
| $ \mu_a $ (D)         | 1.0              | 0.1              | 0.4              | 0.0          | 0.0          |
| $ \mu_b $ (D)         | 0.4              | 1.0              | 1.0              | 0.7          | 2.1          |
| $ \mu_c $ (D)         | 2.3              | 2.2              | 2.2              | 2.3          | 0.4          |
| $\Delta E_c$ (kJ/mol) | 0.0              | 0.0              | 0.4              | 0.4          | 0.8          |

### S3. Phenanthrene – H<sub>2</sub>O

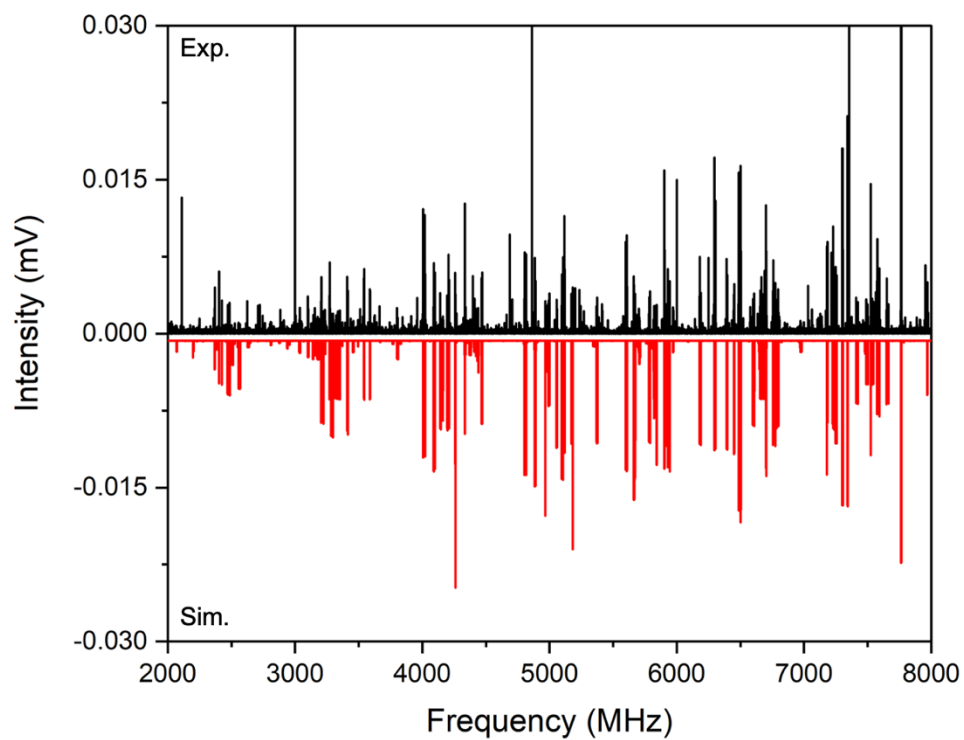

**Figure S1** Experimental (black trace) and simulated (red trace) rotational spectrum of the phenanthrene-H<sub>2</sub>O complex in the 2-8 GHz frequency range. The simulated spectrum is based on the experimental rotational constants. The experimental spectrum was initially reported in our previous study on the phenanthrene-water clusters.[3]

#### S4. Phenanthrene – H<sub>2</sub><sup>18</sup>O

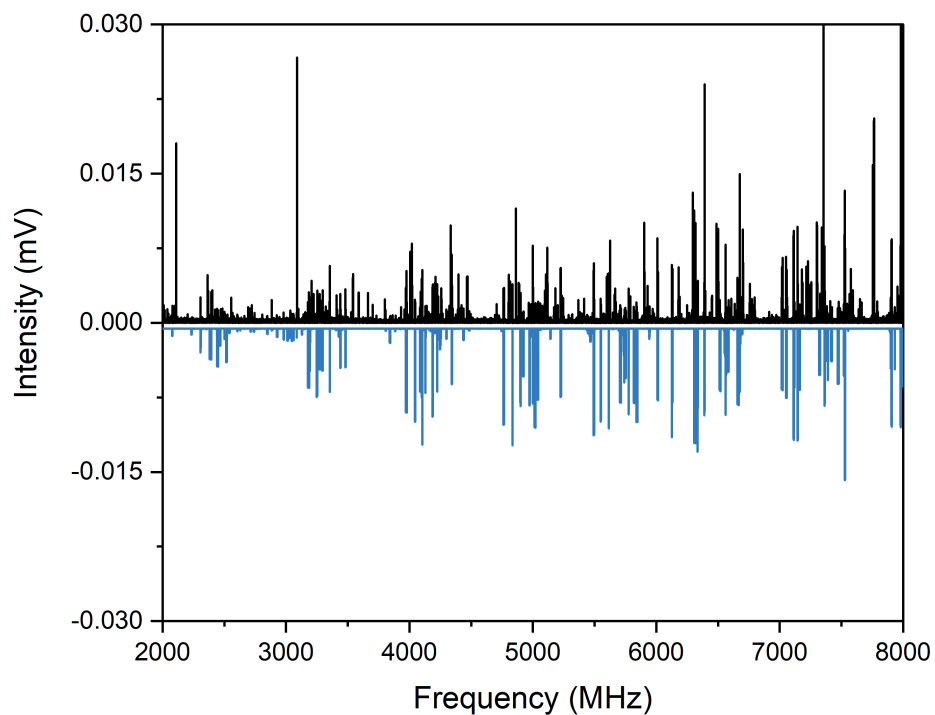

**Figure S2** Experimental (black trace) and simulated (blue trace) rotational spectrum of the phenanthrene-H<sub>2</sub><sup>18</sup>O complex in the 2-8 GHz frequency range. The simulated spectrum is based on the experimental rotational constants. The experimental spectrum was initially reported in our previous study on the phenanthrene-water clusters.[3]

**Table S2** Experimental spectroscopic constants of the far-left/-right isomer of the phenanthrene-H<sub>2</sub><sup>18</sup>O complex. The experimental rotational transitions were fitted using the two-states coupled rotational Hamiltonian as for the parent species.

|                                         | <b>0<sup>+</sup></b>      | <b>1<sup>+</sup></b> | <b>0<sup>-</sup></b> | <b>1<sup>-</sup></b> |
|-----------------------------------------|---------------------------|----------------------|----------------------|----------------------|
| <i>A</i> (MHz) <sup>a</sup>             | 1013.434(39) <sup>g</sup> | 1013.428(39)         | 1013.217(35)         | 1013.211(35)         |
| <i>B</i> (MHz)                          | 431.03802(87)             | 430.32752(92)        | 431.06082(68)        | 430.45643(61)        |
| <i>C</i> (MHz)                          | 391.307(39)               | 391.296(39)          | 391.150(35)          | 391.141(35)          |
| <i>D<sub>J</sub></i> (kHz) <sup>b</sup> | 2.421(43)                 | 0.3740(76)           | 2.094(31)            | 0.3302(59)           |
| <i>D<sub>K</sub></i> (kHz)              | -                         | -1.383(29)           | -                    | -1.267(24)           |
| <i>D<sub>JK</sub></i> (kHz)             | -4.77(11)                 | -1.214(41)           | -3.957(77)           | -0.909(30)           |
| <i>d<sub>1</sub></i> (kHz)              | -                         | 1.263(24)            | -                    | 1.092(17)            |
| <i>d<sub>2</sub></i> (kHz)              | -0.1067(29)               | 0.1299(35)           | -0.0908(22)          | 0.1169(24)           |
| $\Delta_{0+1+}$ (MHz) <sup>c</sup>      |                           |                      | 7.4209(65)           |                      |
| $\Delta_{0-1-}$ (MHz)                   |                           |                      | 6.3549(52)           |                      |
| <i>F<sub>b</sub></i> (MHz) <sup>d</sup> | 48.75(25)                 |                      | 47.87(22)            |                      |
| <i>F<sub>bJ</sub></i> (MHz)             | -0.01686(42)              |                      | -0.01472(32)         |                      |
| <i>N</i> <sup>e</sup>                   |                           |                      | 375                  |                      |
| $\sigma$ (kHz) <sup>f</sup>             |                           |                      | 10.4                 |                      |

<sup>a</sup>*A*, *B*, and *C* are the rotational constants. <sup>b</sup>*D<sub>J</sub>*, *D<sub>K</sub>*, *D<sub>JK</sub>*, *d<sub>1</sub>*, and *d<sub>2</sub>* are the centrifugal distortion constants. <sup>c</sup> $\Delta_{0+1+}$  and  $\Delta_{0-1-}$  are the differences in vibrational energy between the two tunnelling states 0<sup>+</sup> and 1<sup>+</sup> and 0<sup>-</sup> and 1<sup>-</sup>, respectively. <sup>d</sup>*F<sub>b</sub>* and *F<sub>bJ</sub>* are the Coriolis coupling terms. <sup>e</sup>*N* is the number of lines in the fit. <sup>f</sup> $\sigma$  is the root-mean-square deviation of the fit. <sup>g</sup>Standard error within parentheses are expressed in units of the last two digits.

### S5. Phenanthrene – D<sub>2</sub>O

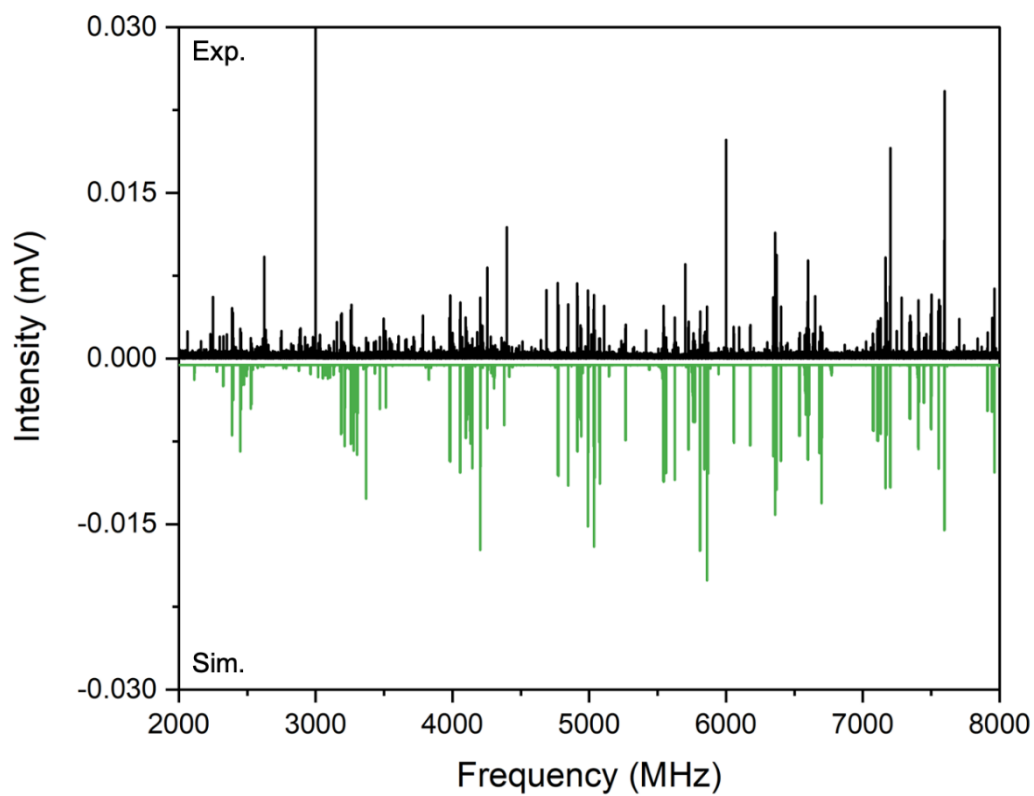

**Figure S3** Experimental (black trace) and simulated (green trace) rotational spectrum of the phenanthrene-D<sub>2</sub>O complex in the 2-8 GHz frequency range. The simulated spectrum is based on the experimental rotational constants. The experimental spectrum of phenanthrene-D<sub>2</sub>O is reported for the first time in this study.

**Table S3** Experimental spectroscopic constants of the far-left/-right isomer of the phenanthrene-D<sub>2</sub>O complex. The experimental rotational transitions were fitted using the two-states coupled rotational Hamiltonian as for the parent species.

|                                         | <b>0<sup>+</sup></b>      | <b>1<sup>+</sup></b> | <b>0<sup>-</sup></b> | <b>1<sup>-</sup></b> |
|-----------------------------------------|---------------------------|----------------------|----------------------|----------------------|
| <i>A</i> (MHz) <sup>a</sup>             | 1023.203(70) <sup>g</sup> | 1023.194(70)         | 1023.279(70)         | 1023.272(70)         |
| <i>B</i> (MHz)                          | 433.15839(73)             | 432.70053(78)        | 433.15815(75)        | 432.68489(79)        |
| <i>C</i> (MHz)                          | 391.260(70)               | 391.253(70)          | 391.319(70)          | 391.312(70)          |
| <i>D<sub>J</sub></i> (kHz) <sup>b</sup> | 1.604(40)                 | 0.2952(77)           | 1.623(42)            | 0.2719(77)           |
| <i>D<sub>K</sub></i> (kHz)              | -                         | -1.216(74)           | -                    | -1.227(72)           |
| <i>D<sub>JK</sub></i> (kHz)             | -2.78(11)                 | -0.510(51)           | -2.86(11)            | -0.499(49)           |
| <i>d<sub>1</sub></i> (kHz)              | -                         | 0.813(22)            | -                    | 0.839(24)            |
| <i>d<sub>2</sub></i> (kHz)              | -0.0657(30)               | 0.0923(33)           | -0.0640(31)          | 0.0983(34)           |
| $\Delta_{0+1+}$ (MHz) <sup>c</sup>      |                           |                      | 5.0676(66)           |                      |
| $\Delta_{0-1-}$ (MHz)                   |                           |                      | 5.2246(57)           |                      |
| <i>F<sub>b</sub></i> (MHz) <sup>d</sup> |                           | 46.37(47)            |                      | 46.58(47)            |
| <i>F<sub>bJ</sub></i> (MHz)             |                           | -0.01164(45)         |                      | -0.01165(47)         |
| <i>N</i> <sup>e</sup>                   |                           |                      | 248                  |                      |
| $\sigma$ (kHz) <sup>f</sup>             |                           |                      | 9.3                  |                      |

<sup>a</sup>*A*, *B*, and *C* are the rotational constants. <sup>b</sup>*D<sub>J</sub>*, *D<sub>K</sub>*, *D<sub>JK</sub>*, *d<sub>1</sub>*, and *d<sub>2</sub>* are the centrifugal distortion constants. <sup>c</sup> $\Delta_{0+1+}$  and  $\Delta_{0-1-}$  are the differences in vibrational energy between the two tunnelling states 0<sup>+</sup> and 1<sup>+</sup> and 0<sup>-</sup> and 1<sup>-</sup>, respectively. <sup>d</sup>*F<sub>b</sub>* and *F<sub>bJ</sub>* are the Coriolis coupling terms. <sup>e</sup>*N* is the number of lines in the fit. <sup>f</sup> $\sigma$  is the root-mean-square deviation of the fit. <sup>g</sup>Standard error within parentheses are expressed in units of the last two digits.

## S6. Phenanthrene – HDO

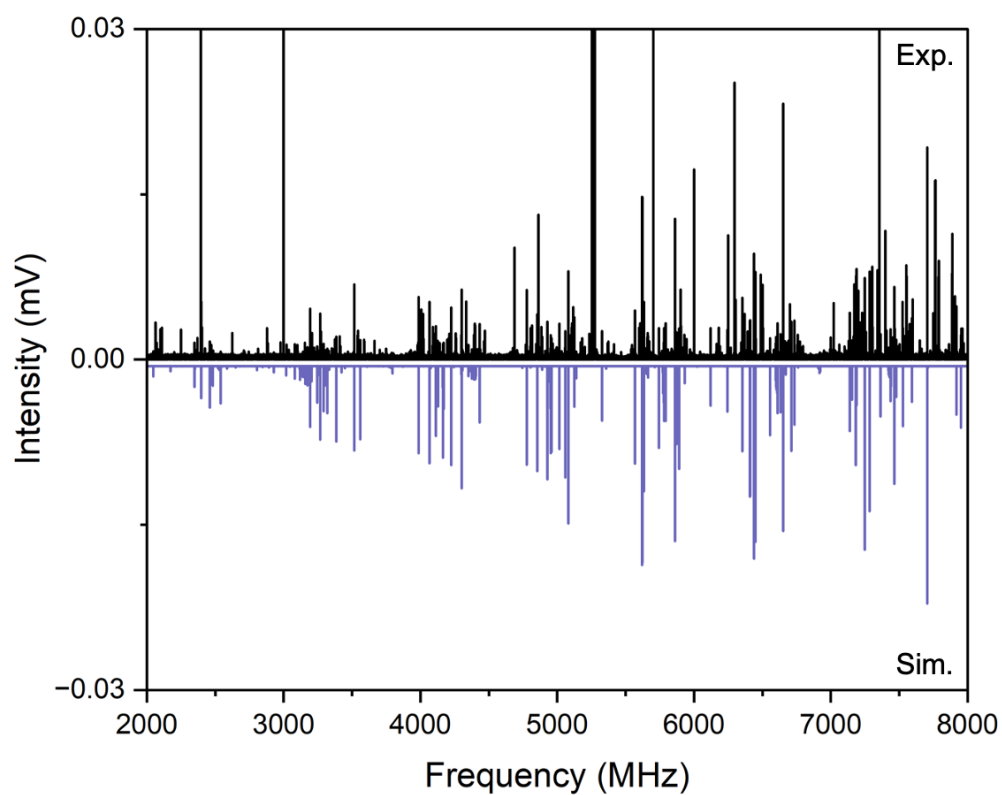

**Figure S4** Experimental (black trace) and simulated (violet trace) rotational spectrum of the phenanthrene-HDO complex in the 2-8 GHz frequency range. The simulated spectrum is based on the experimental rotational constants. The experimental spectrum of phenanthrene-HDO is reported for the first time in this study.



**Table S4** Experimental spectroscopic constants of the far-left/-right isomer of the phenanthrene-HDO complex. The experimental rotational transitions were fitted using the two-states coupled rotational Hamiltonian as for the parent species.

|                                    | $0^+$                     | $1^-$                   | $0^-$         | $1^+$                   |
|------------------------------------|---------------------------|-------------------------|---------------|-------------------------|
| $A$ (MHz) <sup>a</sup>             | 1037.361(47) <sup>g</sup> | [1037.361] <sup>h</sup> | 1037.365(47)  | [1037.365] <sup>i</sup> |
| $B$ (MHz)                          | 435.68171(34)             | 435.66391(30)           | 435.68597(33) | 435.66749(31)           |
| $C$ (MHz)                          | 392.253(47)               | [392.253]               | 392.251(47)   | [392.251]               |
| $D_J$ (kHz) <sup>b</sup>           |                           | 0.1045(15)              |               |                         |
| $D_K$ (kHz)                        |                           | 0.458(27)               |               |                         |
| $D_{JK}$ (kHz)                     | 0.8226(75)                | [0.8226]                | 0.8225(75)    | [0.8225]                |
| $d_1$ (kHz)                        |                           | -0.0081(10)             |               |                         |
| $d_2$ (kHz)                        |                           | 0.01543(80)             |               |                         |
| $\Delta_{0+1-}$ (MHz) <sup>c</sup> |                           | 0.2464(27)              |               |                         |
| $\Delta_{0-1+}$ (MHz)              |                           | 0.2297(26)              |               |                         |
| $F_b$ (MHz) <sup>d</sup>           |                           | 53.21(28)               |               | 53.21(28)               |
| $N$ <sup>e</sup>                   |                           |                         | 406           |                         |
| $\sigma$ (kHz) <sup>f</sup>        |                           |                         | 9.8           |                         |

<sup>a</sup> $A$ ,  $B$ , and  $C$  are the rotational constants. <sup>b</sup> $D_J$ ,  $D_K$ ,  $D_{JK}$ ,  $d_1$ , and  $d_2$  are the centrifugal distortion constants. <sup>c</sup> $\Delta_{0+1-}$  and  $\Delta_{0-1+}$  are the differences in vibrational energy between the two tunnelling states  $0^+$  and  $1^+$  and  $0^-$  and  $1^-$ , respectively. <sup>d</sup> $F_b$  is the Coriolis coupling terms. <sup>e</sup> $N$  is the number of lines in the fit. <sup>f</sup> $\sigma$  is the root-mean-square deviation of the fit. <sup>g</sup>Standard error within parentheses are expressed in units of the last two digits. <sup>h</sup> $V$  value fixed to the one of the  $0^+$  tunnelling state. <sup>i</sup> $V$  value fixed to the one of the  $0^-$  tunnelling state.

## S7. Meyer's flexible model

The water's internal dynamics observed in the phenanthrene-H<sub>2</sub>O complex has been assessed by applying the Meyer's flexible model, which is generally used to determine the potential energy surface from rotational and vibrational experimental data[4]. This model describes the intramolecular motion as a function of one structural parameter selected as an independent variable. The rest of the parameters, instead of remaining fixed, can vary as a function of the independent variable.

In the case of the phenanthrene-water complex, we selected the angle  $\tau$  as the independent variable to describe the translational motion of the water molecule with respect to the substrate phenanthrene (Figure S5). To correctly describe the motion as a function of  $\tau$ , we defined five dummy atoms as illustrated in Figure S7.

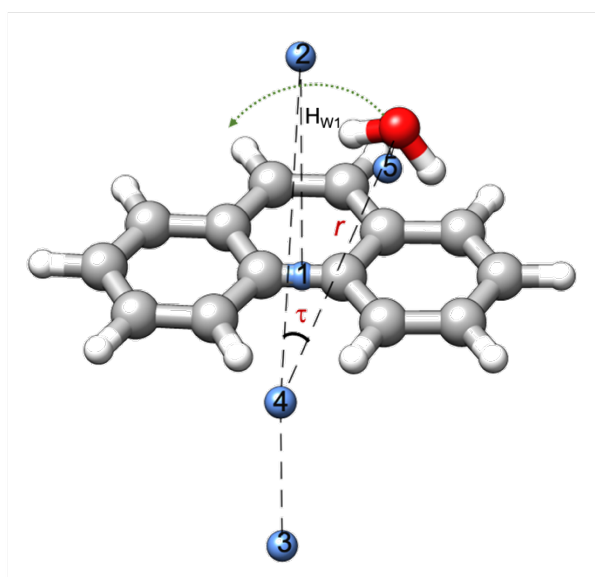

**Figure S5** Schematic representation of the dummy atoms defined to describe the translation of the water molecule in the phenanthrene-H<sub>2</sub>O complex.

The one-dimensional potential energy function describing the tunnelling of the water molecule between the left and right configuration of the **far**-isomer as a function of the angle  $\tau$  was explored at the B3LYP-D3/6-311++G(2d,p) level of theory, and it was fitted to the following expression:

$$V(\tau) = U(1 - (\tau/\tau_e)^2)^2 - De^{-E\tau^2} \quad (1)$$

where  $U$  corresponds to the potential energy barrier at  $\tau = 0^\circ$  and  $\tau_e$  corresponds to the equilibrium values of the angle  $\tau$ . The second term is based on the  $D$  and  $E$  parameters, it corrects the shape of the function to give a minimum corresponding to the sym-middle geometry of the complex ( $\tau = 0^\circ$ ).

Equation 1 was used in combination with the following relaxation parameters as predicted by calculations performed at the B3LYP-D3/6-311G(d,p) level of theory: the distance  $r = \text{O-4}$ , the angle  $\beta = \text{5-O-4}$ , the dihedral  $\varepsilon = \text{5-O-4-3}$ , and the dihedral  $\gamma = \text{H}_{w1}\text{-O-5-4}$ , where the numbers denote the dummy atoms.

$$r = r_0 + r(1)e^{-r(2)\tau^2} - r(3)\tau^2 \quad (2)$$

$$\beta(^{\circ}) = 91.44 - 2.5e^{-0.025\tau^2} - 0.0144\tau^2 \quad (3)$$

$$\varepsilon = -0.3759\tau - 0.0024\tau^3 \quad (4)$$

$$\gamma = -90.0 - 1.59\tau - 45.1 \left( \frac{1}{1 + e^{-\tau}} \right) - 0.5 \quad (5)$$

The values considered for all the parameters defined above are reported in Table S5.

**Table S5** Values of the parameters utilized to describe the translation of the water molecule in the monohydrated complex of phenanthrene.

|          | <b>B3LYP-D3/6-311++G(2dp)</b> | <b>Flexible model</b>  |
|----------|-------------------------------|------------------------|
| $\tau_e$ | $\pm 13.7^\circ$              | 13.73°                 |
| <b>B</b> | 69 cm <sup>-1</sup>           | 84.34 cm <sup>-1</sup> |
| <b>C</b> | 64 cm <sup>-1</sup>           | 64 cm <sup>-1</sup>    |
| <b>D</b> | 125                           | 125                    |
| $r(0)$   | 7.199 Å                       | 7.2476                 |
| $r(1)$   | -0.0423 Å                     | 0.0                    |
| $r(2)$   | -0.025                        | 0.0                    |
| $r(3)$   | -0.00011 Å                    | 0.0                    |

When using the values of the selected relaxation parameters reported in Table S5 in Meyer's one-dimensional model, the experimental values of the rotational constants and of  $\Delta E_{0+1}$  are reproduced to a reasonable level as shown in Table S6.

**Table S6** Values of the rotational constants A, B and C in MHz and energy differences  $\Delta E_{0+1+}$  (in MHz) obtained both experimentally and from the flexible model for the water's translation motion relative to the phenanthrene substrate.

|                   | Experimental   |                |          | Flexible model |                |          |
|-------------------|----------------|----------------|----------|----------------|----------------|----------|
| Parent            | 0 <sup>+</sup> | 1 <sup>+</sup> | $\Delta$ | 0 <sup>+</sup> | 1 <sup>+</sup> | $\Delta$ |
| A                 | 1046.730(25)   | 1046.720(25)   | -0.010   | 1043.935       | 1043.935       | 0.000    |
| B                 | 440.2228(11)   | 439.1122(10)   | -1.111   | 442.115        | 441.185        | -0.935   |
| C                 | 393.590(25)    | 393.577(25)    | -0.013   | 395.805        | 395.805        | 0.000    |
| $\Delta E_{0+1+}$ | 14.0634(77)    |                |          | 14.04          |                |          |
| <sup>18</sup> O   | 0 <sup>+</sup> | 1 <sup>+</sup> | $\Delta$ | 0 <sup>+</sup> | 1 <sup>+</sup> | $\Delta$ |
| A                 | 1013.434(39)   | 1013.428(39)   | -0.005   | 1008.930       | 1008.943       | -0.013   |
| B                 | 431.03802(87)  | 430.32753(92)  | -0.710   | 432.900        | 432.265        | -0.635   |
| C                 | 391.307(39)    | 391.296(39)    | -0.011   | 393.610        | 393.605        | -0.005   |
| $\Delta E_{0+1+}$ | 7.4209(65)     |                |          | 7.78           |                |          |
| D <sub>2</sub> O  | 0 <sup>+</sup> | 1 <sup>+</sup> | $\Delta$ | 0 <sup>+</sup> | 1 <sup>+</sup> | $\Delta$ |
| A                 | 1023.203(70)   | 1023.194(70)   | -0.009   | 1019.965       | 1019.965       | 0.000    |
| B                 | 433.15839(73)  | 432.70053(78)  | -0.458   | 435.215        | 434.635        | -0.580   |
| C                 | 391.260(70)    | 391.253(70)    | -0.007   | 393.685        | 393.685        | 0.000    |
| $\Delta E_{0+1+}$ | 5.0676(66)     |                |          | 7.69           |                |          |
| HDO               | 0 <sup>+</sup> | 1 <sup>-</sup> |          |                |                |          |
| A                 | 1037.361(47)   | 1037.361(47)   | -        |                |                |          |
| B                 | 435.68171(34)  | 435.66391(30)  |          |                |                |          |
| C                 | 392.253(47)    | 392.253(47)    | -        |                |                |          |
| $\Delta E_{0+1-}$ | 0.2464(27)     |                |          |                |                |          |

To describe the internal rotation of the water around the  $C_2$  internal symmetry axis, we consider the dihedral angle  $\gamma$  as the independent variable. The one-dimensional potential energy function describing the water's internal rotation was fitted to the following function:

$$V(\gamma) = \frac{V_2(1 - \cos 2(\gamma - \gamma_e))}{2} \quad (6)$$

Considering a value of  $V_2 = 86.2 \text{ cm}^{-1}$  and  $\gamma_e = -90^\circ$ , the values of  $\Delta E_{0+}$  reported in Table S7 are obtained.

**Table S7** Values of the rotational constants A, B and C in MHz and of  $\Delta E_{0-0+}$  obtained both experimentally and from the Meyer's flexible model for the water's internal rotation motion.

| Parent            | exp            |                | Flexible model |                |                |          |
|-------------------|----------------|----------------|----------------|----------------|----------------|----------|
|                   | 0 <sup>+</sup> | 0 <sup>-</sup> | $\Delta$       | 0 <sup>+</sup> | 0 <sup>-</sup> | $\Delta$ |
| A                 | 1046.730(25)   | 1046.475(28)   | -0.255         | 1045.175       | 1045.310       | 0.135    |
| B                 | 440.2228(11)   | 440.2110(10)   | -0.0118        | 439.551        | 339.400        | -0.115   |
| C                 | 393.590(25)    | 393.467(28)    | -0.123         | 393.565        | 393.270        | -0.295   |
| $\Delta E_{0-0+}$ | -              |                | 89701.4        |                |                |          |

The combination of both translational motion and internal rotation of the water molecule was described by considering that the minimum at the vibrational coordinate at  $\tau = 13.7^\circ$  is also a minimum for the internal coordinate  $\gamma$ . This is true if:

$$\gamma - \gamma_e = \left(\frac{180}{2\tau_e}\right)(\tau - \tau_e) \quad (7)$$

and

$$\tau = \tau_e + \left(\frac{2\tau_e}{180}\right)(\gamma - \gamma_e) \quad (8)$$

In this case, the potential energy function describing the combination of the two motions can be expressed as the sum of the potential energy function describing the translation of the water (equation 1) and the one describing the internal rotation of the water (equation 6).

$$V(\tau) = U\left(1 - \left(\frac{\tau}{\tau_e}\right)^2\right)^2 - De^{-E\tau^2} + V_2\left(1 - \cos 2\left(\left(\frac{180}{2\tau_e}\right)(\tau - \tau_e)\right)\right)/2 \quad (9)$$

Considering the values obtained from the flexible model in Table S5,  $V_2 = 86.2 \text{ cm}^{-1}$  and  $\gamma_e = -90^\circ$ , we have calculated the values of the rotational constants and  $\Delta E$  for the monodeuterated complex of phenanthrene (Table S8).

**Table S8** Values of the rotational constants A, B and C in MHz and energy differences  $\Delta E_{0+1/0-1+}$  (in MHz) obtained both experimentally and from the flexible model for the water's concerted motion observed in the Phe-HDO complex.

| Experimental     |               |               |          |
|------------------|---------------|---------------|----------|
|                  | $0^+$         | $1^-$         | $\Delta$ |
| A (MHz)          | 1037.361(47)  | 1037.361(47)  | 0.00     |
| B (MHz)          | 435.68171(34) | 435.66391(30) | 0.02     |
| C (MHz)          | 392.253(47)   | 392.253(47)   | 0.00     |
| $\Delta E$ (MHz) | 0.2464(27)    |               |          |

  

| D-Bonded         | Flexible model |         |          |
|------------------|----------------|---------|----------|
|                  | $v=0$          | $v=1$   | $\Delta$ |
| A (MHz)          | 1036.16        | 1036.16 | 0.00     |
| B (MHz)          | 436.55         | 436.55  | 0.00     |
| C (MHz)          | 392.83         | 392.83  | 0.00     |
| $\Delta E$ (MHz) | 0.270          |         |          |

  

| H- Bonded        | Flexible model |          |          |
|------------------|----------------|----------|----------|
|                  | $v=0$          | $v=1$    | $\Delta$ |
| A (MHz)          | 1031.51        | 1031.505 | 0.00     |
| B (MHz)          | 437.48         | 437.485  | 0.00     |
| C (MHz)          | 394.23         | 394.235  | 0.00     |
| $\Delta E$ (MHz) | 0.16           |          |          |

## S8. List of transitions

The fitted rotational transitions have been grouped together in the following manner: first, transitions belonging to the  $R$ -branch and  $Q$ -branch have been separated. Within each branch, the  $a$ -type transitions are separated from the  $c$ -type transitions. Furthermore, we have sorted the transitions based on the lower and upper tunnelling states, namely  $0^+$ ,  $1^+$ ,  $0^-$ , and  $1^-$ .

**Table S9** Measured frequencies ( $\nu_{\text{obs}}$ ) in MHz and residuals ( $\nu_{\text{obs}} - \nu_{\text{calc}}$ ) in MHz of the rotational transitions of the parent species of Phe-H<sub>2</sub>O.

| $^a R$ -branch       |       |       |       |              |      |        |        |        |                    |                                        |
|----------------------|-------|-------|-------|--------------|------|--------|--------|--------|--------------------|----------------------------------------|
| $J$                  | $K_a$ | $K_c$ | $\nu$ | $\leftarrow$ | $J'$ | $K_a'$ | $K_c'$ | $\nu'$ | $\nu_{\text{obs}}$ | $\nu_{\text{obs}} - \nu_{\text{calc}}$ |
| $0^+ \leftarrow 1^+$ |       |       |       |              |      |        |        |        |                    |                                        |
| 3                    | 1     | 3     | $0^+$ | $\leftarrow$ | 2    | 1      | 2      | $1^+$  | 2401.5502          | -0.0035                                |
| 3                    | 1     | 2     | $0^+$ | $\leftarrow$ | 2    | 1      | 1      | $1^+$  | 2554.8125          | 0.0079                                 |
| 4                    | 1     | 4     | $0^+$ | $\leftarrow$ | 3    | 1      | 3      | $1^+$  | 3204.6926          | 0.0013                                 |
| 4                    | 0     | 4     | $0^+$ | $\leftarrow$ | 3    | 0      | 3      | $1^+$  | 3284.2429          | 0.0084                                 |
| 4                    | 1     | 3     | $0^+$ | $\leftarrow$ | 3    | 1      | 2      | $1^+$  | 3409.7907          | 0.0014                                 |
| 5                    | 1     | 5     | $0^+$ | $\leftarrow$ | 4    | 1      | 4      | $1^+$  | 4005.5354          | 0.0026                                 |
| 5                    | 0     | 5     | $0^+$ | $\leftarrow$ | 4    | 0      | 4      | $1^+$  | 4089.5481          | 0.0070                                 |
| 5                    | 2     | 4     | $0^+$ | $\leftarrow$ | 4    | 2      | 3      | $1^+$  | 4139.3245          | 0.0119                                 |
| 5                    | 2     | 3     | $0^+$ | $\leftarrow$ | 4    | 2      | 2      | $1^+$  | 4195.6539          | -0.0100                                |
| 5                    | 1     | 4     | $0^+$ | $\leftarrow$ | 4    | 1      | 3      | $1^+$  | 4261.2365          | -0.0143                                |
| 6                    | 1     | 6     | $0^+$ | $\leftarrow$ | 5    | 1      | 5      | $1^+$  | 4803.6288          | -0.0099                                |
| 6                    | 0     | 6     | $0^+$ | $\leftarrow$ | 5    | 0      | 5      | $1^+$  | 4884.1406          | -0.0035                                |
| 6                    | 2     | 5     | $0^+$ | $\leftarrow$ | 5    | 2      | 4      | $1^+$  | 4966.3393          | 0.0272                                 |
| 6                    | 4     | 3     | $0^+$ | $\leftarrow$ | 5    | 4      | 2      | $1^+$  | 4984.8217          | 0.0050                                 |
| 6                    | 4     | 2     | $0^+$ | $\leftarrow$ | 5    | 4      | 1      | $1^+$  | 4984.9397          | 0.0079                                 |
| 6                    | 3     | 4     | $0^+$ | $\leftarrow$ | 5    | 3      | 3      | $1^+$  | 4990.9996          | 0.0121                                 |
| 6                    | 3     | 3     | $0^+$ | $\leftarrow$ | 5    | 3      | 2      | $1^+$  | 4996.8645          | 0.0229                                 |
| 6                    | 2     | 4     | $0^+$ | $\leftarrow$ | 5    | 2      | 3      | $1^+$  | 5059.9681          | -0.0231                                |
| 6                    | 1     | 5     | $0^+$ | $\leftarrow$ | 5    | 1      | 4      | $1^+$  | 5107.2389          | -0.0266                                |
| 7                    | 1     | 7     | $0^+$ | $\leftarrow$ | 6    | 1      | 6      | $1^+$  | 5598.7863          | -0.0184                                |
| 7                    | 0     | 7     | $0^+$ | $\leftarrow$ | 6    | 0      | 6      | $1^+$  | 5669.5930          | 0.0003                                 |
| 7                    | 2     | 6     | $0^+$ | $\leftarrow$ | 6    | 2      | 5      | $1^+$  | 5789.8671          | -0.0187                                |
| 7                    | 5     | 3     | $0^+$ | $\leftarrow$ | 6    | 5      | 2      | $1^+$  | 5816.3506          | 0.0160                                 |
| 7                    | 5     | 2     | $0^+$ | $\leftarrow$ | 6    | 5      | 1      | $1^+$  | 5816.3506          | 0.0160                                 |
| 7                    | 3     | 5     | $0^+$ | $\leftarrow$ | 6    | 3      | 4      | $1^+$  | 5829.1789          | 0.0000                                 |
| 7                    | 3     | 4     | $0^+$ | $\leftarrow$ | 6    | 3      | 3      | $1^+$  | 5842.1028          | 0.0058                                 |
| 7                    | 2     | 5     | $0^+$ | $\leftarrow$ | 6    | 2      | 4      | $1^+$  | 5928.8243          | -0.0256                                |
| 7                    | 1     | 6     | $0^+$ | $\leftarrow$ | 6    | 1      | 5      | $1^+$  | 5945.8111          | -0.0166                                |
| 8                    | 1     | 8     | $0^+$ | $\leftarrow$ | 7    | 1      | 7      | $1^+$  | 6391.0362          | -0.0202                                |
| 8                    | 0     | 8     | $0^+$ | $\leftarrow$ | 7    | 0      | 7      | $1^+$  | 6448.8116          | -0.0068                                |
| 8                    | 4     | 5     | $0^+$ | $\leftarrow$ | 7    | 4      | 4      | $1^+$  | 6662.0243          | 0.0107                                 |
| 8                    | 4     | 4     | $0^+$ | $\leftarrow$ | 7    | 4      | 3      | $1^+$  | 6663.0661          | 0.0133                                 |
| 8                    | 3     | 5     | $0^+$ | $\leftarrow$ | 7    | 3      | 4      | $1^+$  | 6691.5133          | 0.0206                                 |
| 8                    | 1     | 7     | $0^+$ | $\leftarrow$ | 7    | 1      | 6      | $1^+$  | 6775.0888          | 0.0115                                 |
| 8                    | 2     | 6     | $0^+$ | $\leftarrow$ | 7    | 2      | 5      | $1^+$  | 6798.2548          | 0.0062                                 |
| 9                    | 1     | 9     | $0^+$ | $\leftarrow$ | 8    | 1      | 8      | $1^+$  | 7180.6072          | -0.0027                                |
| 9                    | 0     | 9     | $0^+$ | $\leftarrow$ | 8    | 0      | 8      | $1^+$  | 7224.9317          | 0.0171                                 |
| 9                    | 3     | 6     | $0^+$ | $\leftarrow$ | 8    | 3      | 5      | $1^+$  | 7546.0243          | -0.0093                                |
| 3                    | 1     | 2     | $0^+$ | $\leftarrow$ | 2    | 1      | 1      | $1^+$  | 2554.8131          | 0.0085                                 |
| 5                    | 3     | 3     | $0^+$ | $\leftarrow$ | 4    | 3      | 2      | $1^+$  | 4152.6264          | -0.0008                                |
| 5                    | 3     | 2     | $0^+$ | $\leftarrow$ | 4    | 3      | 1      | $1^+$  | 4154.8483          | -0.0003                                |
| 8                    | 6     | 3     | $0^+$ | $\leftarrow$ | 7    | 6      | 2      | $1^+$  | 6647.7839          | -0.0078                                |
| 8                    | 6     | 2     | $0^+$ | $\leftarrow$ | 7    | 6      | 1      | $1^+$  | 6647.7839          | -0.0078                                |
| $1^+ \leftarrow 0^+$ |       |       |       |              |      |        |        |        |                    |                                        |
| 3                    | 1     | 3     | $1^+$ | $\leftarrow$ | 2    | 1      | 2      | $0^+$  | 2425.4369          | 0.0309                                 |
| 3                    | 0     | 3     | $1^+$ | $\leftarrow$ | 2    | 0      | 2      | $0^+$  | 2487.3128          | 0.0023                                 |
| 4                    | 1     | 4     | $1^+$ | $\leftarrow$ | 3    | 1      | 3      | $0^+$  | 3224.9955          | 0.0109                                 |

| $J$                  | $K_a$ | $K_c$ | $v$            | $\leftarrow$ | $J'$ | $K_a'$ | $K_c'$ | $v'$           | $V_{obs}$ | $V_{obs}-V_{calc}$ |
|----------------------|-------|-------|----------------|--------------|------|--------|--------|----------------|-----------|--------------------|
| 4                    | 0     | 4     | 1 <sup>+</sup> | $\leftarrow$ | 3    | 0      | 3      | 0 <sup>+</sup> | 3297.7667 | 0.0117             |
| 4                    | 1     | 3     | 1 <sup>+</sup> | $\leftarrow$ | 3    | 1      | 2      | 0 <sup>+</sup> | 3414.5864 | -0.0141            |
| 5                    | 1     | 5     | 1 <sup>+</sup> | $\leftarrow$ | 4    | 1      | 4      | 0 <sup>+</sup> | 4022.0811 | 0.0037             |
| 5                    | 0     | 5     | 1 <sup>+</sup> | $\leftarrow$ | 4    | 0      | 4      | 0 <sup>+</sup> | 4098.6760 | 0.0207             |
| 5                    | 2     | 4     | 1 <sup>+</sup> | $\leftarrow$ | 4    | 2      | 3      | 0 <sup>+</sup> | 4145.9712 | -0.0591            |
| 5                    | 2     | 3     | 1 <sup>+</sup> | $\leftarrow$ | 4    | 2      | 2      | 0 <sup>+</sup> | 4199.7235 | 0.0061             |
| 5                    | 1     | 4     | 1 <sup>+</sup> | $\leftarrow$ | 4    | 1      | 3      | 0 <sup>+</sup> | 4256.8936 | -0.0012            |
| 6                    | 1     | 6     | 1 <sup>+</sup> | $\leftarrow$ | 5    | 1      | 5      | 0 <sup>+</sup> | 4816.6048 | -0.0090            |
| 6                    | 0     | 6     | 1 <sup>+</sup> | $\leftarrow$ | 5    | 0      | 5      | 0 <sup>+</sup> | 4890.1362 | 0.0171             |
| 6                    | 2     | 5     | 1 <sup>+</sup> | $\leftarrow$ | 5    | 2      | 4      | 0 <sup>+</sup> | 4965.5115 | -0.0213            |
| 6                    | 3     | 4     | 1 <sup>+</sup> | $\leftarrow$ | 5    | 3      | 3      | 0 <sup>+</sup> | 4992.8514 | -0.0108            |
| 6                    | 4     | 3     | 1 <sup>+</sup> | $\leftarrow$ | 5    | 4      | 2      | 0 <sup>+</sup> | 4992.2804 | 0.0140             |
| 6                    | 4     | 2     | 1 <sup>+</sup> | $\leftarrow$ | 5    | 4      | 1      | 0 <sup>+</sup> | 4992.4005 | 0.0191             |
| 6                    | 3     | 3     | 1 <sup>+</sup> | $\leftarrow$ | 5    | 3      | 2      | 0 <sup>+</sup> | 4998.6421 | -0.0225            |
| 6                    | 2     | 4     | 1 <sup>+</sup> | $\leftarrow$ | 5    | 2      | 3      | 0 <sup>+</sup> | 5055.2630 | -0.0021            |
| 6                    | 1     | 5     | 1 <sup>+</sup> | $\leftarrow$ | 5    | 1      | 4      | 0 <sup>+</sup> | 5095.2534 | 0.0137             |
| 7                    | 1     | 7     | 1 <sup>+</sup> | $\leftarrow$ | 6    | 1      | 6      | 0 <sup>+</sup> | 5608.6359 | -0.0137            |
| 7                    | 0     | 7     | 1 <sup>+</sup> | $\leftarrow$ | 6    | 0      | 6      | 0 <sup>+</sup> | 5673.7250 | 0.0045             |
| 7                    | 2     | 6     | 1 <sup>+</sup> | $\leftarrow$ | 6    | 2      | 5      | 0 <sup>+</sup> | 5782.7537 | -0.0153            |
| 7                    | 2     | 5     | 1 <sup>+</sup> | $\leftarrow$ | 6    | 2      | 4      | 0 <sup>+</sup> | 5917.2469 | -0.0040            |
| 8                    | 1     | 8     | 1 <sup>+</sup> | $\leftarrow$ | 7    | 1      | 7      | 0 <sup>+</sup> | 6398.3300 | -0.0123            |
| 8                    | 0     | 8     | 1 <sup>+</sup> | $\leftarrow$ | 7    | 0      | 7      | 0 <sup>+</sup> | 6452.0154 | -0.0128            |
| 8                    | 2     | 7     | 1 <sup>+</sup> | $\leftarrow$ | 7    | 2      | 6      | 0 <sup>+</sup> | 6597.5752 | -0.0030            |
| 8                    | 3     | 6     | 1 <sup>+</sup> | $\leftarrow$ | 7    | 3      | 5      | 0 <sup>+</sup> | 6655.7352 | 0.0158             |
| 8                    | 4     | 4     | 1 <sup>+</sup> | $\leftarrow$ | 7    | 4      | 3      | 0 <sup>+</sup> | 6655.2916 | -0.0138            |
| 8                    | 3     | 5     | 1 <sup>+</sup> | $\leftarrow$ | 7    | 3      | 4      | 0 <sup>+</sup> | 6681.1006 | -0.0164            |
| 8                    | 1     | 7     | 1 <sup>+</sup> | $\leftarrow$ | 7    | 1      | 6      | 0 <sup>+</sup> | 6755.5783 | 0.0015             |
| 8                    | 2     | 6     | 1 <sup>+</sup> | $\leftarrow$ | 7    | 2      | 5      | 0 <sup>+</sup> | 6782.8948 | -0.0126            |
| 9                    | 1     | 9     | 1 <sup>+</sup> | $\leftarrow$ | 8    | 1      | 8      | 0 <sup>+</sup> | 7185.9326 | 0.0112             |
| 9                    | 0     | 9     | 1 <sup>+</sup> | $\leftarrow$ | 8    | 0      | 8      | 0 <sup>+</sup> | 7227.6738 | -0.0019            |
| 9                    | 2     | 8     | 1 <sup>+</sup> | $\leftarrow$ | 8    | 2      | 7      | 0 <sup>+</sup> | 7409.7345 | 0.0226             |
| 9                    | 2     | 7     | 1 <sup>+</sup> | $\leftarrow$ | 8    | 2      | 6      | 0 <sup>+</sup> | 7648.8844 | 0.0016             |
| 5                    | 3     | 3     | 1 <sup>+</sup> | $\leftarrow$ | 4    | 3      | 2      | 0 <sup>+</sup> | 4163.2108 | 0.0138             |
| 5                    | 3     | 2     | 1 <sup>+</sup> | $\leftarrow$ | 4    | 3      | 1      | 0 <sup>+</sup> | 4165.4010 | 0.0163             |
| 7                    | 3     | 5     | 1 <sup>+</sup> | $\leftarrow$ | 6    | 3      | 4      | 0 <sup>+</sup> | 5823.7262 | -0.0091            |
| 8                    | 6     | 3     | 1 <sup>+</sup> | $\leftarrow$ | 7    | 6      | 2      | 0 <sup>+</sup> | 6649.9981 | 0.0135             |
| 8                    | 6     | 2     | 1 <sup>+</sup> | $\leftarrow$ | 7    | 6      | 1      | 0 <sup>+</sup> | 6649.9981 | 0.0135             |
| $0^- \leftarrow 1^-$ |       |       |                |              |      |        |        |                |           |                    |
| 3                    | 1     | 3     | 0 <sup>-</sup> | $\leftarrow$ | 2    | 1      | 2      | 1 <sup>-</sup> | 2403.1977 | -0.0056            |
| 3                    | 0     | 3     | 0 <sup>-</sup> | $\leftarrow$ | 2    | 0      | 2      | 1 <sup>-</sup> | 2470.0496 | -0.0012            |
| 3                    | 1     | 2     | 0 <sup>-</sup> | $\leftarrow$ | 2    | 1      | 1      | 1 <sup>-</sup> | 2556.0491 | 0.0121             |
| 4                    | 1     | 4     | 0 <sup>-</sup> | $\leftarrow$ | 3    | 1      | 3      | 1 <sup>-</sup> | 3206.0386 | 0.0003             |
| 4                    | 0     | 4     | 0 <sup>-</sup> | $\leftarrow$ | 3    | 0      | 3      | 1 <sup>-</sup> | 3285.1849 | 0.0096             |
| 4                    | 1     | 3     | 0 <sup>-</sup> | $\leftarrow$ | 3    | 1      | 2      | 1 <sup>-</sup> | 3410.4020 | 0.0061             |
| 5                    | 1     | 5     | 0 <sup>-</sup> | $\leftarrow$ | 4    | 1      | 4      | 1 <sup>-</sup> | 4006.5580 | 0.0043             |
| 5                    | 0     | 5     | 0 <sup>-</sup> | $\leftarrow$ | 4    | 0      | 4      | 1 <sup>-</sup> | 4090.0801 | 0.0070             |
| 5                    | 2     | 4     | 0 <sup>-</sup> | $\leftarrow$ | 4    | 2      | 3      | 1 <sup>-</sup> | 4139.9013 | 0.0176             |
| 5                    | 2     | 3     | 0 <sup>-</sup> | $\leftarrow$ | 4    | 2      | 2      | 1 <sup>-</sup> | 4196.3037 | -0.0109            |
| 5                    | 1     | 4     | 0 <sup>-</sup> | $\leftarrow$ | 4    | 1      | 3      | 1 <sup>-</sup> | 4261.2365 | -0.0143            |
| 6                    | 1     | 6     | 0 <sup>-</sup> | $\leftarrow$ | 5    | 1      | 5      | 1 <sup>-</sup> | 4804.3339 | -0.0048            |
| 6                    | 0     | 6     | 0 <sup>-</sup> | $\leftarrow$ | 5    | 0      | 5      | 1 <sup>-</sup> | 4884.3330 | -0.0008            |
| 6                    | 2     | 5     | 0 <sup>-</sup> | $\leftarrow$ | 5    | 2      | 4      | 1 <sup>-</sup> | 4966.3393 | 0.0272             |
| 6                    | 4     | 3     | 0 <sup>-</sup> | $\leftarrow$ | 5    | 4      | 2      | 1 <sup>-</sup> | 4985.5817 | 0.0077             |
| 6                    | 4     | 2     | 0 <sup>-</sup> | $\leftarrow$ | 5    | 4      | 1      | 1 <sup>-</sup> | 4985.6951 | 0.0048             |
| 6                    | 3     | 4     | 0 <sup>-</sup> | $\leftarrow$ | 5    | 3      | 3      | 1 <sup>-</sup> | 4991.3537 | 0.0114             |
| 6                    | 2     | 4     | 0 <sup>-</sup> | $\leftarrow$ | 5    | 2      | 3      | 1 <sup>-</sup> | 5060.1439 | -0.0258            |
| 6                    | 1     | 5     | 0 <sup>-</sup> | $\leftarrow$ | 5    | 1      | 4      | 1 <sup>-</sup> | 5106.7084 | -0.0210            |
| 7                    | 1     | 7     | 0 <sup>-</sup> | $\leftarrow$ | 6    | 1      | 6      | 1 <sup>-</sup> | 5599.1975 | -0.0120            |
| 7                    | 0     | 7     | 0 <sup>-</sup> | $\leftarrow$ | 6    | 0      | 6      | 1 <sup>-</sup> | 5669.5241 | -0.0018            |



| $J$ | $K_a$ | $K_c$ | $v$            | $\leftarrow$ | $J'$               | $K_a'$ | $K_c'$ | $v'$           | $V_{obs}$ | $V_{obs}-V_{calc}$ |
|-----|-------|-------|----------------|--------------|--------------------|--------|--------|----------------|-----------|--------------------|
| 7   | 2     | 6     | 0 <sup>-</sup> | $\leftarrow$ | 6                  | 2      | 5      | 1 <sup>-</sup> | 5789.4340 | -0.0040            |
| 7   | 5     | 3     | 0 <sup>-</sup> | $\leftarrow$ | 6                  | 5      | 2      | 1 <sup>-</sup> | 5816.9454 | 0.0149             |
| 7   | 5     | 2     | 0 <sup>-</sup> | $\leftarrow$ | 6                  | 5      | 1      | 1 <sup>-</sup> | 5816.9454 | 0.0149             |
| 7   | 3     | 5     | 0 <sup>-</sup> | $\leftarrow$ | 6                  | 3      | 4      | 1 <sup>-</sup> | 5829.0617 | 0.0008             |
| 7   | 3     | 4     | 0 <sup>-</sup> | $\leftarrow$ | 6                  | 3      | 3      | 1 <sup>-</sup> | 5842.1028 | 0.0058             |
| 7   | 1     | 6     | 0 <sup>-</sup> | $\leftarrow$ | 6                  | 1      | 5      | 1 <sup>-</sup> | 5944.9122 | -0.0154            |
| 8   | 1     | 8     | 0 <sup>-</sup> | $\leftarrow$ | 7                  | 1      | 7      | 1 <sup>-</sup> | 6391.1900 | -0.0147            |
| 8   | 0     | 8     | 0 <sup>-</sup> | $\leftarrow$ | 7                  | 0      | 7      | 1 <sup>-</sup> | 6448.5718 | -0.0020            |
| 8   | 2     | 7     | 0 <sup>-</sup> | $\leftarrow$ | 7                  | 2      | 6      | 1 <sup>-</sup> | 6608.6031 | -0.0174            |
| 8   | 6     | 3     | 0 <sup>-</sup> | $\leftarrow$ | 7                  | 6      | 2      | 1 <sup>-</sup> | 6648.2486 | 0.0015             |
| 8   | 6     | 2     | 0 <sup>-</sup> | $\leftarrow$ | 7                  | 6      | 1      | 1 <sup>-</sup> | 6648.2486 | 0.0015             |
| 8   | 4     | 5     | 0 <sup>-</sup> | $\leftarrow$ | 7                  | 4      | 4      | 1 <sup>-</sup> | 6661.8104 | 0.0083             |
| 8   | 4     | 4     | 0 <sup>-</sup> | $\leftarrow$ | 7                  | 4      | 3      | 1 <sup>-</sup> | 6662.8595 | 0.0062             |
| 8   | 3     | 5     | 0 <sup>-</sup> | $\leftarrow$ | 7                  | 3      | 4      | 1 <sup>-</sup> | 6691.3004 | 0.0164             |
| 8   | 1     | 7     | 0 <sup>-</sup> | $\leftarrow$ | 7                  | 1      | 6      | 1 <sup>-</sup> | 6773.9943 | 0.0149             |
| 8   | 2     | 6     | 0 <sup>-</sup> | $\leftarrow$ | 7                  | 2      | 5      | 1 <sup>-</sup> | 6797.9964 | 0.0002             |
| 9   | 1     | 9     | 0 <sup>-</sup> | $\leftarrow$ | 8                  | 1      | 8      | 1 <sup>-</sup> | 7180.5448 | -0.0009            |
| 9   | 0     | 9     | 0 <sup>-</sup> | $\leftarrow$ | 8                  | 0      | 8      | 1 <sup>-</sup> | 7224.5644 | 0.0158             |
| 9   | 3     | 6     | 0 <sup>-</sup> | $\leftarrow$ | 8                  | 3      | 5      | 1 <sup>-</sup> | 7545.8777 | -0.0012            |
| 4   | 2     | 3     | 0 <sup>-</sup> | $\leftarrow$ | 3                  | 2      | 2      | 1 <sup>-</sup> | 3310.8743 | 0.0043             |
| 5   | 3     | 3     | 0 <sup>-</sup> | $\leftarrow$ | 4                  | 3      | 2      | 1 <sup>-</sup> | 4153.5629 | -0.0039            |
| 5   | 3     | 2     | 0 <sup>-</sup> | $\leftarrow$ | 4                  | 3      | 1      | 1 <sup>-</sup> | 4155.8139 | 0.0100             |
|     |       |       |                |              | $1 \leftarrow 0^-$ |        |        |                |           |                    |
| 3   | 1     | 3     | 1 <sup>-</sup> | $\leftarrow$ | 2                  | 1      | 2      | 0 <sup>-</sup> | 2423.6695 | 0.0229             |
| 3   | 0     | 3     | 1 <sup>-</sup> | $\leftarrow$ | 2                  | 0      | 2      | 0 <sup>-</sup> | 2486.0584 | -0.0013            |
| 3   | 1     | 2     | 1 <sup>-</sup> | $\leftarrow$ | 2                  | 1      | 1      | 0 <sup>-</sup> | 2568.2318 | -0.0049            |
| 4   | 1     | 4     | 1 <sup>-</sup> | $\leftarrow$ | 3                  | 1      | 3      | 0 <sup>-</sup> | 3223.4691 | 0.0126             |
| 4   | 0     | 4     | 1 <sup>-</sup> | $\leftarrow$ | 3                  | 0      | 3      | 0 <sup>-</sup> | 3296.8408 | -0.0013            |
| 4   | 1     | 3     | 1 <sup>-</sup> | $\leftarrow$ | 3                  | 1      | 2      | 0 <sup>-</sup> | 3414.6495 | -0.0101            |
| 5   | 1     | 5     | 1 <sup>-</sup> | $\leftarrow$ | 4                  | 1      | 4      | 0 <sup>-</sup> | 4020.7829 | 0.0023             |
| 5   | 0     | 5     | 1 <sup>-</sup> | $\leftarrow$ | 4                  | 0      | 4      | 0 <sup>-</sup> | 4097.9924 | 0.0102             |
| 5   | 2     | 4     | 1 <sup>-</sup> | $\leftarrow$ | 4                  | 2      | 3      | 0 <sup>-</sup> | 4145.7452 | -0.0190            |
| 5   | 2     | 3     | 1 <sup>-</sup> | $\leftarrow$ | 4                  | 2      | 2      | 0 <sup>-</sup> | 4199.8914 | 0.0051             |
| 5   | 1     | 4     | 1 <sup>-</sup> | $\leftarrow$ | 4                  | 1      | 3      | 0 <sup>-</sup> | 4257.6714 | -0.0032            |
| 6   | 1     | 6     | 1 <sup>-</sup> | $\leftarrow$ | 5                  | 1      | 5      | 0 <sup>-</sup> | 4815.5140 | -0.0066            |
| 6   | 0     | 6     | 1 <sup>-</sup> | $\leftarrow$ | 5                  | 0      | 5      | 0 <sup>-</sup> | 4889.5691 | 0.0135             |
| 6   | 2     | 5     | 1 <sup>-</sup> | $\leftarrow$ | 5                  | 2      | 4      | 0 <sup>-</sup> | 4965.7970 | -0.0201            |
| 6   | 3     | 4     | 1 <sup>-</sup> | $\leftarrow$ | 5                  | 3      | 3      | 0 <sup>-</sup> | 4993.0566 | -0.0069            |
| 6   | 4     | 3     | 1 <sup>-</sup> | $\leftarrow$ | 5                  | 4      | 2      | 0 <sup>-</sup> | 4992.0640 | 0.0100             |
| 6   | 4     | 2     | 1 <sup>-</sup> | $\leftarrow$ | 5                  | 4      | 1      | 0 <sup>-</sup> | 4992.1824 | 0.0122             |
| 6   | 3     | 3     | 1 <sup>-</sup> | $\leftarrow$ | 5                  | 3      | 2      | 0 <sup>-</sup> | 4998.8931 | -0.0189            |
| 6   | 2     | 4     | 1 <sup>-</sup> | $\leftarrow$ | 5                  | 2      | 3      | 0 <sup>-</sup> | 5056.2175 | 0.0062             |
| 6   | 1     | 5     | 1 <sup>-</sup> | $\leftarrow$ | 5                  | 1      | 4      | 0 <sup>-</sup> | 5096.6026 | 0.0135             |
| 7   | 1     | 7     | 1 <sup>-</sup> | $\leftarrow$ | 6                  | 1      | 6      | 0 <sup>-</sup> | 5607.7050 | -0.0110            |
| 7   | 0     | 7     | 1 <sup>-</sup> | $\leftarrow$ | 6                  | 0      | 6      | 0 <sup>-</sup> | 5673.1624 | 0.0050             |
| 7   | 2     | 6     | 1 <sup>-</sup> | $\leftarrow$ | 6                  | 2      | 5      | 0 <sup>-</sup> | 5783.4838 | -0.0147            |
| 7   | 3     | 4     | 1 <sup>-</sup> | $\leftarrow$ | 6                  | 3      | 3      | 0 <sup>-</sup> | 5837.5045 | -0.0205            |
| 7   | 2     | 5     | 1 <sup>-</sup> | $\leftarrow$ | 6                  | 2      | 4      | 0 <sup>-</sup> | 5918.8208 | 0.0054             |
| 7   | 1     | 6     | 1 <sup>-</sup> | $\leftarrow$ | 6                  | 1      | 5      | 0 <sup>-</sup> | 5930.3386 | 0.0182             |
| 8   | 1     | 8     | 1 <sup>-</sup> | $\leftarrow$ | 7                  | 1      | 7      | 0 <sup>-</sup> | 6397.5103 | -0.0090            |
| 8   | 0     | 8     | 1 <sup>-</sup> | $\leftarrow$ | 7                  | 0      | 7      | 0 <sup>-</sup> | 6451.3976 | -0.0097            |
| 8   | 2     | 7     | 1 <sup>-</sup> | $\leftarrow$ | 7                  | 2      | 6      | 0 <sup>-</sup> | 6598.6079 | -0.0084            |
| 8   | 4     | 4     | 1 <sup>-</sup> | $\leftarrow$ | 7                  | 4      | 3      | 0 <sup>-</sup> | 6656.2954 | -0.0077            |
| 8   | 3     | 6     | 1 <sup>-</sup> | $\leftarrow$ | 7                  | 3      | 5      | 0 <sup>-</sup> | 6656.9103 | 0.0180             |
| 8   | 4     | 5     | 1 <sup>-</sup> | $\leftarrow$ | 7                  | 4      | 4      | 0 <sup>-</sup> | 6655.2438 | -0.0027            |
| 8   | 3     | 5     | 1 <sup>-</sup> | $\leftarrow$ | 7                  | 3      | 4      | 0 <sup>-</sup> | 6682.4383 | -0.0122            |
| 8   | 1     | 7     | 1 <sup>-</sup> | $\leftarrow$ | 7                  | 1      | 6      | 0 <sup>-</sup> | 6757.3558 | 0.0023             |
| 8   | 2     | 6     | 1 <sup>-</sup> | $\leftarrow$ | 7                  | 2      | 5      | 0 <sup>-</sup> | 6784.8262 | -0.0027            |
| 9   | 1     | 9     | 1 <sup>-</sup> | $\leftarrow$ | 8                  | 1      | 8      | 0 <sup>-</sup> | 7185.1695 | 0.0036             |

| $J$                                                        | $K_a$ | $K_c$ | $v$            | $\leftarrow$ | $J'$ | $K_a'$ | $K_c'$ | $v'$           | $V_{\text{obs}}$ | $V_{\text{obs}}-V_{\text{calc}}$ |
|------------------------------------------------------------|-------|-------|----------------|--------------|------|--------|--------|----------------|------------------|----------------------------------|
| 9                                                          | 0     | 9     | 1 <sup>-</sup> | $\leftarrow$ | 8    | 0      | 8      | 0 <sup>-</sup> | 7226.9821        | -0.0060                          |
| 9                                                          | 2     | 8     | 1 <sup>-</sup> | $\leftarrow$ | 8    | 2      | 7      | 0 <sup>-</sup> | 7410.9261        | 0.0104                           |
| 9                                                          | 6     | 4     | 1 <sup>-</sup> | $\leftarrow$ | 8    | 6      | 3      | 0 <sup>-</sup> | 7479.8987        | 0.0123                           |
| 9                                                          | 6     | 3     | 1 <sup>-</sup> | $\leftarrow$ | 8    | 6      | 2      | 0 <sup>-</sup> | 7479.8987        | 0.0123                           |
| 9                                                          | 3     | 6     | 1 <sup>-</sup> | $\leftarrow$ | 8    | 3      | 5      | 0 <sup>-</sup> | 7535.2605        | 0.0207                           |
| 9                                                          | 2     | 7     | 1 <sup>-</sup> | $\leftarrow$ | 8    | 2      | 6      | 0 <sup>-</sup> | 7650.8594        | -0.0062                          |
| 4                                                          | 2     | 3     | 1 <sup>-</sup> | $\leftarrow$ | 3    | 2      | 2      | 0 <sup>-</sup> | 3323.4824        | 0.0096                           |
| 4                                                          | 2     | 2     | 1 <sup>-</sup> | $\leftarrow$ | 3    | 2      | 1      | 0 <sup>-</sup> | 3351.3614        | 0.0149                           |
| 5                                                          | 3     | 3     | 1 <sup>-</sup> | $\leftarrow$ | 4    | 3      | 2      | 0 <sup>-</sup> | 4162.7252        | 0.0122                           |
| 5                                                          | 3     | 2     | 1 <sup>-</sup> | $\leftarrow$ | 4    | 3      | 1      | 0 <sup>-</sup> | 4164.9262        | 0.0068                           |
| 7                                                          | 3     | 5     | 1 <sup>-</sup> | $\leftarrow$ | 6    | 3      | 4      | 0 <sup>-</sup> | 5824.5003        | -0.0060                          |
| <b><sup>c</sup>R-branch</b>                                |       |       |                |              |      |        |        |                |                  |                                  |
| <b>0<sup>+</sup> <math>\leftarrow</math> 0<sup>+</sup></b> |       |       |                |              |      |        |        |                |                  |                                  |
| 6                                                          | 1     | 6     | 0 <sup>+</sup> | $\leftarrow$ | 5    | 2      | 4      | 0 <sup>+</sup> | 2521.0109        | -0.0119                          |
| 7                                                          | 1     | 7     | 0 <sup>+</sup> | $\leftarrow$ | 6    | 2      | 5      | 0 <sup>+</sup> | 3157.7837        | 0.0031                           |
| 2                                                          | 2     | 0     | 0 <sup>+</sup> | $\leftarrow$ | 1    | 1      | 0      | 0 <sup>+</sup> | 3543.5248        | -0.0154                          |
| 2                                                          | 2     | 1     | 0 <sup>+</sup> | $\leftarrow$ | 1    | 1      | 1      | 0 <sup>+</sup> | 3590.7118        | -0.0061                          |
| 6                                                          | 0     | 6     | 0 <sup>+</sup> | $\leftarrow$ | 5    | 1      | 4      | 0 <sup>+</sup> | 3801.3381        | -0.0007                          |
| 3                                                          | 2     | 1     | 0 <sup>+</sup> | $\leftarrow$ | 2    | 1      | 1      | 0 <sup>+</sup> | 4335.4836        | -0.0092                          |
| 7                                                          | 1     | 6     | 0 <sup>+</sup> | $\leftarrow$ | 6    | 2      | 4      | 0 <sup>+</sup> | 4338.2339        | -0.0026                          |
| 7                                                          | 0     | 7     | 0 <sup>+</sup> | $\leftarrow$ | 6    | 1      | 5      | 0 <sup>+</sup> | 4370.4117        | 0.0034                           |
| 3                                                          | 2     | 2     | 0 <sup>+</sup> | $\leftarrow$ | 2    | 1      | 2      | 0 <sup>+</sup> | 4471.1470        | 0.0093                           |
| 8                                                          | 0     | 8     | 0 <sup>+</sup> | $\leftarrow$ | 7    | 1      | 6      | 0 <sup>+</sup> | 4882.8106        | 0.0002                           |
| 4                                                          | 2     | 2     | 0 <sup>+</sup> | $\leftarrow$ | 3    | 1      | 2      | 0 <sup>+</sup> | 5118.9749        | -0.0059                          |
| 5                                                          | 1     | 4     | 0 <sup>+</sup> | $\leftarrow$ | 4    | 0      | 4      | 0 <sup>+</sup> | 5181.4579        | 0.0016                           |
| 4                                                          | 2     | 3     | 0 <sup>+</sup> | $\leftarrow$ | 3    | 1      | 3      | 0 <sup>+</sup> | 5375.8254        | 0.0009                           |
| 3                                                          | 3     | 0     | 0 <sup>+</sup> | $\leftarrow$ | 2    | 2      | 0      | 0 <sup>+</sup> | 5664.8410        | -0.0228                          |
| 3                                                          | 3     | 1     | 0 <sup>+</sup> | $\leftarrow$ | 2    | 2      | 1      | 0 <sup>+</sup> | 5667.6674        | -0.0249                          |
| 5                                                          | 2     | 3     | 0 <sup>+</sup> | $\leftarrow$ | 4    | 1      | 3      | 0 <sup>+</sup> | 5904.4030        | -0.0085                          |
| 9                                                          | 1     | 8     | 0 <sup>+</sup> | $\leftarrow$ | 8    | 2      | 6      | 0 <sup>+</sup> | 5971.8025        | 0.0104                           |
| 6                                                          | 1     | 5     | 0 <sup>+</sup> | $\leftarrow$ | 5    | 0      | 5      | 0 <sup>+</sup> | 6189.2965        | -0.0068                          |
| 5                                                          | 2     | 4     | 0 <sup>+</sup> | $\leftarrow$ | 4    | 1      | 4      | 0 <sup>+</sup> | 6304.6969        | 0.0035                           |
| 4                                                          | 3     | 1     | 0 <sup>+</sup> | $\leftarrow$ | 3    | 2      | 1      | 0 <sup>+</sup> | 6489.6212        | 0.0030                           |
| 4                                                          | 3     | 2     | 0 <sup>+</sup> | $\leftarrow$ | 3    | 2      | 2      | 0 <sup>+</sup> | 6503.4598        | 0.0022                           |
| 6                                                          | 2     | 4     | 0 <sup>+</sup> | $\leftarrow$ | 5    | 1      | 4      | 0 <sup>+</sup> | 6702.8039        | -0.0030                          |
| 7                                                          | 1     | 6     | 0 <sup>+</sup> | $\leftarrow$ | 6    | 0      | 6      | 0 <sup>+</sup> | 7239.7229        | -0.0057                          |
| 6                                                          | 2     | 5     | 0 <sup>+</sup> | $\leftarrow$ | 5    | 1      | 5      | 0 <sup>+</sup> | 7257.6211        | -0.0168                          |
| 5                                                          | 3     | 2     | 0 <sup>+</sup> | $\leftarrow$ | 4    | 2      | 2      | 0 <sup>+</sup> | 7304.4371        | 0.0234                           |
| 5                                                          | 3     | 3     | 0 <sup>+</sup> | $\leftarrow$ | 4    | 2      | 3      | 0 <sup>+</sup> | 7344.6654        | 0.0131                           |
| 7                                                          | 2     | 5     | 0 <sup>+</sup> | $\leftarrow$ | 6    | 1      | 5      | 0 <sup>+</sup> | 7524.3625        | -0.0036                          |
| <b>1<sup>+</sup> <math>\leftarrow</math> 1<sup>+</sup></b> |       |       |                |              |      |        |        |                |                  |                                  |
| 6                                                          | 1     | 6     | 1 <sup>+</sup> | $\leftarrow$ | 5    | 2      | 4      | 1 <sup>+</sup> | 2525.2759        | -0.0004                          |
| 7                                                          | 1     | 7     | 1 <sup>+</sup> | $\leftarrow$ | 6    | 2      | 5      | 1 <sup>+</sup> | 3164.1310        | -0.0087                          |
| 2                                                          | 2     | 0     | 1 <sup>+</sup> | $\leftarrow$ | 1    | 1      | 0      | 1 <sup>+</sup> | 3543.4227        | 0.0164                           |
| 2                                                          | 2     | 1     | 1 <sup>+</sup> | $\leftarrow$ | 1    | 1      | 1      | 1 <sup>+</sup> | 3589.4731        | 0.0182                           |
| 6                                                          | 0     | 6     | 1 <sup>+</sup> | $\leftarrow$ | 5    | 1      | 4      | 1 <sup>+</sup> | 3808.0771        | -0.0042                          |
| 7                                                          | 1     | 6     | 1 <sup>+</sup> | $\leftarrow$ | 6    | 2      | 4      | 1 <sup>+</sup> | 4333.1013        | -0.0113                          |
| 3                                                          | 2     | 1     | 1 <sup>+</sup> | $\leftarrow$ | 2    | 1      | 1      | 1 <sup>+</sup> | 4335.0641        | 0.0064                           |
| 9                                                          | 1     | 9     | 1 <sup>+</sup> | $\leftarrow$ | 8    | 2      | 7      | 1 <sup>+</sup> | 4353.6553        | 0.0018                           |
| 3                                                          | 2     | 2     | 1 <sup>+</sup> | $\leftarrow$ | 2    | 1      | 2      | 1 <sup>+</sup> | 4467.6573        | 0.0041                           |
| 4                                                          | 2     | 2     | 1 <sup>+</sup> | $\leftarrow$ | 3    | 1      | 2      | 1 <sup>+</sup> | 5118.5442        | 0.0072                           |
| 5                                                          | 1     | 4     | 1 <sup>+</sup> | $\leftarrow$ | 4    | 0      | 4      | 1 <sup>+</sup> | 5171.6015        | 0.0228                           |
| 4                                                          | 2     | 3     | 1 <sup>+</sup> | $\leftarrow$ | 3    | 1      | 3      | 1 <sup>+</sup> | 5370.0619        | -0.0101                          |
| 9                                                          | 0     | 9     | 1 <sup>+</sup> | $\leftarrow$ | 8    | 1      | 7      | 1 <sup>+</sup> | 5354.9104        | 0.0010                           |
| 3                                                          | 3     | 0     | 1 <sup>+</sup> | $\leftarrow$ | 2    | 2      | 0      | 1 <sup>+</sup> | 5664.2951        | 0.0243                           |
| 3                                                          | 3     | 1     | 1 <sup>+</sup> | $\leftarrow$ | 2    | 2      | 1      | 1 <sup>+</sup> | 5667.0297        | 0.0179                           |
| 5                                                          | 2     | 3     | 1 <sup>+</sup> | $\leftarrow$ | 4    | 1      | 3      | 1 <sup>+</sup> | 5904.0999        | 0.0022                           |
| 9                                                          | 1     | 8     | 1 <sup>+</sup> | $\leftarrow$ | 8    | 2      | 6      | 1 <sup>+</sup> | 5970.6917        | 0.0141                           |
| 6                                                          | 1     | 5     | 1 <sup>+</sup> | $\leftarrow$ | 5    | 0      | 5      | 1 <sup>+</sup> | 6178.0569        | 0.0118                           |

| $J$                  | $K_a$ | $K_c$ | $v$            | $\leftarrow$ | $J'$ | $K_a'$ | $K_c'$ | $v'$           | $V_{\text{obs}}$ | $V_{\text{obs}}-V_{\text{calc}}$ |
|----------------------|-------|-------|----------------|--------------|------|--------|--------|----------------|------------------|----------------------------------|
| 5                    | 2     | 4     | 1 <sup>+</sup> | $\leftarrow$ | 4    | 1      | 4      | 1 <sup>+</sup> | 6296.8536        | -0.0165                          |
| 4                    | 3     | 1     | 1 <sup>+</sup> | $\leftarrow$ | 3    | 2      | 1      | 1 <sup>+</sup> | 6488.2996        | 0.0067                           |
| 4                    | 3     | 2     | 1 <sup>+</sup> | $\leftarrow$ | 3    | 2      | 2      | 1 <sup>+</sup> | 6501.7648        | 0.0148                           |
| 6                    | 2     | 4     | 1 <sup>+</sup> | $\leftarrow$ | 5    | 1      | 4      | 1 <sup>+</sup> | 6702.8039        | -0.0030                          |
| 7                    | 1     | 6     | 1 <sup>+</sup> | $\leftarrow$ | 6    | 0      | 6      | 1 <sup>+</sup> | 7227.8095        | -0.0036                          |
| 6                    | 2     | 5     | 1 <sup>+</sup> | $\leftarrow$ | 5    | 1      | 5      | 1 <sup>+</sup> | 7248.1287        | -0.0200                          |
| 5                    | 3     | 2     | 1 <sup>+</sup> | $\leftarrow$ | 4    | 2      | 2      | 1 <sup>+</sup> | 7303.0196        | 0.0017                           |
| 5                    | 3     | 3     | 1 <sup>+</sup> | $\leftarrow$ | 4    | 2      | 3      | 1 <sup>+</sup> | 7342.3232        | 0.0092                           |
| $0^- \leftarrow 0^-$ |       |       |                |              |      |        |        |                |                  |                                  |
| 6                    | 1     | 6     | 0 <sup>-</sup> | $\leftarrow$ | 5    | 2      | 4      | 0 <sup>-</sup> | 2521.3906        | 0.0025                           |
| 7                    | 1     | 7     | 0 <sup>-</sup> | $\leftarrow$ | 6    | 2      | 5      | 0 <sup>-</sup> | 3157.8755        | -0.0061                          |
| 5                    | 0     | 5     | 0 <sup>-</sup> | $\leftarrow$ | 4    | 1      | 3      | 0 <sup>-</sup> | 3174.7063        | -0.0164                          |
| 6                    | 1     | 5     | 0 <sup>-</sup> | $\leftarrow$ | 5    | 2      | 3      | 0 <sup>-</sup> | 3460.9637        | -0.0098                          |
| 2                    | 2     | 0     | 0 <sup>-</sup> | $\leftarrow$ | 1    | 1      | 0      | 0 <sup>-</sup> | 3542.4644        | -0.0177                          |
| 2                    | 2     | 1     | 0 <sup>-</sup> | $\leftarrow$ | 1    | 1      | 1      | 0 <sup>-</sup> | 3589.6584        | -0.0059                          |
| 6                    | 0     | 6     | 0 <sup>-</sup> | $\leftarrow$ | 5    | 1      | 4      | 0 <sup>-</sup> | 3800.8660        | 0.0019                           |
| 3                    | 2     | 1     | 0 <sup>-</sup> | $\leftarrow$ | 2    | 1      | 1      | 0 <sup>-</sup> | 4334.3911        | -0.0109                          |
| 7                    | 1     | 6     | 0 <sup>-</sup> | $\leftarrow$ | 6    | 2      | 4      | 0 <sup>-</sup> | 4339.4629        | 0.0043                           |
| 7                    | 0     | 7     | 0 <sup>-</sup> | $\leftarrow$ | 6    | 1      | 5      | 0 <sup>-</sup> | 4369.4042        | 0.0040                           |
| 3                    | 2     | 2     | 0 <sup>-</sup> | $\leftarrow$ | 2    | 1      | 2      | 0 <sup>-</sup> | 4470.0648        | 0.0050                           |
| 9                    | 2     | 7     | 0 <sup>-</sup> | $\leftarrow$ | 8    | 3      | 5      | 0 <sup>-</sup> | 4802.8254        | 0.0063                           |
| 10                   | 2     | 9     | 0 <sup>-</sup> | $\leftarrow$ | 9    | 3      | 7      | 0 <sup>-</sup> | 4825.7536        | 0.0077                           |
| 8                    | 0     | 8     | 0 <sup>-</sup> | $\leftarrow$ | 7    | 1      | 6      | 0 <sup>-</sup> | 4881.0798        | 0.0012                           |
| 4                    | 2     | 2     | 0 <sup>-</sup> | $\leftarrow$ | 3    | 1      | 2      | 0 <sup>-</sup> | 5117.8956        | -0.0097                          |
| 5                    | 1     | 4     | 0 <sup>-</sup> | $\leftarrow$ | 4    | 0      | 4      | 0 <sup>-</sup> | 5181.4579        | 0.0016                           |
| 9                    | 0     | 9     | 0 <sup>-</sup> | $\leftarrow$ | 8    | 1      | 7      | 0 <sup>-</sup> | 5341.0471        | -0.0092                          |
| 4                    | 2     | 3     | 0 <sup>-</sup> | $\leftarrow$ | 3    | 1      | 3      | 0 <sup>-</sup> | 5374.7796        | 0.0086                           |
| 3                    | 3     | 0     | 0 <sup>-</sup> | $\leftarrow$ | 2    | 2      | 0      | 0 <sup>-</sup> | 5663.0943        | -0.0207                          |
| 10                   | 0     | 10    | 0 <sup>-</sup> | $\leftarrow$ | 9    | 1      | 8      | 0 <sup>-</sup> | 5758.1278        | 0.0023                           |
| 5                    | 2     | 3     | 0 <sup>-</sup> | $\leftarrow$ | 4    | 1      | 3      | 0 <sup>-</sup> | 5903.4147        | -0.0158                          |
| 6                    | 1     | 5     | 0 <sup>-</sup> | $\leftarrow$ | 5    | 0      | 5      | 0 <sup>-</sup> | 6189.6719        | -0.0094                          |
| 5                    | 2     | 4     | 0 <sup>-</sup> | $\leftarrow$ | 4    | 1      | 4      | 0 <sup>-</sup> | 6303.7352        | 0.0038                           |
| 4                    | 3     | 1     | 0 <sup>-</sup> | $\leftarrow$ | 3    | 2      | 1      | 0 <sup>-</sup> | 6487.8235        | -0.0046                          |
| 4                    | 3     | 2     | 0 <sup>-</sup> | $\leftarrow$ | 3    | 2      | 2      | 0 <sup>-</sup> | 6501.7025        | -0.0027                          |
| 6                    | 2     | 4     | 0 <sup>-</sup> | $\leftarrow$ | 5    | 1      | 4      | 0 <sup>-</sup> | 6702.0493        | -0.0089                          |
| 10                   | 1     | 9     | 0 <sup>-</sup> | $\leftarrow$ | 9    | 2      | 7      | 0 <sup>-</sup> | 6706.1321        | -0.0084                          |
| 7                    | 1     | 6     | 0 <sup>-</sup> | $\leftarrow$ | 6    | 0      | 6      | 0 <sup>-</sup> | 7240.6472        | -0.0054                          |
| 6                    | 2     | 5     | 0 <sup>-</sup> | $\leftarrow$ | 5    | 1      | 5      | 0 <sup>-</sup> | 7256.8364        | -0.0120                          |
| 5                    | 3     | 2     | 0 <sup>-</sup> | $\leftarrow$ | 4    | 2      | 2      | 0 <sup>-</sup> | 7302.6053        | 0.0155                           |
| 5                    | 3     | 3     | 0 <sup>-</sup> | $\leftarrow$ | 4    | 2      | 3      | 0 <sup>-</sup> | 7342.9506        | 0.0035                           |
| 7                    | 2     | 5     | 0 <sup>-</sup> | $\leftarrow$ | 6    | 1      | 5      | 0 <sup>-</sup> | 7523.9376        | -0.0078                          |
| $1^- \leftarrow 1^-$ |       |       |                |              |      |        |        |                |                  |                                  |
| 6                    | 1     | 6     | 1 <sup>-</sup> | $\leftarrow$ | 5    | 2      | 4      | 1 <sup>-</sup> | 22525.2759       | 0.0130                           |
| 7                    | 1     | 7     | 1 <sup>-</sup> | $\leftarrow$ | 6    | 2      | 5      | 1 <sup>-</sup> | 3163.2915        | 0.0045                           |
| 5                    | 0     | 5     | 1 <sup>-</sup> | $\leftarrow$ | 4    | 1      | 3      | 1 <sup>-</sup> | 3177.7714        | -0.0023                          |
| 6                    | 1     | 5     | 1 <sup>-</sup> | $\leftarrow$ | 5    | 2      | 3      | 1 <sup>-</sup> | 3454.6936        | -0.0070                          |
| 2                    | 2     | 0     | 1 <sup>-</sup> | $\leftarrow$ | 1    | 1      | 0      | 1 <sup>-</sup> | 3542.3816        | 0.0145                           |
| 2                    | 2     | 1     | 1 <sup>-</sup> | $\leftarrow$ | 1    | 1      | 1      | 1 <sup>-</sup> | 3588.6037        | 0.0095                           |
| 6                    | 0     | 6     | 1 <sup>-</sup> | $\leftarrow$ | 5    | 1      | 4      | 1 <sup>-</sup> | 3806.6007        | -0.0029                          |
| 3                    | 2     | 1     | 1 <sup>-</sup> | $\leftarrow$ | 2    | 1      | 1      | 1 <sup>-</sup> | 4334.0323        | 0.0059                           |
| 9                    | 1     | 9     | 1 <sup>-</sup> | $\leftarrow$ | 8    | 2      | 7      | 1 <sup>-</sup> | 4351.6109        | 0.0074                           |
| 3                    | 2     | 2     | 1 <sup>-</sup> | $\leftarrow$ | 2    | 1      | 2      | 1 <sup>-</sup> | 4467.1017        | -0.0025                          |
| 9                    | 2     | 7     | 1 <sup>-</sup> | $\leftarrow$ | 8    | 3      | 5      | 1 <sup>-</sup> | 4801.6653        | -0.0243                          |
| 4                    | 2     | 2     | 1 <sup>-</sup> | $\leftarrow$ | 3    | 1      | 2      | 1 <sup>-</sup> | 5117.5177        | 0.0059                           |
| 5                    | 1     | 4     | 1 <sup>-</sup> | $\leftarrow$ | 4    | 0      | 4      | 1 <sup>-</sup> | 5173.0425        | 0.0175                           |
| 8                    | 1     | 7     | 1 <sup>-</sup> | $\leftarrow$ | 7    | 2      | 5      | 1 <sup>-</sup> | 5177.9982        | 0.0015                           |
| 9                    | 0     | 9     | 1 <sup>-</sup> | $\leftarrow$ | 8    | 1      | 7      | 1 <sup>-</sup> | 5350.7154        | 0.0021                           |
| 4                    | 2     | 3     | 1 <sup>-</sup> | $\leftarrow$ | 3    | 1      | 3      | 1 <sup>-</sup> | 5369.8701        | -0.0158                          |
| 3                    | 3     | 0     | 1 <sup>-</sup> | $\leftarrow$ | 2    | 2      | 0      | 1 <sup>-</sup> | 5662.6325        | 0.0202                           |

| $J$                                  | $K_a$ | $K_c$ | $v$            | $\leftarrow$ | $J'$ | $K_a'$ | $K_c'$ | $v'$           | $V_{\text{obs}}$ | $V_{\text{obs}}-V_{\text{calc}}$ |
|--------------------------------------|-------|-------|----------------|--------------|------|--------|--------|----------------|------------------|----------------------------------|
| 3                                    | 3     | 1     | 1 <sup>-</sup> | $\leftarrow$ | 2    | 2      | 1      | 1 <sup>-</sup> | 5665.3902        | 0.0172                           |
| 5                                    | 2     | 3     | 1 <sup>-</sup> | $\leftarrow$ | 4    | 1      | 3      | 1 <sup>-</sup> | 5903.1341        | 0.0021                           |
| 9                                    | 1     | 8     | 1 <sup>-</sup> | $\leftarrow$ | 8    | 2      | 6      | 1 <sup>-</sup> | 5971.4096        | 0.0087                           |
| 6                                    | 1     | 5     | 1 <sup>-</sup> | $\leftarrow$ | 5    | 0      | 5      | 1 <sup>-</sup> | 6180.0720        | 0.0131                           |
| 5                                    | 2     | 4     | 1 <sup>-</sup> | $\leftarrow$ | 4    | 1      | 4      | 1 <sup>-</sup> | 6297.0620        | -0.0166                          |
| 4                                    | 3     | 1     | 1 <sup>-</sup> | $\leftarrow$ | 3    | 2      | 1      | 1 <sup>-</sup> | 6486.7018        | 0.0000                           |
| 4                                    | 3     | 2     | 1 <sup>-</sup> | $\leftarrow$ | 3    | 2      | 2      | 1 <sup>-</sup> | 6500.2575        | 0.0072                           |
| 6                                    | 2     | 4     | 1 <sup>-</sup> | $\leftarrow$ | 5    | 1      | 4      | 1 <sup>-</sup> | 6701.9691        | 0.0019                           |
| 7                                    | 1     | 6     | 1 <sup>-</sup> | $\leftarrow$ | 6    | 0      | 6      | 1 <sup>-</sup> | 7230.4469        | 0.0007                           |
| 6                                    | 2     | 5     | 1 <sup>-</sup> | $\leftarrow$ | 5    | 1      | 5      | 1 <sup>-</sup> | 7248.7512        | -0.0166                          |
| 5                                    | 3     | 2     | 1 <sup>-</sup> | $\leftarrow$ | 4    | 2      | 2      | 1 <sup>-</sup> | 7301.3989        | -0.0021                          |
| 5                                    | 3     | 3     | 1 <sup>-</sup> | $\leftarrow$ | 4    | 2      | 3      | 1 <sup>-</sup> | 7340.9479        | 0.0024                           |
| 7                                    | 2     | 5     | 1 <sup>-</sup> | $\leftarrow$ | 6    | 1      | 5      | 1 <sup>-</sup> | 7524.2682        | -0.0163                          |
| <b><sup>c</sup> Q-branch</b>         |       |       |                |              |      |        |        |                |                  |                                  |
| <b>0<sup>+</sup> ← 0<sup>+</sup></b> |       |       |                |              |      |        |        |                |                  |                                  |
| 4                                    | 3     | 2     | 0 <sup>+</sup> | $\leftarrow$ | 4    | 2      | 2      | 0 <sup>+</sup> | 3141.2484        | -0.0085                          |
| 5                                    | 3     | 2     | 0 <sup>+</sup> | $\leftarrow$ | 5    | 2      | 4      | 0 <sup>+</sup> | 3202.9609        | -0.0003                          |
| 6                                    | 3     | 3     | 0 <sup>+</sup> | $\leftarrow$ | 6    | 2      | 5      | 0 <sup>+</sup> | 3235.1181        | 0.0288                           |
| 9                                    | 4     | 6     | 0 <sup>+</sup> | $\leftarrow$ | 9    | 3      | 6      | 0 <sup>+</sup> | 4336.9751        | -0.0328                          |
| 8                                    | 4     | 5     | 0 <sup>+</sup> | $\leftarrow$ | 8    | 3      | 5      | 0 <sup>+</sup> | 4381.6874        | 0.0005                           |
| 7                                    | 4     | 4     | 0 <sup>+</sup> | $\leftarrow$ | 7    | 3      | 4      | 0 <sup>+</sup> | 4409.4637        | 0.0044                           |
| 6                                    | 4     | 3     | 0 <sup>+</sup> | $\leftarrow$ | 6    | 3      | 3      | 0 <sup>+</sup> | 4425.7179        | 0.0060                           |
| 9                                    | 4     | 5     | 0 <sup>+</sup> | $\leftarrow$ | 9    | 3      | 7      | 0 <sup>+</sup> | 4432.4451        | 0.0138                           |
| 6                                    | 4     | 2     | 0 <sup>+</sup> | $\leftarrow$ | 6    | 3      | 4      | 0 <sup>+</sup> | 4434.6534        | 0.0125                           |
| 9                                    | 5     | 4     | 0 <sup>+</sup> | $\leftarrow$ | 9    | 4      | 6      | 0 <sup>+</sup> | 5690.4610        | -0.0136                          |
| 7                                    | 5     | 3     | 0 <sup>+</sup> | $\leftarrow$ | 7    | 4      | 3      | 0 <sup>+</sup> | 5702.6195        | -0.0158                          |
| 7                                    | 5     | 2     | 0 <sup>+</sup> | $\leftarrow$ | 7    | 4      | 4      | 0 <sup>+</sup> | 5703.1508        | -0.0152                          |
| <b>1<sup>+</sup> ← 1<sup>+</sup></b> |       |       |                |              |      |        |        |                |                  |                                  |
| 6                                    | 3     | 4     | 1 <sup>+</sup> | $\leftarrow$ | 6    | 2      | 4      | 1 <sup>+</sup> | 3039.0401        | 0.0154                           |
| 5                                    | 3     | 2     | 1 <sup>+</sup> | $\leftarrow$ | 5    | 2      | 4      | 1 <sup>+</sup> | 3204.5517        | 0.0034                           |
| 6                                    | 3     | 3     | 1 <sup>+</sup> | $\leftarrow$ | 6    | 2      | 5      | 1 <sup>+</sup> | 3236.1019        | 0.0088                           |
| 7                                    | 3     | 4     | 1 <sup>+</sup> | $\leftarrow$ | 7    | 2      | 6      | 1 <sup>+</sup> | 3289.0077        | 0.0264                           |
| 9                                    | 4     | 6     | 1 <sup>+</sup> | $\leftarrow$ | 9    | 3      | 6      | 1 <sup>+</sup> | 4337.0755        | 0.0283                           |
| 8                                    | 4     | 5     | 1 <sup>+</sup> | $\leftarrow$ | 8    | 3      | 5      | 1 <sup>+</sup> | 4382.6204        | 0.0183                           |
| 7                                    | 4     | 4     | 1 <sup>+</sup> | $\leftarrow$ | 7    | 3      | 4      | 1 <sup>+</sup> | 4411.1646        | -0.0013                          |
| 6                                    | 4     | 3     | 1 <sup>+</sup> | $\leftarrow$ | 6    | 3      | 3      | 1 <sup>+</sup> | 4428.1626        | 0.0015                           |
| 7                                    | 4     | 3     | 1 <sup>+</sup> | $\leftarrow$ | 7    | 3      | 5      | 1 <sup>+</sup> | 4433.3955        | -0.0073                          |
| 6                                    | 4     | 2     | 1 <sup>+</sup> | $\leftarrow$ | 6    | 3      | 4      | 1 <sup>+</sup> | 4437.0576        | -0.0046                          |
| 9                                    | 5     | 4     | 1 <sup>+</sup> | $\leftarrow$ | 9    | 4      | 6      | 1 <sup>+</sup> | 5690.9892        | 0.0012                           |
| 8                                    | 5     | 3     | 1 <sup>+</sup> | $\leftarrow$ | 8    | 4      | 5      | 1 <sup>+</sup> | 5699.2288        | -0.0178                          |
| 7                                    | 5     | 3     | 1 <sup>+</sup> | $\leftarrow$ | 7    | 4      | 3      | 1 <sup>+</sup> | 5705.0381        | -0.0232                          |
| 7                                    | 5     | 2     | 1 <sup>+</sup> | $\leftarrow$ | 7    | 4      | 4      | 1 <sup>+</sup> | 5705.5742        | -0.0187                          |
| <b>0<sup>-</sup> ← 0<sup>-</sup></b> |       |       |                |              |      |        |        |                |                  |                                  |
| 5                                    | 3     | 3     | 0 <sup>-</sup> | $\leftarrow$ | 5    | 2      | 3      | 0 <sup>-</sup> | 3099.5254        | 0.0153                           |
| 4                                    | 3     | 2     | 0 <sup>-</sup> | $\leftarrow$ | 4    | 2      | 2      | 0 <sup>-</sup> | 3139.5113        | -0.0097                          |
| 4                                    | 3     | 1     | 0 <sup>-</sup> | $\leftarrow$ | 4    | 2      | 3      | 0 <sup>-</sup> | 3183.5869        | -0.0171                          |
| 5                                    | 3     | 2     | 0 <sup>-</sup> | $\leftarrow$ | 5    | 2      | 4      | 0 <sup>-</sup> | 3201.4140        | -0.0034                          |
| 6                                    | 3     | 3     | 0 <sup>-</sup> | $\leftarrow$ | 6    | 2      | 5      | 0 <sup>-</sup> | 3233.6872        | 0.0107                           |
| 8                                    | 2     | 6     | 0 <sup>-</sup> | $\leftarrow$ | 8    | 1      | 8      | 0 <sup>-</sup> | 3355.3977        | 0.0113                           |
| 8                                    | 4     | 5     | 0 <sup>-</sup> | $\leftarrow$ | 8    | 3      | 5      | 0 <sup>-</sup> | 4378.8167        | -0.0044                          |
| 7                                    | 4     | 4     | 0 <sup>-</sup> | $\leftarrow$ | 7    | 3      | 4      | 0 <sup>-</sup> | 4406.8331        | 0.0037                           |
| 6                                    | 4     | 3     | 0 <sup>-</sup> | $\leftarrow$ | 6    | 3      | 3      | 0 <sup>-</sup> | 4423.2415        | 0.0019                           |
| 6                                    | 4     | 2     | 0 <sup>-</sup> | $\leftarrow$ | 6    | 3      | 4      | 0 <sup>-</sup> | 4432.2409        | 0.0023                           |
| 9                                    | 5     | 4     | 0 <sup>-</sup> | $\leftarrow$ | 9    | 4      | 6      | 0 <sup>-</sup> | 5687.1107        | -0.0051                          |
| 8                                    | 5     | 4     | 0 <sup>-</sup> | $\leftarrow$ | 8    | 4      | 4      | 0 <sup>-</sup> | 5692.9731        | 0.0036                           |
| 8                                    | 5     | 3     | 0 <sup>-</sup> | $\leftarrow$ | 8    | 4      | 5      | 0 <sup>-</sup> | 5694.5885        | 0.0105                           |
| 7                                    | 5     | 3     | 0 <sup>-</sup> | $\leftarrow$ | 7    | 4      | 3      | 0 <sup>-</sup> | 5699.4627        | -0.0030                          |
| 7                                    | 5     | 2     | 0 <sup>-</sup> | $\leftarrow$ | 7    | 4      | 4      | 0 <sup>-</sup> | 5700.0022        | -0.0001                          |
| 9                                    | 6     | 4     | 0 <sup>-</sup> | $\leftarrow$ | 9    | 5      | 4      | 0 <sup>-</sup> | 6965.6744        | -0.0112                          |

| $J$                  | $K_a$ | $K_c$ | $v$            | $\leftarrow$ | $J'$ | $K_a'$ | $K_c'$ | $v'$           | $\nu_{\text{obs}}$ | $\nu_{\text{obs}}-\nu_{\text{calc}}$ |
|----------------------|-------|-------|----------------|--------------|------|--------|--------|----------------|--------------------|--------------------------------------|
| 9                    | 6     | 3     | 0 <sup>-</sup> | $\leftarrow$ | 9    | 5      | 5      | 0 <sup>-</sup> | 6965.7598          | -0.0168                              |
| $1^- \leftarrow 1^-$ |       |       |                |              |      |        |        |                |                    |                                      |
| 6                    | 3     | 4     | 1 <sup>-</sup> | $\leftarrow$ | 6    | 2      | 4      | 1 <sup>-</sup> | 3036.3636          | 0.0012                               |
| 5                    | 3     | 3     | 1 <sup>-</sup> | $\leftarrow$ | 5    | 2      | 3      | 1 <sup>-</sup> | 3102.3497          | 0.0018                               |
| 4                    | 3     | 2     | 1 <sup>-</sup> | $\leftarrow$ | 4    | 2      | 2      | 1 <sup>-</sup> | 3142.2672          | 0.0093                               |
| 4                    | 3     | 1     | 1 <sup>-</sup> | $\leftarrow$ | 4    | 2      | 3      | 1 <sup>-</sup> | 3185.5118          | 0.0144                               |
| 5                    | 3     | 2     | 1 <sup>-</sup> | $\leftarrow$ | 5    | 2      | 4      | 1 <sup>-</sup> | 3202.7603          | 0.0010                               |
| 6                    | 3     | 3     | 1 <sup>-</sup> | $\leftarrow$ | 6    | 2      | 5      | 1 <sup>-</sup> | 3234.5127          | 0.0003                               |
| 7                    | 3     | 4     | 1 <sup>-</sup> | $\leftarrow$ | 7    | 2      | 6      | 1 <sup>-</sup> | 3287.7115          | 0.0087                               |
| 8                    | 4     | 5     | 1 <sup>-</sup> | $\leftarrow$ | 8    | 3      | 5      | 1 <sup>-</sup> | 4379.6429          | 0.0176                               |
| 7                    | 4     | 4     | 1 <sup>-</sup> | $\leftarrow$ | 7    | 3      | 4      | 1 <sup>-</sup> | 4408.2969          | -0.0060                              |
| 6                    | 4     | 3     | 1 <sup>-</sup> | $\leftarrow$ | 6    | 3      | 3      | 1 <sup>-</sup> | 4425.3377          | -0.0006                              |
| 8                    | 4     | 4     | 1 <sup>-</sup> | $\leftarrow$ | 8    | 3      | 6      | 1 <sup>-</sup> | 4428.6356          | 0.0087                               |
| 7                    | 4     | 3     | 1 <sup>-</sup> | $\leftarrow$ | 7    | 3      | 5      | 1 <sup>-</sup> | 4430.7075          | 0.0006                               |
| 6                    | 4     | 2     | 1 <sup>-</sup> | $\leftarrow$ | 6    | 3      | 4      | 1 <sup>-</sup> | 4434.3026          | -0.0067                              |
| 5                    | 4     | 2     | 1 <sup>-</sup> | $\leftarrow$ | 5    | 3      | 2      | 1 <sup>-</sup> | 4434.9203          | 0.0138                               |
| 5                    | 4     | 1     | 1 <sup>-</sup> | $\leftarrow$ | 5    | 3      | 3      | 1 <sup>-</sup> | 4437.9057          | 0.0151                               |
| 9                    | 5     | 4     | 1 <sup>-</sup> | $\leftarrow$ | 9    | 4      | 6      | 1 <sup>-</sup> | 5687.5574          | -0.0111                              |
| 7                    | 5     | 3     | 1 <sup>-</sup> | $\leftarrow$ | 7    | 4      | 3      | 1 <sup>-</sup> | 5701.5310          | -0.0164                              |
| 7                    | 5     | 2     | 1 <sup>-</sup> | $\leftarrow$ | 7    | 4      | 4      | 1 <sup>-</sup> | 5702.0714          | -0.0134                              |
| 6                    | 5     | 1     | 1 <sup>-</sup> | $\leftarrow$ | 6    | 4      | 3      | 1 <sup>-</sup> | 5706.6574          | 0.0057                               |
| 6                    | 5     | 2     | 1 <sup>-</sup> | $\leftarrow$ | 6    | 4      | 2      | 1 <sup>-</sup> | 5706.5152          | 0.0099                               |

**Table S10** Measured frequencies ( $\nu_{\text{obs}}$ ) in MHz and residuals ( $\nu_{\text{obs}} - \nu_{\text{calc}}$ ) in MHz of the rotational transitions of the parent species of Phe-H<sub>2</sub><sup>18</sup>O.

| <b><sup>a</sup> R-branch</b> |       |       |                |              |      |        |        |                |                    |                                      |
|------------------------------|-------|-------|----------------|--------------|------|--------|--------|----------------|--------------------|--------------------------------------|
| $J$                          | $K_a$ | $K_c$ | $v$            | $\leftarrow$ | $J'$ | $K_a'$ | $K_c'$ | $v'$           | $\nu_{\text{obs}}$ | $\nu_{\text{obs}}-\nu_{\text{calc}}$ |
| $0^+ \leftarrow 1^+$         |       |       |                |              |      |        |        |                |                    |                                      |
| 3                            | 0     | 3     | 0 <sup>+</sup> | $\leftarrow$ | 2    | 0      | 2      | 1 <sup>+</sup> | 2440.9848          | 0.0028                               |
| 3                            | 1     | 2     | 0 <sup>+</sup> | $\leftarrow$ | 2    | 1      | 1      | 1 <sup>+</sup> | 2514.7981          | 0.0214                               |
| 4                            | 1     | 4     | 0 <sup>+</sup> | $\leftarrow$ | 3    | 1      | 3      | 1 <sup>+</sup> | 3177.0547          | 0.0004                               |
| 4                            | 0     | 4     | 0 <sup>+</sup> | $\leftarrow$ | 3    | 0      | 3      | 1 <sup>+</sup> | 3247.2968          | 0.0114                               |
| 4                            | 2     | 3     | 0 <sup>+</sup> | $\leftarrow$ | 3    | 2      | 2      | 1 <sup>+</sup> | 3267.7019          | 0.0017                               |
| 4                            | 2     | 2     | 0 <sup>+</sup> | $\leftarrow$ | 3    | 2      | 1      | 1 <sup>+</sup> | 3290.5811          | -0.0077                              |
| 4                            | 1     | 3     | 0 <sup>+</sup> | $\leftarrow$ | 3    | 1      | 2      | 1 <sup>+</sup> | 3353.9765          | 0.0090                               |
| 5                            | 1     | 5     | 0 <sup>+</sup> | $\leftarrow$ | 4    | 1      | 4      | 1 <sup>+</sup> | 3969.8804          | 0.0000                               |
| 5                            | 0     | 5     | 0 <sup>+</sup> | $\leftarrow$ | 4    | 0      | 4      | 1 <sup>+</sup> | 4045.2622          | 0.0043                               |
| 5                            | 2     | 4     | 0 <sup>+</sup> | $\leftarrow$ | 4    | 2      | 3      | 1 <sup>+</sup> | 4084.9128          | 0.0156                               |
| 5                            | 3     | 2     | 0 <sup>+</sup> | $\leftarrow$ | 4    | 3      | 1      | 1 <sup>+</sup> | 4097.4688          | 0.0037                               |
| 5                            | 2     | 3     | 0 <sup>+</sup> | $\leftarrow$ | 4    | 2      | 2      | 1 <sup>+</sup> | 4129.5140          | -0.0017                              |
| 5                            | 1     | 4     | 0 <sup>+</sup> | $\leftarrow$ | 4    | 1      | 3      | 1 <sup>+</sup> | 4190.2546          | -0.0035                              |
| 6                            | 1     | 6     | 0 <sup>+</sup> | $\leftarrow$ | 5    | 1      | 5      | 1 <sup>+</sup> | 4760.4366          | -0.0107                              |
| 6                            | 0     | 6     | 0 <sup>+</sup> | $\leftarrow$ | 5    | 0      | 5      | 1 <sup>+</sup> | 4834.3405          | -0.0071                              |
| 6                            | 2     | 5     | 0 <sup>+</sup> | $\leftarrow$ | 5    | 2      | 4      | 1 <sup>+</sup> | 4899.9343          | -0.0036                              |
| 6                            | 4     | 3     | 0 <sup>+</sup> | $\leftarrow$ | 5    | 4      | 2      | 1 <sup>+</sup> | 4915.4891          | 0.0079                               |
| 6                            | 4     | 2     | 0 <sup>+</sup> | $\leftarrow$ | 5    | 4      | 1      | 1 <sup>+</sup> | 4915.5598          | 0.0024                               |
| 6                            | 3     | 4     | 0 <sup>+</sup> | $\leftarrow$ | 5    | 3      | 3      | 1 <sup>+</sup> | 4919.9110          | -0.0037                              |
| 6                            | 3     | 3     | 0 <sup>+</sup> | $\leftarrow$ | 5    | 3      | 2      | 1 <sup>+</sup> | 4924.1613          | 0.0237                               |
| 6                            | 2     | 4     | 0 <sup>+</sup> | $\leftarrow$ | 5    | 2      | 3      | 1 <sup>+</sup> | 4974.6069          | -0.0110                              |
| 6                            | 1     | 5     | 0 <sup>+</sup> | $\leftarrow$ | 5    | 1      | 4      | 1 <sup>+</sup> | 5022.2194          | -0.0124                              |
| 7                            | 1     | 7     | 0 <sup>+</sup> | $\leftarrow$ | 6    | 1      | 6      | 1 <sup>+</sup> | 5548.5649          | -0.0121                              |
| 7                            | 0     | 7     | 0 <sup>+</sup> | $\leftarrow$ | 6    | 0      | 6      | 1 <sup>+</sup> | 5615.3237          | -0.0089                              |
| 7                            | 2     | 6     | 0 <sup>+</sup> | $\leftarrow$ | 6    | 2      | 5      | 1 <sup>+</sup> | 5712.2170          | -0.0128                              |
| 7                            | 4     | 3     | 0 <sup>+</sup> | $\leftarrow$ | 6    | 4      | 2      | 1 <sup>+</sup> | 5739.7654          | 0.0156                               |
| 7                            | 3     | 5     | 0 <sup>+</sup> | $\leftarrow$ | 6    | 3      | 4      | 1 <sup>+</sup> | 5743.8483          | -0.0136                              |
| 7                            | 3     | 4     | 0 <sup>+</sup> | $\leftarrow$ | 6    | 3      | 3      | 1 <sup>+</sup> | 5753.2244          | 0.0027                               |
| 7                            | 2     | 5     | 0 <sup>+</sup> | $\leftarrow$ | 6    | 2      | 4      | 1 <sup>+</sup> | 5824.0901          | -0.0040                              |

| $J$                  | $K_a$ | $K_c$ | $v$            | $\leftarrow$ | $J'$ | $K_a'$ | $K_c'$ | $v'$           | $V_{\text{obs}}$ | $V_{\text{obs}}-V_{\text{calc}}$ |
|----------------------|-------|-------|----------------|--------------|------|--------|--------|----------------|------------------|----------------------------------|
| 7                    | 1     | 6     | 0 <sup>+</sup> | $\leftarrow$ | 6    | 1      | 5      | 1 <sup>+</sup> | 5848.4701        | 0.0051                           |
| 8                    | 1     | 8     | 0 <sup>+</sup> | $\leftarrow$ | 7    | 1      | 7      | 1 <sup>+</sup> | 6334.2832        | 0.0026                           |
| 8                    | 0     | 8     | 0 <sup>+</sup> | $\leftarrow$ | 7    | 0      | 7      | 1 <sup>+</sup> | 6390.4814        | -0.0001                          |
| 8                    | 2     | 7     | 0 <sup>+</sup> | $\leftarrow$ | 7    | 2      | 6      | 1 <sup>+</sup> | 6521.3033        | -0.0100                          |
| 8                    | 3     | 6     | 0 <sup>+</sup> | $\leftarrow$ | 7    | 3      | 5      | 1 <sup>+</sup> | 6567.1834        | -0.0071                          |
| 8                    | 3     | 5     | 0 <sup>+</sup> | $\leftarrow$ | 7    | 3      | 4      | 1 <sup>+</sup> | 6585.4895        | 0.0014                           |
| 9                    | 1     | 9     | 0 <sup>+</sup> | $\leftarrow$ | 8    | 1      | 8      | 1 <sup>+</sup> | 7117.6687        | -0.0105                          |
| 9                    | 0     | 9     | 0 <sup>+</sup> | $\leftarrow$ | 8    | 0      | 8      | 1 <sup>+</sup> | 7162.2702        | 0.0032                           |
| 9                    | 2     | 8     | 0 <sup>+</sup> | $\leftarrow$ | 8    | 2      | 7      | 1 <sup>+</sup> | 7326.8946        | -0.0015                          |
| 10                   | 0     | 10    | 0 <sup>+</sup> | $\leftarrow$ | 9    | 0      | 9      | 1 <sup>+</sup> | 7932.7989        | 0.0184                           |
| $1^+ \leftarrow 0^+$ |       |       |                |              |      |        |        |                |                  |                                  |
| 3                    | 1     | 3     | 1 <sup>+</sup> | $\leftarrow$ | 2    | 1      | 2      | 0 <sup>+</sup> | 2394.4627        | 0.0241                           |
| 4                    | 1     | 4     | 1 <sup>+</sup> | $\leftarrow$ | 3    | 1      | 3      | 0 <sup>+</sup> | 3186.9457        | 0.0104                           |
| 4                    | 0     | 4     | 1 <sup>+</sup> | $\leftarrow$ | 3    | 0      | 3      | 0 <sup>+</sup> | 3252.9968        | 0.0073                           |
| 4                    | 2     | 3     | 1 <sup>+</sup> | $\leftarrow$ | 3    | 2      | 2      | 0 <sup>+</sup> | 3274.1085        | -0.0025                          |
| 4                    | 2     | 2     | 1 <sup>+</sup> | $\leftarrow$ | 3    | 2      | 1      | 0 <sup>+</sup> | 3296.4201        | 0.0133                           |
| 4                    | 1     | 3     | 1 <sup>+</sup> | $\leftarrow$ | 3    | 1      | 2      | 0 <sup>+</sup> | 3354.4981        | -0.0096                          |
| 5                    | 1     | 5     | 1 <sup>+</sup> | $\leftarrow$ | 4    | 1      | 4      | 0 <sup>+</sup> | 3977.4601        | 0.0009                           |
| 5                    | 0     | 5     | 1 <sup>+</sup> | $\leftarrow$ | 4    | 0      | 4      | 0 <sup>+</sup> | 4048.3446        | 0.0126                           |
| 5                    | 2     | 4     | 1 <sup>+</sup> | $\leftarrow$ | 4    | 2      | 3      | 0 <sup>+</sup> | 4086.5828        | -0.0107                          |
| 5                    | 2     | 3     | 1 <sup>+</sup> | $\leftarrow$ | 4    | 2      | 2      | 0 <sup>+</sup> | 4130.1641        | 0.0084                           |
| 5                    | 1     | 4     | 1 <sup>+</sup> | $\leftarrow$ | 4    | 1      | 3      | 0 <sup>+</sup> | 4185.6267        | 0.0047                           |
| 6                    | 1     | 6     | 1 <sup>+</sup> | $\leftarrow$ | 5    | 1      | 5      | 0 <sup>+</sup> | 4765.8966        | -0.0057                          |
| 6                    | 0     | 6     | 1 <sup>+</sup> | $\leftarrow$ | 5    | 0      | 5      | 0 <sup>+</sup> | 4835.6272        | 0.0092                           |
| 6                    | 2     | 5     | 1 <sup>+</sup> | $\leftarrow$ | 5    | 2      | 4      | 0 <sup>+</sup> | 4897.3984        | -0.0116                          |
| 6                    | 4     | 2     | 1 <sup>+</sup> | $\leftarrow$ | 5    | 4      | 1      | 0 <sup>+</sup> | 4917.9105        | 0.0055                           |
| 6                    | 3     | 3     | 1 <sup>+</sup> | $\leftarrow$ | 5    | 3      | 2      | 0 <sup>+</sup> | 4923.3871        | -0.0133                          |
| 6                    | 2     | 4     | 1 <sup>+</sup> | $\leftarrow$ | 5    | 2      | 3      | 0 <sup>+</sup> | 4970.7972        | 0.0114                           |
| 6                    | 1     | 5     | 1 <sup>+</sup> | $\leftarrow$ | 5    | 1      | 4      | 0 <sup>+</sup> | 5013.7282        | 0.0133                           |
| 7                    | 1     | 7     | 1 <sup>+</sup> | $\leftarrow$ | 6    | 1      | 6      | 0 <sup>+</sup> | 5552.2492        | -0.0053                          |
| 7                    | 0     | 7     | 1 <sup>+</sup> | $\leftarrow$ | 6    | 0      | 6      | 0 <sup>+</sup> | 5615.7554        | -0.0050                          |
| 7                    | 2     | 6     | 1 <sup>+</sup> | $\leftarrow$ | 6    | 2      | 5      | 0 <sup>+</sup> | 5706.4506        | 0.0107                           |
| 7                    | 3     | 5     | 1 <sup>+</sup> | $\leftarrow$ | 6    | 3      | 4      | 0 <sup>+</sup> | 5739.4293        | -0.0048                          |
| 7                    | 3     | 4     | 1 <sup>+</sup> | $\leftarrow$ | 6    | 3      | 3      | 0 <sup>+</sup> | 5748.8920        | -0.0077                          |
| 7                    | 2     | 5     | 1 <sup>+</sup> | $\leftarrow$ | 6    | 2      | 4      | 0 <sup>+</sup> | 5817.4063        | 0.0051                           |
| 7                    | 1     | 6     | 1 <sup>+</sup> | $\leftarrow$ | 6    | 1      | 5      | 0 <sup>+</sup> | 5837.9247        | 0.0026                           |
| 8                    | 1     | 8     | 1 <sup>+</sup> | $\leftarrow$ | 7    | 1      | 7      | 0 <sup>+</sup> | 6336.5751        | -0.0143                          |
| 8                    | 0     | 8     | 1 <sup>+</sup> | $\leftarrow$ | 7    | 0      | 7      | 0 <sup>+</sup> | 6390.6066        | -0.0207                          |
| 8                    | 2     | 7     | 1 <sup>+</sup> | $\leftarrow$ | 7    | 2      | 6      | 0 <sup>+</sup> | 6513.4821        | -0.0034                          |
| 8                    | 4     | 5     | 1 <sup>+</sup> | $\leftarrow$ | 7    | 4      | 4      | 0 <sup>+</sup> | 6558.2387        | 0.0030                           |
| 8                    | 4     | 4     | 1 <sup>+</sup> | $\leftarrow$ | 7    | 4      | 3      | 0 <sup>+</sup> | 6558.9461        | 0.0069                           |
| 8                    | 3     | 6     | 1 <sup>+</sup> | $\leftarrow$ | 7    | 3      | 5      | 0 <sup>+</sup> | 6560.7186        | 0.0214                           |
| 8                    | 3     | 5     | 1 <sup>+</sup> | $\leftarrow$ | 7    | 3      | 4      | 0 <sup>+</sup> | 6579.3270        | 0.0019                           |
| 8                    | 2     | 6     | 1 <sup>+</sup> | $\leftarrow$ | 7    | 2      | 5      | 0 <sup>+</sup> | 6667.7865        | -0.0253                          |
| 9                    | 1     | 9     | 1 <sup>+</sup> | $\leftarrow$ | 8    | 1      | 8      | 0 <sup>+</sup> | 7119.0409        | -0.0061                          |
| 9                    | 0     | 9     | 1 <sup>+</sup> | $\leftarrow$ | 8    | 0      | 8      | 0 <sup>+</sup> | 7162.3854        | -0.0221                          |
| 9                    | 2     | 7     | 1 <sup>+</sup> | $\leftarrow$ | 8    | 2      | 6      | 0 <sup>+</sup> | 7519.0799        | 0.0048                           |
| 4                    | 4     | 0     | 1 <sup>+</sup> | $\leftarrow$ | 3    | 3      | 0      | 0 <sup>+</sup> | 7529.7090        | 0.0064                           |
| 10                   | 1     | 10    | 1 <sup>+</sup> | $\leftarrow$ | 9    | 1      | 9      | 0 <sup>+</sup> | 7899.8312        | 0.0167                           |
| 10                   | 0     | 10    | 1 <sup>+</sup> | $\leftarrow$ | 9    | 0      | 9      | 0 <sup>+</sup> | 7932.9652        | 0.0175                           |
| $0^- \leftarrow 1^-$ |       |       |                |              |      |        |        |                |                  |                                  |
| 3                    | 1     | 3     | 0 <sup>-</sup> | $\leftarrow$ | 2    | 1      | 2      | 1 <sup>-</sup> | 2383.1898        | -0.0080                          |
| 3                    | 0     | 3     | 0 <sup>-</sup> | $\leftarrow$ | 2    | 0      | 2      | 1 <sup>-</sup> | 2441.7149        | 0.0008                           |
| 3                    | 1     | 2     | 0 <sup>-</sup> | $\leftarrow$ | 2    | 1      | 1      | 1 <sup>-</sup> | 2515.5103        | 0.0196                           |
| 4                    | 1     | 4     | 0 <sup>-</sup> | $\leftarrow$ | 3    | 1      | 3      | 1 <sup>-</sup> | 3177.7433        | -0.0068                          |
| 4                    | 0     | 4     | 0 <sup>-</sup> | $\leftarrow$ | 3    | 0      | 3      | 1 <sup>-</sup> | 3247.7771        | 0.0051                           |
| 4                    | 2     | 3     | 0 <sup>-</sup> | $\leftarrow$ | 3    | 2      | 2      | 1 <sup>-</sup> | 3268.3522        | 0.0045                           |
| 4                    | 2     | 2     | 0 <sup>-</sup> | $\leftarrow$ | 3    | 2      | 1      | 1 <sup>-</sup> | 3291.3099        | -0.0014                          |
| 4                    | 1     | 3     | 0 <sup>-</sup> | $\leftarrow$ | 3    | 1      | 2      | 1 <sup>-</sup> | 3354.3674        | 0.0110                           |

| $J$ | $K_a$ | $K_c$ | $v$            | $\leftarrow$ | $J'$                 | $K_a'$ | $K_c'$ | $v'$           | $V_{obs}$ | $V_{obs}-V_{calc}$ |
|-----|-------|-------|----------------|--------------|----------------------|--------|--------|----------------|-----------|--------------------|
| 5   | 1     | 5     | 0 <sup>-</sup> | $\leftarrow$ | 4                    | 1      | 4      | 1 <sup>-</sup> | 3970.3877 | 0.0013             |
| 5   | 0     | 5     | 0 <sup>-</sup> | $\leftarrow$ | 4                    | 0      | 4      | 1 <sup>-</sup> | 4045.5137 | 0.0084             |
| 5   | 2     | 4     | 0 <sup>-</sup> | $\leftarrow$ | 4                    | 2      | 3      | 1 <sup>-</sup> | 4085.2469 | 0.0131             |
| 5   | 3     | 3     | 0 <sup>-</sup> | $\leftarrow$ | 4                    | 3      | 2      | 1 <sup>-</sup> | 4096.4439 | -0.0043            |
| 5   | 3     | 2     | 0 <sup>-</sup> | $\leftarrow$ | 4                    | 3      | 1      | 1 <sup>-</sup> | 4098.0642 | 0.0032             |
| 5   | 1     | 4     | 0 <sup>-</sup> | $\leftarrow$ | 4                    | 1      | 3      | 1 <sup>-</sup> | 4190.3487 | 0.0017             |
| 6   | 1     | 6     | 0 <sup>-</sup> | $\leftarrow$ | 5                    | 1      | 5      | 1 <sup>-</sup> | 4760.7698 | -0.0002            |
| 6   | 0     | 6     | 0 <sup>-</sup> | $\leftarrow$ | 5                    | 0      | 5      | 1 <sup>-</sup> | 4834.3405 | -0.0071            |
| 6   | 2     | 5     | 0 <sup>-</sup> | $\leftarrow$ | 5                    | 2      | 4      | 1 <sup>-</sup> | 4900.0044 | 0.0066             |
| 6   | 4     | 3     | 0 <sup>-</sup> | $\leftarrow$ | 5                    | 4      | 2      | 1 <sup>-</sup> | 4915.9950 | 0.0055             |
| 6   | 4     | 2     | 0 <sup>-</sup> | $\leftarrow$ | 5                    | 4      | 1      | 1 <sup>-</sup> | 4916.0742 | 0.0076             |
| 6   | 3     | 4     | 0 <sup>-</sup> | $\leftarrow$ | 5                    | 3      | 3      | 1 <sup>-</sup> | 4920.2117 | -0.0001            |
| 6   | 3     | 3     | 0 <sup>-</sup> | $\leftarrow$ | 5                    | 3      | 2      | 1 <sup>-</sup> | 4924.4856 | 0.0136             |
| 6   | 2     | 4     | 0 <sup>-</sup> | $\leftarrow$ | 5                    | 2      | 3      | 1 <sup>-</sup> | 4974.9438 | -0.0129            |
| 6   | 1     | 5     | 0 <sup>-</sup> | $\leftarrow$ | 5                    | 1      | 4      | 1 <sup>-</sup> | 5022.0919 | -0.0155            |
| 7   | 1     | 7     | 0 <sup>-</sup> | $\leftarrow$ | 6                    | 1      | 6      | 1 <sup>-</sup> | 5548.7315 | -0.0044            |
| 7   | 0     | 7     | 0 <sup>-</sup> | $\leftarrow$ | 6                    | 0      | 6      | 1 <sup>-</sup> | 5615.2216 | -0.0063            |
| 7   | 2     | 6     | 0 <sup>-</sup> | $\leftarrow$ | 6                    | 2      | 5      | 1 <sup>-</sup> | 5712.0674 | -0.0126            |
| 7   | 5     | 2     | 0 <sup>-</sup> | $\leftarrow$ | 6                    | 5      | 3      | 1 <sup>-</sup> | 5735.0751 | 0.0055             |
| 7   | 5     | 3     | 0 <sup>-</sup> | $\leftarrow$ | 6                    | 5      | 2      | 1 <sup>-</sup> | 5735.0751 | 0.0055             |
| 7   | 4     | 4     | 0 <sup>-</sup> | $\leftarrow$ | 6                    | 4      | 3      | 1 <sup>-</sup> | 5739.7654 | 0.0156             |
| 7   | 4     | 3     | 0 <sup>-</sup> | $\leftarrow$ | 6                    | 4      | 2      | 1 <sup>-</sup> | 5740.0134 | 0.0134             |
| 7   | 3     | 5     | 0 <sup>-</sup> | $\leftarrow$ | 6                    | 3      | 4      | 1 <sup>-</sup> | 5743.9603 | -0.0134            |
| 7   | 3     | 4     | 0 <sup>-</sup> | $\leftarrow$ | 6                    | 3      | 3      | 1 <sup>-</sup> | 5753.4212 | 0.0011             |
| 7   | 2     | 5     | 0 <sup>-</sup> | $\leftarrow$ | 6                    | 2      | 4      | 1 <sup>-</sup> | 5824.4085 | -0.0088            |
| 7   | 1     | 6     | 0 <sup>-</sup> | $\leftarrow$ | 6                    | 1      | 5      | 1 <sup>-</sup> | 5848.2350 | -0.0091            |
| 8   | 1     | 8     | 0 <sup>-</sup> | $\leftarrow$ | 7                    | 1      | 7      | 1 <sup>-</sup> | 6334.2832 | 0.0026             |
| 8   | 0     | 8     | 0 <sup>-</sup> | $\leftarrow$ | 7                    | 0      | 7      | 1 <sup>-</sup> | 6390.2729 | -0.0009            |
| 8   | 2     | 7     | 0 <sup>-</sup> | $\leftarrow$ | 7                    | 2      | 6      | 1 <sup>-</sup> | 6521.0193 | -0.0177            |
| 8   | 5     | 3     | 0 <sup>-</sup> | $\leftarrow$ | 7                    | 5      | 2      | 1 <sup>-</sup> | 6558.2387 | 0.0030             |
| 8   | 5     | 4     | 0 <sup>-</sup> | $\leftarrow$ | 7                    | 5      | 3      | 1 <sup>-</sup> | 6558.2387 | 0.0030             |
| 8   | 4     | 5     | 0 <sup>-</sup> | $\leftarrow$ | 7                    | 4      | 4      | 1 <sup>-</sup> | 6563.6911 | -0.0120            |
| 8   | 4     | 4     | 0 <sup>-</sup> | $\leftarrow$ | 7                    | 4      | 3      | 1 <sup>-</sup> | 6564.3883 | -0.0169            |
| 8   | 3     | 6     | 0 <sup>-</sup> | $\leftarrow$ | 7                    | 3      | 5      | 1 <sup>-</sup> | 6567.1834 | -0.0071            |
| 8   | 3     | 5     | 0 <sup>-</sup> | $\leftarrow$ | 7                    | 3      | 4      | 1 <sup>-</sup> | 6585.7075 | -0.0066            |
| 8   | 1     | 7     | 0 <sup>-</sup> | $\leftarrow$ | 7                    | 1      | 6      | 1 <sup>-</sup> | 6667.4251 | 0.0162             |
| 8   | 2     | 6     | 0 <sup>-</sup> | $\leftarrow$ | 7                    | 2      | 5      | 1 <sup>-</sup> | 6675.6483 | 0.0151             |
| 9   | 1     | 9     | 0 <sup>-</sup> | $\leftarrow$ | 8                    | 1      | 8      | 1 <sup>-</sup> | 7117.5855 | -0.0063            |
| 9   | 0     | 9     | 0 <sup>-</sup> | $\leftarrow$ | 8                    | 0      | 8      | 1 <sup>-</sup> | 7161.9965 | 0.0050             |
| 9   | 2     | 8     | 0 <sup>-</sup> | $\leftarrow$ | 8                    | 2      | 7      | 1 <sup>-</sup> | 7326.5588 | -0.0141            |
| 9   | 6     | 3     | 0 <sup>-</sup> | $\leftarrow$ | 8                    | 6      | 2      | 1 <sup>-</sup> | 7376.7573 | -0.0057            |
| 9   | 2     | 7     | 0 <sup>-</sup> | $\leftarrow$ | 8                    | 2      | 6      | 1 <sup>-</sup> | 7525.7225 | 0.0079             |
| 10  | 1     | 10    | 0 <sup>-</sup> | $\leftarrow$ | 9                    | 1      | 9      | 1 <sup>-</sup> | 7898.9037 | 0.0071             |
| 10  | 0     | 10    | 0 <sup>-</sup> | $\leftarrow$ | 9                    | 0      | 9      | 1 <sup>-</sup> | 7932.4787 | 0.0197             |
|     |       |       |                |              | $1^- \leftarrow 0^-$ |        |        |                |           |                    |
| 3   | 1     | 3     | 1 <sup>-</sup> | $\leftarrow$ | 2                    | 1      | 2      | 0 <sup>-</sup> | 2393.6155 | 0.0253             |
| 3   | 0     | 3     | 1 <sup>-</sup> | $\leftarrow$ | 2                    | 0      | 2      | 0 <sup>-</sup> | 2449.3408 | 0.0046             |
| 3   | 1     | 2     | 1 <sup>-</sup> | $\leftarrow$ | 2                    | 1      | 1      | 0 <sup>-</sup> | 2520.7830 | -0.0031            |
| 4   | 1     | 4     | 1 <sup>-</sup> | $\leftarrow$ | 3                    | 1      | 3      | 0 <sup>-</sup> | 3186.2574 | 0.0118             |
| 4   | 0     | 4     | 1 <sup>-</sup> | $\leftarrow$ | 3                    | 0      | 3      | 0 <sup>-</sup> | 3252.7199 | 0.0040             |
| 4   | 2     | 3     | 1 <sup>-</sup> | $\leftarrow$ | 3                    | 2      | 2      | 0 <sup>-</sup> | 3273.8943 | 0.0096             |
| 4   | 2     | 2     | 1 <sup>-</sup> | $\leftarrow$ | 3                    | 2      | 1      | 0 <sup>-</sup> | 3296.3438 | 0.0098             |
| 4   | 1     | 3     | 1 <sup>-</sup> | $\leftarrow$ | 3                    | 1      | 2      | 0 <sup>-</sup> | 3354.8895 | -0.0092            |
| 5   | 1     | 5     | 1 <sup>-</sup> | $\leftarrow$ | 4                    | 1      | 4      | 0 <sup>-</sup> | 3976.9229 | 0.0013             |
| 5   | 0     | 5     | 1 <sup>-</sup> | $\leftarrow$ | 4                    | 0      | 4      | 0 <sup>-</sup> | 4048.2090 | 0.0075             |
| 5   | 2     | 4     | 1 <sup>-</sup> | $\leftarrow$ | 4                    | 2      | 3      | 0 <sup>-</sup> | 4086.7451 | -0.0080            |
| 5   | 3     | 3     | 1 <sup>-</sup> | $\leftarrow$ | 4                    | 3      | 2      | 0 <sup>-</sup> | 4100.0277 | -0.0009            |
| 5   | 3     | 2     | 1 <sup>-</sup> | $\leftarrow$ | 4                    | 3      | 1      | 0 <sup>-</sup> | 4101.6529 | 0.0130             |
| 5   | 1     | 4     | 1 <sup>-</sup> | $\leftarrow$ | 4                    | 1      | 3      | 0 <sup>-</sup> | 4186.4588 | 0.0016             |

| $J$                                  | $K_a$ | $K_c$ | $v$            | $\leftarrow$ | $J'$ | $K_a'$ | $K_c'$ | $v'$           | V <sub>obs</sub> | V <sub>obs</sub> -V <sub>calc</sub> |
|--------------------------------------|-------|-------|----------------|--------------|------|--------|--------|----------------|------------------|-------------------------------------|
| 6                                    | 1     | 6     | 1 <sup>-</sup> | $\leftarrow$ | 5    | 1      | 5      | 0 <sup>-</sup> | 4765.4857        | -0.0056                             |
| 6                                    | 0     | 6     | 1 <sup>-</sup> | $\leftarrow$ | 5    | 0      | 5      | 0 <sup>-</sup> | 4835.5394        | 0.0071                              |
| 6                                    | 2     | 5     | 1 <sup>-</sup> | $\leftarrow$ | 5    | 2      | 4      | 0 <sup>-</sup> | 4897.8929        | -0.0094                             |
| 6                                    | 4     | 3     | 1 <sup>-</sup> | $\leftarrow$ | 5    | 4      | 2      | 0 <sup>-</sup> | 4918.0593        | -0.0002                             |
| 6                                    | 4     | 2     | 1 <sup>-</sup> | $\leftarrow$ | 5    | 4      | 1      | 0 <sup>-</sup> | 4918.1426        | 0.0064                              |
| 6                                    | 3     | 4     | 1 <sup>-</sup> | $\leftarrow$ | 5    | 3      | 3      | 0 <sup>-</sup> | 4919.6118        | -0.0047                             |
| 6                                    | 3     | 3     | 1 <sup>-</sup> | $\leftarrow$ | 5    | 3      | 2      | 0 <sup>-</sup> | 4923.8821        | -0.0101                             |
| 6                                    | 2     | 4     | 1 <sup>-</sup> | $\leftarrow$ | 5    | 2      | 3      | 0 <sup>-</sup> | 4971.7085        | 0.0061                              |
| 6                                    | 1     | 5     | 1 <sup>-</sup> | $\leftarrow$ | 5    | 1      | 4      | 0 <sup>-</sup> | 5014.8782        | 0.0102                              |
| 7                                    | 1     | 7     | 1 <sup>-</sup> | $\leftarrow$ | 6    | 1      | 6      | 0 <sup>-</sup> | 5551.9283        | -0.0052                             |
| 7                                    | 0     | 7     | 1 <sup>-</sup> | $\leftarrow$ | 6    | 0      | 6      | 0 <sup>-</sup> | 5615.6371        | -0.0016                             |
| 7                                    | 2     | 6     | 1 <sup>-</sup> | $\leftarrow$ | 6    | 2      | 5      | 0 <sup>-</sup> | 5707.1853        | 0.0095                              |
| 7                                    | 5     | 3     | 1 <sup>-</sup> | $\leftarrow$ | 6    | 5      | 2      | 0 <sup>-</sup> | 5735.8336        | -0.0090                             |
| 7                                    | 5     | 2     | 1 <sup>-</sup> | $\leftarrow$ | 6    | 5      | 1      | 0 <sup>-</sup> | 5735.8336        | -0.0090                             |
| 7                                    | 4     | 4     | 1 <sup>-</sup> | $\leftarrow$ | 6    | 4      | 3      | 0 <sup>-</sup> | 5737.7646        | -0.0102                             |
| 7                                    | 4     | 3     | 1 <sup>-</sup> | $\leftarrow$ | 6    | 4      | 2      | 0 <sup>-</sup> | 5738.0107        | -0.0185                             |
| 7                                    | 3     | 5     | 1 <sup>-</sup> | $\leftarrow$ | 6    | 3      | 4      | 0 <sup>-</sup> | 5740.2213        | 0.0012                              |
| 7                                    | 3     | 4     | 1 <sup>-</sup> | $\leftarrow$ | 6    | 3      | 3      | 0 <sup>-</sup> | 5749.7424        | -0.0085                             |
| 7                                    | 2     | 5     | 1 <sup>-</sup> | $\leftarrow$ | 6    | 2      | 4      | 0 <sup>-</sup> | 5818.6732        | 0.0084                              |
| 7                                    | 1     | 6     | 1 <sup>-</sup> | $\leftarrow$ | 6    | 1      | 5      | 0 <sup>-</sup> | 5839.2281        | 0.0069                              |
| 8                                    | 1     | 8     | 1 <sup>-</sup> | $\leftarrow$ | 7    | 1      | 7      | 0 <sup>-</sup> | 6336.3103        | -0.0090                             |
| 8                                    | 0     | 8     | 1 <sup>-</sup> | $\leftarrow$ | 7    | 0      | 7      | 0 <sup>-</sup> | 6390.4125        | -0.0156                             |
| 8                                    | 2     | 7     | 1 <sup>-</sup> | $\leftarrow$ | 7    | 2      | 6      | 0 <sup>-</sup> | 6514.3611        | 0.0025                              |
| 8                                    | 4     | 5     | 1 <sup>-</sup> | $\leftarrow$ | 7    | 4      | 4      | 0 <sup>-</sup> | 6559.1837        | 0.0051                              |
| 8                                    | 4     | 4     | 1 <sup>-</sup> | $\leftarrow$ | 7    | 4      | 3      | 0 <sup>-</sup> | 6559.8833        | 0.0104                              |
| 8                                    | 3     | 6     | 1 <sup>-</sup> | $\leftarrow$ | 7    | 3      | 5      | 0 <sup>-</sup> | 6561.6950        | 0.0145                              |
| 8                                    | 3     | 5     | 1 <sup>-</sup> | $\leftarrow$ | 7    | 3      | 4      | 0 <sup>-</sup> | 6580.4332        | 0.0044                              |
| 8                                    | 1     | 7     | 1 <sup>-</sup> | $\leftarrow$ | 7    | 1      | 6      | 0 <sup>-</sup> | 6658.2222        | -0.0215                             |
| 8                                    | 2     | 6     | 1 <sup>-</sup> | $\leftarrow$ | 7    | 2      | 5      | 0 <sup>-</sup> | 6669.2254        | -0.0162                             |
| 9                                    | 1     | 9     | 1 <sup>-</sup> | $\leftarrow$ | 8    | 1      | 8      | 0 <sup>-</sup> | 7118.7893        | -0.0049                             |
| 9                                    | 2     | 8     | 1 <sup>-</sup> | $\leftarrow$ | 8    | 2      | 7      | 0 <sup>-</sup> | 7319.1665        | -0.0090                             |
| 9                                    | 6     | 4     | 1 <sup>-</sup> | $\leftarrow$ | 8    | 6      | 3      | 0 <sup>-</sup> | 7372.8700        | 0.0022                              |
| 9                                    | 6     | 3     | 1 <sup>-</sup> | $\leftarrow$ | 8    | 6      | 2      | 0 <sup>-</sup> | 7372.8700        | 0.0022                              |
| 9                                    | 2     | 7     | 1 <sup>-</sup> | $\leftarrow$ | 8    | 2      | 6      | 0 <sup>-</sup> | 7520.4962        | 0.0038                              |
| 10                                   | 1     | 10    | 1 <sup>-</sup> | $\leftarrow$ | 9    | 1      | 9      | 0 <sup>-</sup> | 7899.5698        | 0.0137                              |
| 10                                   | 0     | 10    | 1 <sup>-</sup> | $\leftarrow$ | 9    | 0      | 9      | 0 <sup>-</sup> | 7932.6284        | 0.0186                              |
| 9                                    | 0     | 9     | 1 <sup>-</sup> | $\leftarrow$ | 8    | 0      | 8      | 0 <sup>-</sup> | 7162.1121        | -0.0165                             |
| <b><sup>c</sup>R-branch</b>          |       |       |                |              |      |        |        |                |                  |                                     |
| <b>0<sup>+</sup> ← 0<sup>+</sup></b> |       |       |                |              |      |        |        |                |                  |                                     |
| 3                                    | 1     | 2     | 0 <sup>+</sup> | $\leftarrow$ | 2    | 0      | 2      | 0 <sup>+</sup> | 3194.8346        | 0.0229                              |
| 7                                    | 1     | 7     | 0 <sup>+</sup> | $\leftarrow$ | 6    | 2      | 5      | 0 <sup>+</sup> | 3256.7617        | -0.0238                             |
| 6                                    | 1     | 5     | 0 <sup>+</sup> | $\leftarrow$ | 5    | 2      | 3      | 0 <sup>+</sup> | 3431.0757        | -0.0096                             |
| 2                                    | 2     | 0     | 0 <sup>+</sup> | $\leftarrow$ | 1    | 1      | 0      | 0 <sup>+</sup> | 3441.4925        | -0.0153                             |
| 2                                    | 2     | 1     | 0 <sup>+</sup> | $\leftarrow$ | 1    | 1      | 1      | 0 <sup>+</sup> | 3482.7497        | -0.0029                             |
| 6                                    | 0     | 6     | 0 <sup>+</sup> | $\leftarrow$ | 5    | 1      | 4      | 0 <sup>+</sup> | 3840.1839        | 0.0114                              |
| 4                                    | 1     | 3     | 0 <sup>+</sup> | $\leftarrow$ | 3    | 0      | 3      | 0 <sup>+</sup> | 4104.2460        | 0.0111                              |
| 3                                    | 2     | 1     | 0 <sup>+</sup> | $\leftarrow$ | 2    | 1      | 1      | 0 <sup>+</sup> | 4225.7046        | -0.0023                             |
| 7                                    | 4     | 4     | 0 <sup>+</sup> | $\leftarrow$ | 7    | 3      | 4      | 0 <sup>+</sup> | 4228.5135        | -0.0099                             |
| 7                                    | 4     | 3     | 0 <sup>+</sup> | $\leftarrow$ | 7    | 3      | 5      | 0 <sup>+</sup> | 4244.5978        | -0.0118                             |
| 3                                    | 2     | 2     | 0 <sup>+</sup> | $\leftarrow$ | 2    | 1      | 2      | 0 <sup>+</sup> | 4344.7864        | 0.0053                              |
| 4                                    | 2     | 2     | 0 <sup>+</sup> | $\leftarrow$ | 3    | 1      | 2      | 0 <sup>+</sup> | 5001.3081        | -0.0027                             |
| 5                                    | 1     | 4     | 0 <sup>+</sup> | $\leftarrow$ | 4    | 0      | 4      | 0 <sup>+</sup> | 5042.4470        | -0.0141                             |
| 4                                    | 2     | 3     | 0 <sup>+</sup> | $\leftarrow$ | 3    | 1      | 3      | 0 <sup>+</sup> | 5227.9861        | 0.0081                              |
| 3                                    | 3     | 0     | 0 <sup>+</sup> | $\leftarrow$ | 2    | 2      | 0      | 0 <sup>+</sup> | 5494.5389        | -0.0166                             |
| 3                                    | 3     | 1     | 0 <sup>+</sup> | $\leftarrow$ | 2    | 2      | 1      | 0 <sup>+</sup> | 5496.7793        | -0.0184                             |
| 5                                    | 2     | 3     | 0 <sup>+</sup> | $\leftarrow$ | 4    | 1      | 3      | 0 <sup>+</sup> | 5776.7585        | -0.0099                             |
| 9                                    | 1     | 8     | 0 <sup>+</sup> | $\leftarrow$ | 8    | 2      | 6      | 0 <sup>+</sup> | 5943.8299        | 0.0129                              |
| 6                                    | 1     | 5     | 0 <sup>+</sup> | $\leftarrow$ | 5    | 0      | 5      | 0 <sup>+</sup> | 6013.8335        | -0.0065                             |
| 5                                    | 2     | 4     | 0 <sup>+</sup> | $\leftarrow$ | 4    | 1      | 4      | 0 <sup>+</sup> | 6132.2991        | 0.0025                              |



| $J$                  | $K_a$ | $K_c$ | $v$            | $\leftarrow$ | $J'$ | $K_a'$ | $K_c'$ | $v'$           | $V_{\text{obs}}$ | $V_{\text{obs}} - V_{\text{calc}}$ |
|----------------------|-------|-------|----------------|--------------|------|--------|--------|----------------|------------------|------------------------------------|
| 4                    | 3     | 1     | 0 <sup>+</sup> | $\leftarrow$ | 3    | 2      | 1      | 0 <sup>+</sup> | 6308.5947        | -0.0025                            |
| 4                    | 3     | 2     | 0 <sup>+</sup> | $\leftarrow$ | 3    | 2      | 2      | 0 <sup>+</sup> | 6319.5927        | -0.0039                            |
| 6                    | 2     | 4     | 0 <sup>+</sup> | $\leftarrow$ | 5    | 1      | 4      | 0 <sup>+</sup> | 6561.3217        | 0.0032                             |
| 7                    | 1     | 6     | 0 <sup>+</sup> | $\leftarrow$ | 6    | 0      | 6      | 0 <sup>+</sup> | 7022.0208        | 0.0135                             |
| 6                    | 2     | 5     | 0 <sup>+</sup> | $\leftarrow$ | 5    | 1      | 5      | 0 <sup>+</sup> | 7057.6834        | -0.0104                            |
| 5                    | 3     | 2     | 0 <sup>+</sup> | $\leftarrow$ | 4    | 2      | 2      | 0 <sup>+</sup> | 7114.6498        | 0.0065                             |
| 5                    | 3     | 3     | 0 <sup>+</sup> | $\leftarrow$ | 4    | 2      | 3      | 0 <sup>+</sup> | 7146.7527        | -0.0013                            |
| 7                    | 2     | 5     | 0 <sup>+</sup> | $\leftarrow$ | 6    | 1      | 5      | 0 <sup>+</sup> | 7363.8115        | 0.0169                             |
| 6                    | 3     | 3     | 0 <sup>+</sup> | $\leftarrow$ | 5    | 2      | 3      | 0 <sup>+</sup> | 7908.4134        | 0.0095                             |
| 6                    | 3     | 4     | 0 <sup>+</sup> | $\leftarrow$ | 5    | 2      | 4      | 0 <sup>+</sup> | 7980.4922        | -0.0037                            |
| $1^+ \leftarrow 1^+$ |       |       |                |              |      |        |        |                |                  |                                    |
| 2                    | 1     | 1     | 1 <sup>+</sup> | $\leftarrow$ | 1    | 0      | 1      | 1 <sup>+</sup> | 2308.2053        | 0.0105                             |
| 3                    | 1     | 2     | 1 <sup>+</sup> | $\leftarrow$ | 2    | 0      | 2      | 1 <sup>+</sup> | 3191.2530        | 0.0049                             |
| 7                    | 1     | 7     | 1 <sup>+</sup> | $\leftarrow$ | 6    | 2      | 5      | 1 <sup>+</sup> | 3260.4520        | -0.0024                            |
| 6                    | 1     | 5     | 1 <sup>+</sup> | $\leftarrow$ | 5    | 2      | 3      | 1 <sup>+</sup> | 3426.9997        | -0.0145                            |
| 2                    | 2     | 0     | 1 <sup>+</sup> | $\leftarrow$ | 1    | 1      | 0      | 1 <sup>+</sup> | 3441.4575        | 0.0212                             |
| 2                    | 2     | 1     | 1 <sup>+</sup> | $\leftarrow$ | 1    | 1      | 1      | 1 <sup>+</sup> | 3481.9551        | 0.0014                             |
| 4                    | 1     | 3     | 1 <sup>+</sup> | $\leftarrow$ | 3    | 0      | 3      | 1 <sup>+</sup> | 4099.4943        | 0.0060                             |
| 3                    | 2     | 1     | 1 <sup>+</sup> | $\leftarrow$ | 2    | 1      | 1      | 1 <sup>+</sup> | 4225.5023        | 0.0037                             |
| 7                    | 1     | 6     | 1 <sup>+</sup> | $\leftarrow$ | 6    | 2      | 4      | 1 <sup>+</sup> | 4298.2203        | -0.0013                            |
| 3                    | 2     | 2     | 1 <sup>+</sup> | $\leftarrow$ | 2    | 1      | 2      | 1 <sup>+</sup> | 4342.5931        | -0.0095                            |
| 4                    | 2     | 2     | 1 <sup>+</sup> | $\leftarrow$ | 3    | 1      | 2      | 1 <sup>+</sup> | 5001.2294        | 0.0092                             |
| 5                    | 1     | 4     | 1 <sup>+</sup> | $\leftarrow$ | 4    | 0      | 4      | 1 <sup>+</sup> | 5036.8704        | 0.0044                             |
| 4                    | 2     | 3     | 1 <sup>+</sup> | $\leftarrow$ | 3    | 1      | 3      | 1 <sup>+</sup> | 5224.4363        | -0.0173                            |
| 3                    | 3     | 0     | 1 <sup>+</sup> | $\leftarrow$ | 2    | 2      | 0      | 1 <sup>+</sup> | 5494.1906        | 0.0110                             |
| 3                    | 3     | 1     | 1 <sup>+</sup> | $\leftarrow$ | 2    | 2      | 1      | 1 <sup>+</sup> | 5496.3903        | 0.0107                             |
| 5                    | 2     | 3     | 1 <sup>+</sup> | $\leftarrow$ | 4    | 1      | 3      | 1 <sup>+</sup> | 5776.9627        | 0.0040                             |
| 6                    | 1     | 5     | 1 <sup>+</sup> | $\leftarrow$ | 5    | 0      | 5      | 1 <sup>+</sup> | 6007.8442        | 0.0001                             |
| 4                    | 3     | 1     | 1 <sup>+</sup> | $\leftarrow$ | 3    | 2      | 1      | 1 <sup>+</sup> | 6307.7651        | -0.0021                            |
| 4                    | 3     | 2     | 1 <sup>+</sup> | $\leftarrow$ | 3    | 2      | 2      | 1 <sup>+</sup> | 6318.5900        | 0.0016                             |
| 6                    | 2     | 4     | 1 <sup>+</sup> | $\leftarrow$ | 5    | 1      | 4      | 1 <sup>+</sup> | 6561.9340        | 0.0017                             |
| 7                    | 1     | 6     | 1 <sup>+</sup> | $\leftarrow$ | 6    | 0      | 6      | 1 <sup>+</sup> | 7016.1289        | -0.0152                            |
| 6                    | 2     | 5     | 1 <sup>+</sup> | $\leftarrow$ | 5    | 1      | 5      | 1 <sup>+</sup> | 7052.2341        | -0.0134                            |
| 5                    | 3     | 2     | 1 <sup>+</sup> | $\leftarrow$ | 4    | 2      | 2      | 1 <sup>+</sup> | 7113.7745        | -0.0073                            |
| 5                    | 3     | 3     | 1 <sup>+</sup> | $\leftarrow$ | 4    | 2      | 3      | 1 <sup>+</sup> | 7145.4768        | -0.0015                            |
| 7                    | 2     | 5     | 1 <sup>+</sup> | $\leftarrow$ | 6    | 1      | 5      | 1 <sup>+</sup> | 7364.9918        | -0.0129                            |
| 4                    | 4     | 1     | 1 <sup>+</sup> | $\leftarrow$ | 3    | 3      | 1      | 1 <sup>+</sup> | 7529.7872        | 0.0103                             |
| 6                    | 3     | 3     | 1 <sup>+</sup> | $\leftarrow$ | 5    | 2      | 3      | 1 <sup>+</sup> | 7907.8748        | -0.0134                            |
| 6                    | 3     | 4     | 1 <sup>+</sup> | $\leftarrow$ | 5    | 2      | 4      | 1 <sup>+</sup> | 7979.3200        | 0.0033                             |
| 7                    | 2     | 6     | 1 <sup>+</sup> | $\leftarrow$ | 6    | 1      | 6      | 1 <sup>+</sup> | 7998.2346        | 0.0032                             |
| 5                    | 1     | 4     | 1 <sup>+</sup> | $\leftarrow$ | 4    | 2      | 2      | 1 <sup>+</sup> | 2538.3668        | -0.0023                            |
| $0^- \leftarrow 0^-$ |       |       |                |              |      |        |        |                |                  |                                    |
| 4                    | 0     | 4     | 0 <sup>-</sup> | $\leftarrow$ | 3    | 1      | 2      | 0 <sup>-</sup> | 2502.4752        | -0.0063                            |
| 3                    | 1     | 2     | 0 <sup>-</sup> | $\leftarrow$ | 2    | 0      | 2      | 0 <sup>-</sup> | 3194.6489        | 0.0224                             |
| 7                    | 1     | 7     | 0 <sup>-</sup> | $\leftarrow$ | 6    | 2      | 5      | 0 <sup>-</sup> | 3257.0199        | -0.0030                            |
| 6                    | 1     | 5     | 0 <sup>-</sup> | $\leftarrow$ | 5    | 2      | 3      | 0 <sup>-</sup> | 3432.7288        | -0.0064                            |
| 2                    | 2     | 0     | 0 <sup>-</sup> | $\leftarrow$ | 1    | 1      | 0      | 0 <sup>-</sup> | 3440.3979        | -0.0087                            |
| 2                    | 2     | 1     | 0 <sup>-</sup> | $\leftarrow$ | 1    | 1      | 1      | 0 <sup>-</sup> | 3481.7092        | -0.0046                            |
| 4                    | 1     | 3     | 0 <sup>-</sup> | $\leftarrow$ | 3    | 0      | 3      | 0 <sup>-</sup> | 4104.2460        | 0.0111                             |
| 3                    | 2     | 1     | 0 <sup>-</sup> | $\leftarrow$ | 2    | 1      | 1      | 0 <sup>-</sup> | 4224.6285        | -0.0056                            |
| 7                    | 1     | 6     | 0 <sup>-</sup> | $\leftarrow$ | 6    | 2      | 4      | 0 <sup>-</sup> | 4302.5453        | 0.0143                             |
| 3                    | 2     | 2     | 0 <sup>-</sup> | $\leftarrow$ | 2    | 1      | 2      | 0 <sup>-</sup> | 4343.7968        | 0.0069                             |
| 8                    | 0     | 8     | 0 <sup>-</sup> | $\leftarrow$ | 7    | 1      | 6      | 0 <sup>-</sup> | 4982.5952        | 0.0098                             |
| 4                    | 2     | 2     | 0 <sup>-</sup> | $\leftarrow$ | 3    | 1      | 2      | 0 <sup>-</sup> | 5000.2684        | -0.0024                            |
| 5                    | 1     | 4     | 0 <sup>-</sup> | $\leftarrow$ | 4    | 0      | 4      | 0 <sup>-</sup> | 5042.7516        | -0.0126                            |
| 4                    | 2     | 3     | 0 <sup>-</sup> | $\leftarrow$ | 3    | 1      | 3      | 0 <sup>-</sup> | 5227.0952        | 0.0096                             |
| 9                    | 0     | 9     | 0 <sup>-</sup> | $\leftarrow$ | 8    | 1      | 7      | 0 <sup>-</sup> | 5481.9470        | -0.0230                            |
| 3                    | 3     | 0     | 0 <sup>-</sup> | $\leftarrow$ | 2    | 2      | 0      | 0 <sup>-</sup> | 5492.7762        | -0.0133                            |
| 3                    | 3     | 1     | 0 <sup>-</sup> | $\leftarrow$ | 2    | 2      | 1      | 0 <sup>-</sup> | 5495.0268        | -0.0133                            |

| $J$                    | $K_a$ | $K_c$ | $v$            | $\leftarrow$ | $J'$ | $K_a'$ | $K_c'$ | $v'$           | $V_{\text{obs}}$ | $V_{\text{obs}}-V_{\text{calc}}$ |
|------------------------|-------|-------|----------------|--------------|------|--------|--------|----------------|------------------|----------------------------------|
| 5                      | 2     | 3     | 0 <sup>-</sup> | $\leftarrow$ | 4    | 1      | 3      | 0 <sup>-</sup> | 5775.8202        | -0.0091                          |
| 9                      | 1     | 8     | 0 <sup>-</sup> | $\leftarrow$ | 8    | 2      | 6      | 0 <sup>-</sup> | 5944.9161        | 0.0273                           |
| 6                      | 1     | 5     | 0 <sup>-</sup> | $\leftarrow$ | 5    | 0      | 5      | 0 <sup>-</sup> | 6014.5677        | -0.0121                          |
| 5                      | 2     | 4     | 0 <sup>-</sup> | $\leftarrow$ | 4    | 1      | 4      | 0 <sup>-</sup> | 6131.5722        | 0.0041                           |
| 4                      | 3     | 1     | 0 <sup>-</sup> | $\leftarrow$ | 3    | 2      | 1      | 0 <sup>-</sup> | 6306.8322        | 0.0017                           |
| 4                      | 3     | 2     | 0 <sup>-</sup> | $\leftarrow$ | 3    | 2      | 2      | 0 <sup>-</sup> | 6317.8706        | -0.0012                          |
| 6                      | 2     | 4     | 0 <sup>-</sup> | $\leftarrow$ | 5    | 1      | 4      | 0 <sup>-</sup> | 6560.5806        | -0.0005                          |
| 7                      | 1     | 6     | 0 <sup>-</sup> | $\leftarrow$ | 6    | 0      | 6      | 0 <sup>-</sup> | 7023.3230        | -0.0042                          |
| 6                      | 2     | 5     | 0 <sup>-</sup> | $\leftarrow$ | 5    | 1      | 5      | 0 <sup>-</sup> | 7057.1939        | -0.0104                          |
| 5                      | 3     | 2     | 0 <sup>-</sup> | $\leftarrow$ | 4    | 2      | 2      | 0 <sup>-</sup> | 7112.8797        | 0.0081                           |
| 5                      | 3     | 3     | 0 <sup>-</sup> | $\leftarrow$ | 4    | 2      | 3      | 0 <sup>-</sup> | 7145.1093        | -0.0009                          |
| 7                      | 2     | 5     | 0 <sup>-</sup> | $\leftarrow$ | 6    | 1      | 5      | 0 <sup>-</sup> | 7363.3910        | 0.0066                           |
| 4                      | 4     | 0     | 0 <sup>-</sup> | $\leftarrow$ | 3    | 3      | 0      | 0 <sup>-</sup> | 7527.5986        | -0.0262                          |
| 4                      | 4     | 1     | 0 <sup>-</sup> | $\leftarrow$ | 3    | 3      | 1      | 0 <sup>-</sup> | 7527.6770        | -0.0230                          |
| 6                      | 3     | 3     | 0 <sup>-</sup> | $\leftarrow$ | 5    | 2      | 3      | 0 <sup>-</sup> | 7906.6142        | 0.0096                           |
| 6                      | 3     | 4     | 0 <sup>-</sup> | $\leftarrow$ | 5    | 2      | 4      | 0 <sup>-</sup> | 7978.9912        | -0.0026                          |
| $1^- \leftarrow 1^-$   |       |       |                |              |      |        |        |                |                  |                                  |
| 2                      | 1     | 1     | 1 <sup>-</sup> | $\leftarrow$ | 1    | 0      | 1      | 1 <sup>-</sup> | 2308.2053        | 0.0105                           |
| 4                      | 0     | 4     | 1 <sup>-</sup> | $\leftarrow$ | 3    | 1      | 2      | 1 <sup>-</sup> | 2502.8398        | 0.0039                           |
| 3                      | 1     | 2     | 1 <sup>-</sup> | $\leftarrow$ | 2    | 0      | 2      | 1 <sup>-</sup> | 3191.5951        | 0.0010                           |
| 5                      | 0     | 5     | 1 <sup>-</sup> | $\leftarrow$ | 4    | 1      | 3      | 1 <sup>-</sup> | 3195.7944        | 0.0101                           |
| 7                      | 1     | 7     | 1 <sup>-</sup> | $\leftarrow$ | 6    | 2      | 5      | 1 <sup>-</sup> | 3260.1559        | 0.0011                           |
| 6                      | 1     | 5     | 1 <sup>-</sup> | $\leftarrow$ | 5    | 2      | 3      | 1 <sup>-</sup> | 3429.2528        | 0.0093                           |
| 2                      | 2     | 0     | 1 <sup>-</sup> | $\leftarrow$ | 1    | 1      | 0      | 1 <sup>-</sup> | 3440.3979        | -0.0087                          |
| 2                      | 2     | 1     | 1 <sup>-</sup> | $\leftarrow$ | 1    | 1      | 1      | 1 <sup>-</sup> | 3481.0363        | 0.0052                           |
| 6                      | 0     | 6     | 1 <sup>-</sup> | $\leftarrow$ | 5    | 1      | 4      | 1 <sup>-</sup> | 3843.0661        | 0.0062                           |
| 4                      | 1     | 3     | 1 <sup>-</sup> | $\leftarrow$ | 3    | 0      | 3      | 1 <sup>-</sup> | 4100.1952        | 0.0060                           |
| 3                      | 2     | 1     | 1 <sup>-</sup> | $\leftarrow$ | 2    | 1      | 1      | 1 <sup>-</sup> | 4224.4591        | 0.0090                           |
| 7                      | 1     | 6     | 1 <sup>-</sup> | $\leftarrow$ | 6    | 2      | 4      | 1 <sup>-</sup> | 4300.2447        | -0.0094                          |
| 3                      | 2     | 2     | 1 <sup>-</sup> | $\leftarrow$ | 2    | 1      | 2      | 1 <sup>-</sup> | 4341.9285        | -0.0072                          |
| 8                      | 0     | 8     | 1 <sup>-</sup> | $\leftarrow$ | 7    | 1      | 6      | 1 <sup>-</sup> | 4987.3776        | -0.0098                          |
| 4                      | 2     | 2     | 1 <sup>-</sup> | $\leftarrow$ | 3    | 1      | 2      | 1 <sup>-</sup> | 5000.1896        | 0.0077                           |
| 5                      | 1     | 4     | 1 <sup>-</sup> | $\leftarrow$ | 4    | 0      | 4      | 1 <sup>-</sup> | 5037.9848        | 0.0071                           |
| 4                      | 2     | 3     | 1 <sup>-</sup> | $\leftarrow$ | 3    | 1      | 3      | 1 <sup>-</sup> | 5224.0718        | -0.0125                          |
| 9                      | 0     | 9     | 1 <sup>-</sup> | $\leftarrow$ | 8    | 1      | 7      | 1 <sup>-</sup> | 5486.4785        | 0.0082                           |
| 3                      | 3     | 0     | 1 <sup>-</sup> | $\leftarrow$ | 2    | 2      | 0      | 1 <sup>-</sup> | 5492.4792        | 0.0130                           |
| 3                      | 3     | 1     | 1 <sup>-</sup> | $\leftarrow$ | 2    | 2      | 1      | 1 <sup>-</sup> | 5494.6938        | 0.0134                           |
| 5                      | 2     | 3     | 1 <sup>-</sup> | $\leftarrow$ | 4    | 1      | 3      | 1 <sup>-</sup> | 5775.9756        | 0.0041                           |
| 9                      | 1     | 8     | 1 <sup>-</sup> | $\leftarrow$ | 8    | 2      | 6      | 1 <sup>-</sup> | 5944.3767        | -0.0012                          |
| 6                      | 1     | 5     | 1 <sup>-</sup> | $\leftarrow$ | 5    | 0      | 5      | 1 <sup>-</sup> | 6009.4360        | 0.0053                           |
| 5                      | 2     | 4     | 1 <sup>-</sup> | $\leftarrow$ | 4    | 1      | 4      | 1 <sup>-</sup> | 6127.5887        | -0.0043                          |
| 4                      | 3     | 1     | 1 <sup>-</sup> | $\leftarrow$ | 3    | 2      | 1      | 1 <sup>-</sup> | 6306.1253        | 0.0032                           |
| 4                      | 3     | 2     | 1 <sup>-</sup> | $\leftarrow$ | 3    | 2      | 2      | 1 <sup>-</sup> | 6317.0144        | 0.0047                           |
| 6                      | 2     | 4     | 1 <sup>-</sup> | $\leftarrow$ | 5    | 1      | 4      | 1 <sup>-</sup> | 6561.0790        | 0.0045                           |
| 7                      | 1     | 6     | 1 <sup>-</sup> | $\leftarrow$ | 6    | 0      | 6      | 1 <sup>-</sup> | 7018.2593        | -0.0094                          |
| 6                      | 2     | 5     | 1 <sup>-</sup> | $\leftarrow$ | 5    | 1      | 5      | 1 <sup>-</sup> | 7052.5419        | -0.0068                          |
| 5                      | 3     | 2     | 1 <sup>-</sup> | $\leftarrow$ | 4    | 2      | 2      | 1 <sup>-</sup> | 7112.1313        | -0.0051                          |
| 5                      | 3     | 3     | 1 <sup>-</sup> | $\leftarrow$ | 4    | 2      | 3      | 1 <sup>-</sup> | 7144.0183        | 0.0025                           |
| 7                      | 2     | 5     | 1 <sup>-</sup> | $\leftarrow$ | 6    | 1      | 5      | 1 <sup>-</sup> | 7364.3661        | -0.0117                          |
| 4                      | 4     | 0     | 1 <sup>-</sup> | $\leftarrow$ | 3    | 3      | 0      | 1 <sup>-</sup> | 7527.2999        | 0.0108                           |
| 4                      | 4     | 1     | 1 <sup>-</sup> | $\leftarrow$ | 3    | 3      | 1      | 1 <sup>-</sup> | 7527.3778        | 0.0138                           |
| 6                      | 3     | 3     | 1 <sup>-</sup> | $\leftarrow$ | 5    | 2      | 3      | 1 <sup>-</sup> | 7906.1564        | -0.0080                          |
| 6                      | 3     | 4     | 1 <sup>-</sup> | $\leftarrow$ | 5    | 2      | 4      | 1 <sup>-</sup> | 7977.9784        | 0.0047                           |
| 7                      | 2     | 6     | 1 <sup>-</sup> | $\leftarrow$ | 6    | 1      | 6      | 1 <sup>-</sup> | 7998.8943        | 0.0054                           |
| 5                      | 1     | 4     | 1 <sup>-</sup> | $\leftarrow$ | 4    | 2      | 2      | 1 <sup>-</sup> | 2540.6363        | 0.0046                           |
| ${}^e Q\text{-branch}$ |       |       |                |              |      |        |        |                |                  |                                  |
| $0^+ \leftarrow 0^+$   |       |       |                |              |      |        |        |                |                  |                                  |
| 7                      | 3     | 5     | 0 <sup>+</sup> | $\leftarrow$ | 7    | 2      | 5      | 0 <sup>+</sup> | 2849.5416        | -0.0032                          |
| 5                      | 3     | 3     | 0 <sup>+</sup> | $\leftarrow$ | 5    | 2      | 3      | 0 <sup>+</sup> | 2981.4213        | 0.0146                           |

| $J$                  | $K_a$ | $K_c$ | $v$            | $\leftarrow$ | $J'$ | $K_a'$ | $K_c'$ | $v'$           | $V_{\text{obs}}$ | $V_{\text{obs}}-V_{\text{calc}}$ |
|----------------------|-------|-------|----------------|--------------|------|--------|--------|----------------|------------------|----------------------------------|
| 6                    | 3     | 3     | 0 <sup>+</sup> | $\leftarrow$ | 6    | 2      | 5      | 0 <sup>+</sup> | 3087.2331        | 0.0133                           |
| 6                    | 4     | 2     | 0 <sup>+</sup> | $\leftarrow$ | 6    | 3      | 4      | 0 <sup>+</sup> | 4247.4198        | -0.0007                          |
| 5                    | 4     | 2     | 0 <sup>+</sup> | $\leftarrow$ | 5    | 3      | 2      | 0 <sup>+</sup> | 4247.8002        | -0.0136                          |
| $1^+ \leftarrow 1^+$ |       |       |                |              |      |        |        |                |                  |                                  |
| 7                    | 3     | 5     | 1 <sup>+</sup> | $\leftarrow$ | 7    | 2      | 5      | 1 <sup>+</sup> | 2850.4100        | 0.0013                           |
| 5                    | 3     | 3     | 1 <sup>+</sup> | $\leftarrow$ | 5    | 2      | 3      | 1 <sup>+</sup> | 2983.0785        | -0.0003                          |
| 4                    | 3     | 1     | 1 <sup>+</sup> | $\leftarrow$ | 4    | 2      | 3      | 1 <sup>+</sup> | 3049.4227        | 0.0005                           |
| 5                    | 3     | 2     | 1 <sup>+</sup> | $\leftarrow$ | 5    | 2      | 4      | 1 <sup>+</sup> | 3063.0127        | -0.0072                          |
| 6                    | 3     | 3     | 1 <sup>+</sup> | $\leftarrow$ | 6    | 2      | 5      | 1 <sup>+</sup> | 3087.9772        | -0.0032                          |
| 8                    | 4     | 5     | 1 <sup>+</sup> | $\leftarrow$ | 8    | 3      | 5      | 1 <sup>+</sup> | 4207.4517        | 0.0002                           |
| 7                    | 4     | 4     | 1 <sup>+</sup> | $\leftarrow$ | 7    | 3      | 4      | 1 <sup>+</sup> | 4229.2066        | -0.0089                          |
| 7                    | 4     | 3     | 1 <sup>+</sup> | $\leftarrow$ | 7    | 3      | 5      | 1 <sup>+</sup> | 4245.3827        | -0.0025                          |
| 5                    | 4     | 2     | 1 <sup>+</sup> | $\leftarrow$ | 5    | 3      | 2      | 1 <sup>+</sup> | 4249.6537        | 0.0125                           |
| 5                    | 4     | 1     | 1 <sup>+</sup> | $\leftarrow$ | 5    | 3      | 3      | 1 <sup>+</sup> | 4251.8050        | 0.0102                           |
| 6                    | 5     | 2     | 1 <sup>+</sup> | $\leftarrow$ | 6    | 4      | 2      | 1 <sup>+</sup> | 5467.2467        | 0.0119                           |
| 6                    | 5     | 2     | 1 <sup>+</sup> | $\leftarrow$ | 6    | 4      | 3      | 1 <sup>+</sup> | 5467.3316        | 0.0020                           |
| 7                    | 6     | 2     | 1 <sup>+</sup> | $\leftarrow$ | 7    | 5      | 2      | 1 <sup>+</sup> | 6683.2811        | -0.0096                          |
| 7                    | 6     | 1     | 1 <sup>+</sup> | $\leftarrow$ | 7    | 5      | 3      | 1 <sup>+</sup> | 6683.2811        | -0.0096                          |
| $0^- \leftarrow 0^-$ |       |       |                |              |      |        |        |                |                  |                                  |
| 7                    | 3     | 5     | 0 <sup>-</sup> | $\leftarrow$ | 7    | 2      | 5      | 0 <sup>-</sup> | 2846.7984        | -0.0042                          |
| 6                    | 3     | 4     | 0 <sup>-</sup> | $\leftarrow$ | 6    | 2      | 4      | 0 <sup>-</sup> | 2926.0440        | 0.0192                           |
| 5                    | 3     | 3     | 0 <sup>-</sup> | $\leftarrow$ | 5    | 2      | 3      | 0 <sup>-</sup> | 2979.3444        | 0.0124                           |
| 4                    | 3     | 1     | 0 <sup>-</sup> | $\leftarrow$ | 4    | 2      | 3      | 0 <sup>-</sup> | 3046.2530        | -0.0180                          |
| 5                    | 3     | 2     | 0 <sup>-</sup> | $\leftarrow$ | 5    | 2      | 4      | 0 <sup>-</sup> | 3060.2834        | -0.0011                          |
| 6                    | 3     | 3     | 0 <sup>-</sup> | $\leftarrow$ | 6    | 2      | 5      | 0 <sup>-</sup> | 3085.6457        | 0.0138                           |
| 7                    | 3     | 4     | 0 <sup>-</sup> | $\leftarrow$ | 7    | 2      | 6      | 0 <sup>-</sup> | 3127.6314        | 0.0169                           |
| 8                    | 4     | 5     | 0 <sup>-</sup> | $\leftarrow$ | 8    | 3      | 5      | 0 <sup>-</sup> | 4204.3345        | 0.0065                           |
| 6                    | 4     | 3     | 0 <sup>-</sup> | $\leftarrow$ | 6    | 3      | 3      | 0 <sup>-</sup> | 4238.3203        | 0.0053                           |
| 6                    | 4     | 2     | 0 <sup>-</sup> | $\leftarrow$ | 6    | 3      | 4      | 0 <sup>-</sup> | 4244.8317        | 0.0087                           |
| 5                    | 4     | 2     | 0 <sup>-</sup> | $\leftarrow$ | 5    | 3      | 2      | 0 <sup>-</sup> | 4245.2189        | -0.0160                          |
| 5                    | 4     | 1     | 0 <sup>-</sup> | $\leftarrow$ | 5    | 3      | 3      | 0 <sup>-</sup> | 4247.4198        | -0.0007                          |
| 9                    | 5     | 5     | 0 <sup>-</sup> | $\leftarrow$ | 9    | 4      | 5      | 0 <sup>-</sup> | 5445.6561        | 0.0110                           |
| 9                    | 5     | 4     | 0 <sup>-</sup> | $\leftarrow$ | 9    | 4      | 6      | 0 <sup>-</sup> | 5448.4099        | -0.0006                          |
| 8                    | 5     | 4     | 0 <sup>-</sup> | $\leftarrow$ | 8    | 4      | 4      | 0 <sup>-</sup> | 5453.5472        | 0.0113                           |
| 8                    | 5     | 3     | 0 <sup>-</sup> | $\leftarrow$ | 8    | 4      | 5      | 0 <sup>-</sup> | 5454.6177        | 0.0134                           |
| 7                    | 5     | 3     | 0 <sup>-</sup> | $\leftarrow$ | 7    | 4      | 3      | 0 <sup>-</sup> | 5458.7109        | 0.0166                           |
| 7                    | 5     | 2     | 0 <sup>-</sup> | $\leftarrow$ | 7    | 4      | 4      | 0 <sup>-</sup> | 5459.0642        | 0.0142                           |
| 6                    | 5     | 1     | 0 <sup>-</sup> | $\leftarrow$ | 6    | 4      | 2      | 0 <sup>-</sup> | 5461.9059        | -0.0124                          |
| 6                    | 5     | 2     | 0 <sup>-</sup> | $\leftarrow$ | 6    | 4      | 3      | 0 <sup>-</sup> | 5462.0042        | -0.0098                          |
| 8                    | 6     | 3     | 0 <sup>-</sup> | $\leftarrow$ | 8    | 5      | 3      | 0 <sup>-</sup> | 6674.8118        | 0.0060                           |
| 8                    | 6     | 2     | 0 <sup>-</sup> | $\leftarrow$ | 8    | 5      | 4      | 0 <sup>-</sup> | 6674.8118        | 0.0060                           |
| 7                    | 6     | 2     | 0 <sup>-</sup> | $\leftarrow$ | 7    | 5      | 2      | 0 <sup>-</sup> | 6677.0970        | -0.0263                          |
| $1^- \leftarrow 1^-$ |       |       |                |              |      |        |        |                |                  |                                  |
| 7                    | 3     | 5     | 1 <sup>-</sup> | $\leftarrow$ | 7    | 2      | 5      | 1 <sup>-</sup> | 2847.5851        | 0.0049                           |
| 6                    | 3     | 4     | 1 <sup>-</sup> | $\leftarrow$ | 6    | 2      | 4      | 1 <sup>-</sup> | 2927.2432        | -0.0029                          |
| 5                    | 3     | 3     | 1 <sup>-</sup> | $\leftarrow$ | 5    | 2      | 3      | 1 <sup>-</sup> | 2980.7681        | -0.0015                          |
| 4                    | 3     | 1     | 1 <sup>-</sup> | $\leftarrow$ | 4    | 2      | 3      | 1 <sup>-</sup> | 3047.4673        | 0.0100                           |
| 5                    | 3     | 2     | 1 <sup>-</sup> | $\leftarrow$ | 5    | 2      | 4      | 1 <sup>-</sup> | 3061.1517        | -0.0059                          |
| 6                    | 3     | 3     | 1 <sup>-</sup> | $\leftarrow$ | 6    | 2      | 5      | 1 <sup>-</sup> | 3086.2760        | 0.0015                           |
| 7                    | 3     | 4     | 1 <sup>-</sup> | $\leftarrow$ | 7    | 2      | 6      | 1 <sup>-</sup> | 3128.2146        | 0.0074                           |
| 8                    | 4     | 5     | 1 <sup>-</sup> | $\leftarrow$ | 8    | 3      | 5      | 1 <sup>-</sup> | 4204.4712        | -0.0044                          |
| 7                    | 4     | 4     | 1 <sup>-</sup> | $\leftarrow$ | 7    | 3      | 4      | 1 <sup>-</sup> | 4226.3363        | -0.0026                          |
| 6                    | 4     | 3     | 1 <sup>-</sup> | $\leftarrow$ | 6    | 3      | 3      | 1 <sup>-</sup> | 4239.3988        | -0.0033                          |
| 6                    | 4     | 2     | 1 <sup>-</sup> | $\leftarrow$ | 6    | 3      | 4      | 1 <sup>-</sup> | 4245.9163        | -0.0091                          |
| 5                    | 4     | 2     | 1 <sup>-</sup> | $\leftarrow$ | 5    | 3      | 2      | 1 <sup>-</sup> | 4246.8092        | 0.0116                           |
| 5                    | 4     | 1     | 1 <sup>-</sup> | $\leftarrow$ | 5    | 3      | 3      | 1 <sup>-</sup> | 4248.9813        | 0.0129                           |
| 9                    | 5     | 5     | 1 <sup>-</sup> | $\leftarrow$ | 9    | 4      | 5      | 1 <sup>-</sup> | 5445.6561        | 0.0110                           |
| 9                    | 5     | 4     | 1 <sup>-</sup> | $\leftarrow$ | 9    | 4      | 6      | 1 <sup>-</sup> | 5448.4099        | -0.0006                          |
| 8                    | 5     | 4     | 1 <sup>-</sup> | $\leftarrow$ | 8    | 4      | 4      | 1 <sup>-</sup> | 5453.9638        | -0.0161                          |

| $J$ | $K_a$ | $K_c$ | $v$            | $\leftarrow$ | $J'$ | $K_a'$ | $K_c'$ | $v'$           | $V_{\text{obs}}$ | $V_{\text{obs}}-V_{\text{calc}}$ |
|-----|-------|-------|----------------|--------------|------|--------|--------|----------------|------------------|----------------------------------|
| 8   | 5     | 3     | 1 <sup>-</sup> | $\leftarrow$ | 8    | 4      | 5      | 1 <sup>-</sup> | 5455.0323        | -0.0089                          |
| 7   | 5     | 3     | 1 <sup>-</sup> | $\leftarrow$ | 7    | 4      | 3      | 1 <sup>-</sup> | 5459.7187        | -0.0110                          |
| 7   | 5     | 2     | 1 <sup>-</sup> | $\leftarrow$ | 7    | 4      | 4      | 1 <sup>-</sup> | 5460.0725        | -0.0112                          |
| 6   | 5     | 1     | 1 <sup>-</sup> | $\leftarrow$ | 6    | 4      | 3      | 1 <sup>-</sup> | 5463.7290        | 0.0064                           |
| 7   | 6     | 1     | 1 <sup>-</sup> | $\leftarrow$ | 7    | 5      | 3      | 1 <sup>-</sup> | 6678.9211        | 0.0086                           |

**Table S11** Measured frequencies ( $v_{\text{obs}}$ ) in MHz and residuals ( $v_{\text{obs}} - v_{\text{calc}}$ ) in MHz of the rotational transitions of the parent species of Phe-D<sub>2</sub>O.

| <sup>a</sup> R-branch                |       |       |                |              |      |        |        |                |                  |                                  |
|--------------------------------------|-------|-------|----------------|--------------|------|--------|--------|----------------|------------------|----------------------------------|
| $J$                                  | $K_a$ | $K_c$ | $v$            | $\leftarrow$ | $J'$ | $K_a'$ | $K_c'$ | $v'$           | $V_{\text{obs}}$ | $V_{\text{obs}}-V_{\text{calc}}$ |
| <b>0<sup>+</sup> ← 1<sup>+</sup></b> |       |       |                |              |      |        |        |                |                  |                                  |
| 3                                    | 1     | 3     | 0 <sup>+</sup> | $\leftarrow$ | 2    | 1      | 2      | 1 <sup>+</sup> | 2389.0976        | -0.0147                          |
| 3                                    | 0     | 3     | 0 <sup>+</sup> | $\leftarrow$ | 2    | 0      | 2      | 1 <sup>+</sup> | 2449.4295        | -0.0034                          |
| 3                                    | 1     | 2     | 0 <sup>+</sup> | $\leftarrow$ | 2    | 1      | 1      | 1 <sup>+</sup> | 2526.1023        | -0.0107                          |
| 4                                    | 1     | 4     | 0 <sup>+</sup> | $\leftarrow$ | 3    | 1      | 3      | 1 <sup>+</sup> | 3184.9042        | -0.0069                          |
| 4                                    | 0     | 4     | 0 <sup>+</sup> | $\leftarrow$ | 3    | 0      | 3      | 1 <sup>+</sup> | 3256.8263        | 0.0049                           |
| 4                                    | 2     | 3     | 0 <sup>+</sup> | $\leftarrow$ | 3    | 2      | 2      | 1 <sup>+</sup> | 3278.9222        | 0.0148                           |
| 4                                    | 1     | 3     | 0 <sup>+</sup> | $\leftarrow$ | 3    | 1      | 2      | 1 <sup>+</sup> | 3367.7024        | 0.0216                           |
| 5                                    | 1     | 5     | 0 <sup>+</sup> | $\leftarrow$ | 4    | 1      | 4      | 1 <sup>+</sup> | 3978.6654        | 0.0035                           |
| 5                                    | 0     | 5     | 0 <sup>+</sup> | $\leftarrow$ | 4    | 0      | 4      | 1 <sup>+</sup> | 4055.4511        | 0.0048                           |
| 5                                    | 2     | 4     | 0 <sup>+</sup> | $\leftarrow$ | 4    | 2      | 3      | 1 <sup>+</sup> | 4097.6637        | 0.0078                           |
| 5                                    | 2     | 3     | 0 <sup>+</sup> | $\leftarrow$ | 4    | 2      | 2      | 1 <sup>+</sup> | 4145.3611        | 0.0110                           |
| 5                                    | 1     | 4     | 0 <sup>+</sup> | $\leftarrow$ | 4    | 1      | 3      | 1 <sup>+</sup> | 4206.2077        | 0.0074                           |
| 6                                    | 1     | 6     | 0 <sup>+</sup> | $\leftarrow$ | 5    | 1      | 5      | 1 <sup>+</sup> | 4770.0486        | -0.0050                          |
| 6                                    | 0     | 6     | 0 <sup>+</sup> | $\leftarrow$ | 5    | 0      | 5      | 1 <sup>+</sup> | 4844.8315        | 0.0001                           |
| 6                                    | 2     | 5     | 0 <sup>+</sup> | $\leftarrow$ | 5    | 2      | 4      | 1 <sup>+</sup> | 4914.2364        | 0.0063                           |
| 6                                    | 3     | 4     | 0 <sup>+</sup> | $\leftarrow$ | 5    | 3      | 3      | 1 <sup>+</sup> | 4936.0373        | 0.0047                           |
| 6                                    | 3     | 3     | 0 <sup>+</sup> | $\leftarrow$ | 5    | 3      | 2      | 1 <sup>+</sup> | 4940.7142        | 0.0007                           |
| 6                                    | 2     | 4     | 0 <sup>+</sup> | $\leftarrow$ | 5    | 2      | 3      | 1 <sup>+</sup> | 4993.9609        | -0.0136                          |
| 6                                    | 1     | 5     | 0 <sup>+</sup> | $\leftarrow$ | 5    | 1      | 4      | 1 <sup>+</sup> | 5040.3671        | -0.0191                          |
| 7                                    | 1     | 7     | 0 <sup>+</sup> | $\leftarrow$ | 6    | 1      | 6      | 1 <sup>+</sup> | 5558.9546        | 0.0108                           |
| 7                                    | 0     | 7     | 0 <sup>+</sup> | $\leftarrow$ | 6    | 0      | 6      | 1 <sup>+</sup> | 5626.0638        | -0.0043                          |
| 7                                    | 2     | 6     | 0 <sup>+</sup> | $\leftarrow$ | 6    | 2      | 5      | 1 <sup>+</sup> | 5728.0723        | -0.0158                          |
| 7                                    | 3     | 5     | 0 <sup>+</sup> | $\leftarrow$ | 6    | 3      | 4      | 1 <sup>+</sup> | 5762.2654        | -0.0087                          |
| 7                                    | 3     | 4     | 0 <sup>+</sup> | $\leftarrow$ | 6    | 3      | 3      | 1 <sup>+</sup> | 5772.6644        | 0.0113                           |
| 7                                    | 2     | 5     | 0 <sup>+</sup> | $\leftarrow$ | 6    | 2      | 4      | 1 <sup>+</sup> | 5847.4185        | -0.0115                          |
| 7                                    | 1     | 6     | 0 <sup>+</sup> | $\leftarrow$ | 6    | 1      | 5      | 1 <sup>+</sup> | 5868.7806        | -0.0099                          |
| 8                                    | 1     | 8     | 0 <sup>+</sup> | $\leftarrow$ | 7    | 1      | 7      | 1 <sup>+</sup> | 6345.3541        | -0.0069                          |
| 8                                    | 0     | 8     | 0 <sup>+</sup> | $\leftarrow$ | 7    | 0      | 7      | 1 <sup>+</sup> | 6401.4650        | 0.0057                           |
| 8                                    | 3     | 5     | 0 <sup>+</sup> | $\leftarrow$ | 7    | 3      | 4      | 1 <sup>+</sup> | 6608.4647        | 0.0016                           |
| 8                                    | 1     | 7     | 0 <sup>+</sup> | $\leftarrow$ | 7    | 1      | 6      | 1 <sup>+</sup> | 6689.9491        | -0.0005                          |
| 8                                    | 2     | 6     | 0 <sup>+</sup> | $\leftarrow$ | 7    | 2      | 5      | 1 <sup>+</sup> | 6702.7417        | 0.0001                           |
| 9                                    | 1     | 9     | 0 <sup>+</sup> | $\leftarrow$ | 8    | 1      | 8      | 1 <sup>+</sup> | 7129.4777        | -0.0016                          |
| 9                                    | 0     | 9     | 0 <sup>+</sup> | $\leftarrow$ | 8    | 0      | 8      | 1 <sup>+</sup> | 7173.6269        | 0.0010                           |
| 9                                    | 2     | 8     | 0 <sup>+</sup> | $\leftarrow$ | 8    | 2      | 7      | 1 <sup>+</sup> | 7345.9998        | -0.0118                          |
| 9                                    | 1     | 8     | 0 <sup>+</sup> | $\leftarrow$ | 8    | 1      | 7      | 1 <sup>+</sup> | 7502.5364        | 0.0266                           |
| 9                                    | 2     | 7     | 0 <sup>+</sup> | $\leftarrow$ | 8    | 2      | 6      | 1 <sup>+</sup> | 7556.7787        | 0.0059                           |
| 10                                   | 1     | 10    | 0 <sup>+</sup> | $\leftarrow$ | 9    | 1      | 9      | 1 <sup>+</sup> | 7911.5728        | -0.0008                          |
| <b>1<sup>+</sup> ← 0<sup>+</sup></b> |       |       |                |              |      |        |        |                |                  |                                  |
| 3                                    | 0     | 3     | 1 <sup>+</sup> | $\leftarrow$ | 2    | 0      | 2      | 0 <sup>+</sup> | 2455.7116        | 0.0008                           |
| 4                                    | 1     | 4     | 1 <sup>+</sup> | $\leftarrow$ | 3    | 1      | 3      | 0 <sup>+</sup> | 3191.8542        | 0.0126                           |
| 4                                    | 0     | 4     | 1 <sup>+</sup> | $\leftarrow$ | 3    | 0      | 3      | 0 <sup>+</sup> | 3261.0452        | -0.0025                          |
| 4                                    | 2     | 3     | 1 <sup>+</sup> | $\leftarrow$ | 3    | 2      | 2      | 0 <sup>+</sup> | 3283.5705        | 0.0082                           |
| 4                                    | 1     | 3     | 1 <sup>+</sup> | $\leftarrow$ | 3    | 1      | 2      | 0 <sup>+</sup> | 3368.5087        | -0.0033                          |
| 5                                    | 1     | 5     | 1 <sup>+</sup> | $\leftarrow$ | 4    | 1      | 4      | 0 <sup>+</sup> | 3984.0874        | 0.0002                           |
| 5                                    | 0     | 5     | 1 <sup>+</sup> | $\leftarrow$ | 4    | 0      | 4      | 0 <sup>+</sup> | 4057.9251        | -0.0033                          |
| 5                                    | 2     | 4     | 1 <sup>+</sup> | $\leftarrow$ | 4    | 2      | 3      | 0 <sup>+</sup> | 4099.2032        | -0.0126                          |

| $J$                  | $K_a$ | $K_c$ | $v$            | $\leftarrow$ | $J'$ | $K_a'$ | $K_c'$ | $v'$           | Vobs      | Vobs-Vcalc |
|----------------------|-------|-------|----------------|--------------|------|--------|--------|----------------|-----------|------------|
| 5                    | 3     | 3     | 1 <sup>+</sup> | $\leftarrow$ | 4    | 3      | 2      | 0 <sup>+</sup> | 4113.0797 | 0.0088     |
| 5                    | 3     | 2     | 1 <sup>+</sup> | $\leftarrow$ | 4    | 3      | 1      | 0 <sup>+</sup> | 4114.8319 | -0.0058    |
| 5                    | 2     | 3     | 1 <sup>+</sup> | $\leftarrow$ | 4    | 2      | 2      | 0 <sup>+</sup> | 4146.0774 | 0.0049     |
| 5                    | 1     | 4     | 1 <sup>+</sup> | $\leftarrow$ | 4    | 1      | 3      | 0 <sup>+</sup> | 4203.5264 | -0.0075    |
| 6                    | 1     | 6     | 1 <sup>+</sup> | $\leftarrow$ | 5    | 1      | 5      | 0 <sup>+</sup> | 4774.0707 | 0.0004     |
| 6                    | 0     | 6     | 1 <sup>+</sup> | $\leftarrow$ | 5    | 0      | 5      | 0 <sup>+</sup> | 4846.1155 | 0.0040     |
| 6                    | 2     | 5     | 1 <sup>+</sup> | $\leftarrow$ | 5    | 2      | 4      | 0 <sup>+</sup> | 4912.9375 | -0.0089    |
| 6                    | 3     | 4     | 1 <sup>+</sup> | $\leftarrow$ | 5    | 3      | 3      | 0 <sup>+</sup> | 4935.8576 | -0.0081    |
| 6                    | 3     | 3     | 1 <sup>+</sup> | $\leftarrow$ | 5    | 3      | 2      | 0 <sup>+</sup> | 4940.5427 | -0.0068    |
| 6                    | 2     | 4     | 1 <sup>+</sup> | $\leftarrow$ | 5    | 2      | 3      | 0 <sup>+</sup> | 4991.5908 | 0.0133     |
| 6                    | 1     | 5     | 1 <sup>+</sup> | $\leftarrow$ | 5    | 1      | 4      | 0 <sup>+</sup> | 5034.9854 | 0.0068     |
| 7                    | 1     | 7     | 1 <sup>+</sup> | $\leftarrow$ | 6    | 1      | 6      | 0 <sup>+</sup> | 5561.7631 | 0.0045     |
| 7                    | 0     | 7     | 1 <sup>+</sup> | $\leftarrow$ | 6    | 0      | 6      | 0 <sup>+</sup> | 5626.6933 | -0.0042    |
| 7                    | 2     | 6     | 1 <sup>+</sup> | $\leftarrow$ | 6    | 2      | 5      | 0 <sup>+</sup> | 5724.5204 | -0.0072    |
| 7                    | 3     | 5     | 1 <sup>+</sup> | $\leftarrow$ | 6    | 3      | 4      | 0 <sup>+</sup> | 5759.5356 | 0.0082     |
| 7                    | 3     | 4     | 1 <sup>+</sup> | $\leftarrow$ | 6    | 3      | 3      | 0 <sup>+</sup> | 5769.9466 | -0.0072    |
| 7                    | 2     | 5     | 1 <sup>+</sup> | $\leftarrow$ | 6    | 2      | 4      | 0 <sup>+</sup> | 5842.8458 | 0.0047     |
| 7                    | 1     | 6     | 1 <sup>+</sup> | $\leftarrow$ | 6    | 1      | 5      | 0 <sup>+</sup> | 5861.8220 | 0.0226     |
| 8                    | 1     | 8     | 1 <sup>+</sup> | $\leftarrow$ | 7    | 1      | 7      | 0 <sup>+</sup> | 6347.2288 | -0.0045    |
| 8                    | 0     | 8     | 1 <sup>+</sup> | $\leftarrow$ | 7    | 0      | 7      | 0 <sup>+</sup> | 6401.8374 | 0.0009     |
| 8                    | 2     | 6     | 1 <sup>+</sup> | $\leftarrow$ | 7    | 2      | 5      | 0 <sup>+</sup> | 6697.3683 | -0.0040    |
| 9                    | 1     | 9     | 1 <sup>+</sup> | $\leftarrow$ | 8    | 1      | 8      | 0 <sup>+</sup> | 7130.6670 | -0.0013    |
| 9                    | 0     | 9     | 1 <sup>+</sup> | $\leftarrow$ | 8    | 0      | 8      | 0 <sup>+</sup> | 7173.9210 | -0.0148    |
| 9                    | 2     | 8     | 1 <sup>+</sup> | $\leftarrow$ | 8    | 2      | 7      | 0 <sup>+</sup> | 7340.2251 | 0.0180     |
| 9                    | 1     | 8     | 1 <sup>+</sup> | $\leftarrow$ | 8    | 1      | 7      | 0 <sup>+</sup> | 7495.8369 | -0.0084    |
| 9                    | 2     | 7     | 1 <sup>+</sup> | $\leftarrow$ | 8    | 2      | 6      | 0 <sup>+</sup> | 7552.0831 | -0.0037    |
| 10                   | 1     | 10    | 1 <sup>+</sup> | $\leftarrow$ | 9    | 1      | 9      | 0 <sup>+</sup> | 7912.3058 | 0.0066     |
| $0^- \leftarrow 1^-$ |       |       |                |              |      |        |        |                |           |            |
| 3                    | 1     | 3     | 0 <sup>-</sup> | $\leftarrow$ | 2    | 1      | 2      | 1 <sup>-</sup> | 2389.0976 | -0.0147    |
| 3                    | 0     | 3     | 0 <sup>-</sup> | $\leftarrow$ | 2    | 0      | 2      | 1 <sup>-</sup> | 2449.4295 | 0.0034     |
| 3                    | 1     | 2     | 0 <sup>-</sup> | $\leftarrow$ | 2    | 1      | 1      | 1 <sup>-</sup> | 2526.1023 | -0.0107    |
| 4                    | 1     | 4     | 0 <sup>-</sup> | $\leftarrow$ | 3    | 1      | 3      | 1 <sup>-</sup> | 3184.9671 | 0.0006     |
| 4                    | 0     | 4     | 0 <sup>-</sup> | $\leftarrow$ | 3    | 0      | 3      | 1 <sup>-</sup> | 3256.8970 | 0.0105     |
| 4                    | 2     | 3     | 0 <sup>-</sup> | $\leftarrow$ | 3    | 2      | 2      | 1 <sup>-</sup> | 3278.9222 | 0.0148     |
| 4                    | 1     | 3     | 0 <sup>-</sup> | $\leftarrow$ | 3    | 1      | 2      | 1 <sup>-</sup> | 3367.7024 | 0.0216     |
| 5                    | 1     | 5     | 0 <sup>-</sup> | $\leftarrow$ | 4    | 1      | 4      | 1 <sup>-</sup> | 3978.7929 | 0.0052     |
| 5                    | 0     | 5     | 0 <sup>-</sup> | $\leftarrow$ | 4    | 0      | 4      | 1 <sup>-</sup> | 4055.5954 | -0.0010    |
| 5                    | 2     | 4     | 0 <sup>-</sup> | $\leftarrow$ | 4    | 2      | 3      | 1 <sup>-</sup> | 4097.7613 | 0.0124     |
| 5                    | 3     | 3     | 0 <sup>-</sup> | $\leftarrow$ | 4    | 3      | 2      | 1 <sup>-</sup> | 4109.9931 | 0.0011     |
| 5                    | 3     | 2     | 0 <sup>-</sup> | $\leftarrow$ | 4    | 3      | 1      | 1 <sup>-</sup> | 4111.7408 | -0.0185    |
| 5                    | 2     | 3     | 0 <sup>-</sup> | $\leftarrow$ | 4    | 2      | 2      | 1 <sup>-</sup> | 4145.3611 | 0.0110     |
| 5                    | 1     | 4     | 0 <sup>-</sup> | $\leftarrow$ | 4    | 1      | 3      | 1 <sup>-</sup> | 4206.3021 | 0.0102     |
| 6                    | 1     | 6     | 0 <sup>-</sup> | $\leftarrow$ | 5    | 1      | 5      | 1 <sup>-</sup> | 4770.2499 | -0.0003    |
| 6                    | 0     | 6     | 0 <sup>-</sup> | $\leftarrow$ | 5    | 0      | 5      | 1 <sup>-</sup> | 4845.0604 | -0.0055    |
| 6                    | 2     | 5     | 0 <sup>-</sup> | $\leftarrow$ | 5    | 2      | 4      | 1 <sup>-</sup> | 4914.4069 | 0.0083     |
| 6                    | 3     | 4     | 0 <sup>-</sup> | $\leftarrow$ | 5    | 3      | 3      | 1 <sup>-</sup> | 4936.1523 | 0.0062     |
| 6                    | 3     | 3     | 0 <sup>-</sup> | $\leftarrow$ | 5    | 3      | 2      | 1 <sup>-</sup> | 4940.8251 | 0.0089     |
| 6                    | 2     | 4     | 0 <sup>-</sup> | $\leftarrow$ | 5    | 2      | 3      | 1 <sup>-</sup> | 4994.0343 | -0.0081    |
| 6                    | 1     | 5     | 0 <sup>-</sup> | $\leftarrow$ | 5    | 1      | 4      | 1 <sup>-</sup> | 5040.5325 | -0.0111    |
| 7                    | 1     | 7     | 0 <sup>-</sup> | $\leftarrow$ | 6    | 1      | 6      | 1 <sup>-</sup> | 5559.2098 | 0.0006     |
| 7                    | 0     | 7     | 0 <sup>-</sup> | $\leftarrow$ | 6    | 0      | 6      | 1 <sup>-</sup> | 5626.3696 | -0.0109    |
| 7                    | 2     | 6     | 0 <sup>-</sup> | $\leftarrow$ | 6    | 2      | 5      | 1 <sup>-</sup> | 5728.3149 | -0.0097    |
| 7                    | 3     | 5     | 0 <sup>-</sup> | $\leftarrow$ | 6    | 3      | 4      | 1 <sup>-</sup> | 5762.4420 | -0.0034    |
| 7                    | 3     | 4     | 0 <sup>-</sup> | $\leftarrow$ | 6    | 3      | 3      | 1 <sup>-</sup> | 5772.8050 | 0.0046     |
| 7                    | 2     | 5     | 0 <sup>-</sup> | $\leftarrow$ | 6    | 2      | 4      | 1 <sup>-</sup> | 5847.5058 | -0.0123    |
| 7                    | 1     | 6     | 0 <sup>-</sup> | $\leftarrow$ | 6    | 1      | 5      | 1 <sup>-</sup> | 5868.9994 | -0.0037    |
| 8                    | 1     | 8     | 0 <sup>-</sup> | $\leftarrow$ | 7    | 1      | 7      | 1 <sup>-</sup> | 6345.6805 | -0.0111    |
| 8                    | 0     | 8     | 0 <sup>-</sup> | $\leftarrow$ | 7    | 0      | 7      | 1 <sup>-</sup> | 6401.8374 | 0.0009     |
| 8                    | 3     | 5     | 0 <sup>-</sup> | $\leftarrow$ | 7    | 3      | 4      | 1 <sup>-</sup> | 6608.6287 | -0.0006    |

| $J$                                  | $K_a$ | $K_c$ | $v$            | $\leftarrow$ | $J'$ | $K_a'$ | $K_c'$ | $v'$           | $V_{obs}$ | $V_{obs}-V_{calc}$ |
|--------------------------------------|-------|-------|----------------|--------------|------|--------|--------|----------------|-----------|--------------------|
| 8                                    | 1     | 7     | 0 <sup>-</sup> | $\leftarrow$ | 7    | 1      | 6      | 1 <sup>-</sup> | 6690.2100 | 0.0011             |
| 8                                    | 2     | 6     | 0 <sup>-</sup> | $\leftarrow$ | 7    | 2      | 5      | 1 <sup>-</sup> | 6702.8358 | 0.0004             |
| 9                                    | 1     | 9     | 0 <sup>-</sup> | $\leftarrow$ | 8    | 1      | 8      | 1 <sup>-</sup> | 7129.8691 | -0.0018            |
| 9                                    | 0     | 9     | 0 <sup>-</sup> | $\leftarrow$ | 8    | 0      | 8      | 1 <sup>-</sup> | 7174.0665 | 0.0012             |
| 9                                    | 2     | 8     | 0 <sup>-</sup> | $\leftarrow$ | 8    | 2      | 7      | 1 <sup>-</sup> | 7346.3385 | -0.0153            |
| 9                                    | 1     | 8     | 0 <sup>-</sup> | $\leftarrow$ | 8    | 1      | 7      | 1 <sup>-</sup> | 7502.8377 | 0.0239             |
| 9                                    | 2     | 7     | 0 <sup>-</sup> | $\leftarrow$ | 8    | 2      | 6      | 1 <sup>-</sup> | 7556.8675 | 0.0032             |
| 10                                   | 1     | 10    | 0 <sup>-</sup> | $\leftarrow$ | 9    | 1      | 9      | 1 <sup>-</sup> | 7912.0319 | 0.0099             |
| <b>1<sup>-</sup> ← 0<sup>-</sup></b> |       |       |                |              |      |        |        |                |           |                    |
| 3                                    | 1     | 3     | 1 <sup>-</sup> | $\leftarrow$ | 2    | 1      | 2      | 0 <sup>-</sup> | 2397.7587 | 0.0203             |
| 3                                    | 0     | 3     | 1 <sup>-</sup> | $\leftarrow$ | 2    | 0      | 2      | 0 <sup>-</sup> | 2455.8832 | 0.0031             |
| 3                                    | 1     | 2     | 1 <sup>-</sup> | $\leftarrow$ | 2    | 1      | 1      | 0 <sup>-</sup> | 2530.7031 | -0.0049            |
| 4                                    | 1     | 4     | 1 <sup>-</sup> | $\leftarrow$ | 3    | 1      | 3      | 0 <sup>-</sup> | 3192.1116 | 0.0066             |
| 4                                    | 0     | 4     | 1 <sup>-</sup> | $\leftarrow$ | 3    | 0      | 3      | 0 <sup>-</sup> | 3261.2265 | -0.0015            |
| 4                                    | 2     | 3     | 1 <sup>-</sup> | $\leftarrow$ | 3    | 2      | 2      | 0 <sup>-</sup> | 3283.7286 | 0.0111             |
| 4                                    | 1     | 3     | 1 <sup>-</sup> | $\leftarrow$ | 3    | 1      | 2      | 0 <sup>-</sup> | 3368.5087 | -0.0033            |
| 5                                    | 1     | 5     | 1 <sup>-</sup> | $\leftarrow$ | 4    | 1      | 4      | 0 <sup>-</sup> | 3984.3642 | -0.0069            |
| 5                                    | 0     | 5     | 1 <sup>-</sup> | $\leftarrow$ | 4    | 0      | 4      | 0 <sup>-</sup> | 4058.1382 | 0.0002             |
| 5                                    | 2     | 4     | 1 <sup>-</sup> | $\leftarrow$ | 4    | 2      | 3      | 0 <sup>-</sup> | 4099.3374 | -0.0092            |
| 5                                    | 3     | 3     | 1 <sup>-</sup> | $\leftarrow$ | 4    | 3      | 2      | 0 <sup>-</sup> | 4113.2107 | -0.0038            |
| 5                                    | 3     | 2     | 1 <sup>-</sup> | $\leftarrow$ | 4    | 3      | 1      | 0 <sup>-</sup> | 4114.9721 | -0.0052            |
| 5                                    | 2     | 3     | 1 <sup>-</sup> | $\leftarrow$ | 4    | 2      | 2      | 0 <sup>-</sup> | 4146.1318 | 0.0115             |
| 5                                    | 1     | 4     | 1 <sup>-</sup> | $\leftarrow$ | 4    | 1      | 3      | 0 <sup>-</sup> | 4203.5264 | -0.0075            |
| 6                                    | 1     | 6     | 1 <sup>-</sup> | $\leftarrow$ | 5    | 1      | 5      | 0 <sup>-</sup> | 4774.3739 | -0.0059            |
| 6                                    | 0     | 6     | 1 <sup>-</sup> | $\leftarrow$ | 5    | 0      | 5      | 0 <sup>-</sup> | 4846.3721 | 0.0026             |
| 6                                    | 2     | 5     | 1 <sup>-</sup> | $\leftarrow$ | 5    | 2      | 4      | 0 <sup>-</sup> | 4913.0603 | -0.0022            |
| 6                                    | 3     | 4     | 1 <sup>-</sup> | $\leftarrow$ | 5    | 3      | 3      | 0 <sup>-</sup> | 4935.9670 | -0.0070            |
| 6                                    | 3     | 3     | 1 <sup>-</sup> | $\leftarrow$ | 5    | 3      | 2      | 0 <sup>-</sup> | 4940.6364 | -0.0111            |
| 6                                    | 2     | 4     | 1 <sup>-</sup> | $\leftarrow$ | 5    | 2      | 3      | 0 <sup>-</sup> | 4991.5908 | 0.0133             |
| 6                                    | 1     | 5     | 1 <sup>-</sup> | $\leftarrow$ | 5    | 1      | 4      | 0 <sup>-</sup> | 5034.9854 | 0.0068             |
| 7                                    | 1     | 7     | 1 <sup>-</sup> | $\leftarrow$ | 6    | 1      | 6      | 0 <sup>-</sup> | 5562.1010 | 0.0013             |
| 7                                    | 0     | 7     | 1 <sup>-</sup> | $\leftarrow$ | 6    | 0      | 6      | 0 <sup>-</sup> | 5627.0116 | -0.0054            |
| 7                                    | 2     | 6     | 1 <sup>-</sup> | $\leftarrow$ | 6    | 2      | 5      | 0 <sup>-</sup> | 5724.6467 | 0.0023             |
| 7                                    | 3     | 5     | 1 <sup>-</sup> | $\leftarrow$ | 6    | 3      | 4      | 0 <sup>-</sup> | 5759.6212 | 0.0056             |
| 7                                    | 3     | 4     | 1 <sup>-</sup> | $\leftarrow$ | 6    | 3      | 3      | 0 <sup>-</sup> | 5770.0188 | -0.0018            |
| 7                                    | 2     | 5     | 1 <sup>-</sup> | $\leftarrow$ | 6    | 2      | 4      | 0 <sup>-</sup> | 5842.8458 | 0.0047             |
| 7                                    | 1     | 6     | 1 <sup>-</sup> | $\leftarrow$ | 6    | 1      | 5      | 0 <sup>-</sup> | 5861.8220 | 0.0226             |
| 8                                    | 1     | 8     | 1 <sup>-</sup> | $\leftarrow$ | 7    | 1      | 7      | 0 <sup>-</sup> | 6347.6071 | -0.0052            |
| 8                                    | 0     | 8     | 1 <sup>-</sup> | $\leftarrow$ | 7    | 0      | 7      | 0 <sup>-</sup> | 6402.2104 | -0.0068            |
| 8                                    | 3     | 5     | 1 <sup>-</sup> | $\leftarrow$ | 7    | 3      | 4      | 0 <sup>-</sup> | 6604.3608 | -0.0003            |
| 8                                    | 1     | 7     | 1 <sup>-</sup> | $\leftarrow$ | 7    | 1      | 6      | 0 <sup>-</sup> | 6682.6660 | 0.0070             |
| 8                                    | 2     | 6     | 1 <sup>-</sup> | $\leftarrow$ | 7    | 2      | 5      | 0 <sup>-</sup> | 6697.3683 | -0.0040            |
| 9                                    | 1     | 9     | 1 <sup>-</sup> | $\leftarrow$ | 8    | 1      | 8      | 0 <sup>-</sup> | 7131.0936 | 0.0033             |
| 9                                    | 0     | 9     | 1 <sup>-</sup> | $\leftarrow$ | 8    | 0      | 8      | 0 <sup>-</sup> | 7174.3699 | -0.0117            |
| 9                                    | 2     | 8     | 1 <sup>-</sup> | $\leftarrow$ | 8    | 2      | 7      | 0 <sup>-</sup> | 7340.3924 | 0.0136             |
| 9                                    | 1     | 8     | 1 <sup>-</sup> | $\leftarrow$ | 8    | 1      | 7      | 0 <sup>-</sup> | 7495.9521 | -0.0211            |
| 9                                    | 2     | 7     | 1 <sup>-</sup> | $\leftarrow$ | 8    | 2      | 6      | 0 <sup>-</sup> | 7552.0831 | -0.0037            |
| 10                                   | 1     | 10    | 1 <sup>-</sup> | $\leftarrow$ | 9    | 1      | 9      | 0 <sup>-</sup> | 7912.7791 | 0.0119             |
| <b><sup>c</sup>R-branch</b>          |       |       |                |              |      |        |        |                |           |                    |
| <b>0<sup>+</sup> ← 0<sup>+</sup></b> |       |       |                |              |      |        |        |                |           |                    |
| 2                                    | 1     | 1     | 0 <sup>+</sup> | $\leftarrow$ | 1    | 0      | 1      | 0 <sup>+</sup> | 2326.0748 | 0.0055             |
| 3                                    | 1     | 2     | 0 <sup>+</sup> | $\leftarrow$ | 2    | 0      | 2      | 0 <sup>+</sup> | 3215.8014 | 0.0253             |
| 2                                    | 2     | 0     | 0 <sup>+</sup> | $\leftarrow$ | 1    | 1      | 0      | 0 <sup>+</sup> | 3470.0719 | -0.0040            |
| 2                                    | 2     | 1     | 0 <sup>+</sup> | $\leftarrow$ | 1    | 1      | 1      | 0 <sup>+</sup> | 3512.9264 | 0.0019             |
| 4                                    | 1     | 3     | 0 <sup>+</sup> | $\leftarrow$ | 3    | 0      | 3      | 0 <sup>+</sup> | 4131.7409 | 0.0236             |
| 3                                    | 2     | 1     | 0 <sup>+</sup> | $\leftarrow$ | 2    | 1      | 1      | 0 <sup>+</sup> | 4255.6943 | -0.0091            |
| 4                                    | 2     | 2     | 0 <sup>+</sup> | $\leftarrow$ | 3    | 1      | 2      | 0 <sup>+</sup> | 5032.7545 | -0.0237            |
| 4                                    | 2     | 3     | 0 <sup>+</sup> | $\leftarrow$ | 3    | 1      | 3      | 0 <sup>+</sup> | 5267.5733 | 0.0033             |
| 3                                    | 3     | 0     | 0 <sup>+</sup> | $\leftarrow$ | 2    | 2      | 0      | 0 <sup>+</sup> | 5542.5001 | -0.0085            |

| $J$                  | $K_a$ | $K_c$ | $v$            | $\leftarrow$ | $J'$ | $K_a'$ | $K_c'$ | $v'$           | $V_{\text{obs}}$ | $V_{\text{obs}}-V_{\text{calc}}$ |
|----------------------|-------|-------|----------------|--------------|------|--------|--------|----------------|------------------|----------------------------------|
| 3                    | 3     | 1     | 0 <sup>+</sup> | $\leftarrow$ | 2    | 2      | 1      | 0 <sup>+</sup> | 5544.9003        | -0.0077                          |
| 5                    | 2     | 3     | 0 <sup>+</sup> | $\leftarrow$ | 4    | 1      | 3      | 0 <sup>+</sup> | 5810.3348        | -0.0047                          |
| 6                    | 1     | 5     | 0 <sup>+</sup> | $\leftarrow$ | 5    | 0      | 5      | 0 <sup>+</sup> | 6059.1203        | -0.0065                          |
| 5                    | 2     | 4     | 0 <sup>+</sup> | $\leftarrow$ | 4    | 1      | 4      | 0 <sup>+</sup> | 6178.0264        | 0.0110                           |
| 4                    | 3     | 1     | 0 <sup>+</sup> | $\leftarrow$ | 3    | 2      | 1      | 0 <sup>+</sup> | 6358.8058        | 0.0141                           |
| 4                    | 3     | 2     | 0 <sup>+</sup> | $\leftarrow$ | 3    | 2      | 2      | 0 <sup>+</sup> | 6370.5386        | -0.0045                          |
| 6                    | 2     | 4     | 0 <sup>+</sup> | $\leftarrow$ | 5    | 1      | 4      | 0 <sup>+</sup> | 6598.1199        | -0.0056                          |
| 7                    | 1     | 6     | 0 <sup>+</sup> | $\leftarrow$ | 6    | 0      | 6      | 0 <sup>+</sup> | 7078.9580        | -0.0079                          |
| 6                    | 2     | 5     | 0 <sup>+</sup> | $\leftarrow$ | 5    | 1      | 5      | 0 <sup>+</sup> | 7110.5126        | 0.0002                           |
| 5                    | 3     | 2     | 0 <sup>+</sup> | $\leftarrow$ | 4    | 2      | 2      | 0 <sup>+</sup> | 7166.6305        | 0.0232                           |
| 5                    | 3     | 3     | 0 <sup>+</sup> | $\leftarrow$ | 4    | 2      | 3      | 0 <sup>+</sup> | 7200.9214        | -0.0022                          |
| 7                    | 2     | 5     | 0 <sup>+</sup> | $\leftarrow$ | 6    | 1      | 5      | 0 <sup>+</sup> | 7405.4133        | -0.0005                          |
| 4                    | 4     | 0     | 0 <sup>+</sup> | $\leftarrow$ | 3    | 3      | 0      | 0 <sup>+</sup> | 7596.8180        | -0.0051                          |
| 4                    | 4     | 1     | 0 <sup>+</sup> | $\leftarrow$ | 3    | 3      | 1      | 0 <sup>+</sup> | 7596.9032        | -0.0024                          |
| 6                    | 3     | 3     | 0 <sup>+</sup> | $\leftarrow$ | 5    | 2      | 3      | 0 <sup>+</sup> | 7961.4059        | 0.0097                           |
| $1^+ \leftarrow 1^+$ |       |       |                |              |      |        |        |                |                  |                                  |
| 3                    | 1     | 2     | 1 <sup>+</sup> | $\leftarrow$ | 2    | 0      | 2      | 1 <sup>+</sup> | 3213.4742        | 0.0117                           |
| 2                    | 2     | 0     | 1 <sup>+</sup> | $\leftarrow$ | 1    | 1      | 0      | 1 <sup>+</sup> | 3470.0719        | -0.0040                          |
| 2                    | 2     | 1     | 1 <sup>+</sup> | $\leftarrow$ | 1    | 1      | 1      | 1 <sup>+</sup> | 3512.4091        | 0.0070                           |
| 4                    | 1     | 3     | 1 <sup>+</sup> | $\leftarrow$ | 3    | 0      | 3      | 1 <sup>+</sup> | 4128.5677        | 0.0028                           |
| 3                    | 2     | 1     | 1 <sup>+</sup> | $\leftarrow$ | 2    | 1      | 1      | 1 <sup>+</sup> | 4255.5533        | 0.0104                           |
| 4                    | 2     | 2     | 1 <sup>+</sup> | $\leftarrow$ | 3    | 1      | 2      | 1 <sup>+</sup> | 5032.6576        | -0.0070                          |
| 5                    | 1     | 4     | 1 <sup>+</sup> | $\leftarrow$ | 4    | 0      | 4      | 1 <sup>+</sup> | 5074.1953        | 0.0083                           |
| 4                    | 2     | 3     | 1 <sup>+</sup> | $\leftarrow$ | 3    | 1      | 3      | 1 <sup>+</sup> | 5265.2561        | -0.0144                          |
| 3                    | 3     | 0     | 1 <sup>+</sup> | $\leftarrow$ | 2    | 2      | 0      | 1 <sup>+</sup> | 5542.2724        | 0.0093                           |
| 3                    | 3     | 1     | 1 <sup>+</sup> | $\leftarrow$ | 2    | 2      | 1      | 1 <sup>+</sup> | 5544.6425        | 0.0100                           |
| 5                    | 2     | 3     | 1 <sup>+</sup> | $\leftarrow$ | 4    | 1      | 3      | 1 <sup>+</sup> | 5810.3348        | -0.0047                          |
| 6                    | 1     | 5     | 1 <sup>+</sup> | $\leftarrow$ | 5    | 0      | 5      | 1 <sup>+</sup> | 6055.0125        | 0.0056                           |
| 5                    | 2     | 4     | 1 <sup>+</sup> | $\leftarrow$ | 4    | 1      | 4      | 1 <sup>+</sup> | 6174.9382        | -0.0059                          |
| 4                    | 3     | 1     | 1 <sup>+</sup> | $\leftarrow$ | 3    | 2      | 1      | 1 <sup>+</sup> | 6358.2317        | -0.0027                          |
| 4                    | 3     | 2     | 1 <sup>+</sup> | $\leftarrow$ | 3    | 2      | 2      | 1 <sup>+</sup> | 6369.8746        | 0.0003                           |
| 6                    | 2     | 4     | 1 <sup>+</sup> | $\leftarrow$ | 5    | 1      | 4      | 1 <sup>+</sup> | 6598.3820        | 0.0119                           |
| 7                    | 1     | 6     | 1 <sup>+</sup> | $\leftarrow$ | 6    | 0      | 6      | 1 <sup>+</sup> | 7074.8114        | -0.0069                          |
| 6                    | 2     | 5     | 1 <sup>+</sup> | $\leftarrow$ | 5    | 1      | 5      | 1 <sup>+</sup> | 7106.8689        | -0.0056                          |
| 5                    | 3     | 2     | 1 <sup>+</sup> | $\leftarrow$ | 4    | 2      | 2      | 1 <sup>+</sup> | 7166.0115        | -0.0055                          |
| 5                    | 3     | 3     | 1 <sup>+</sup> | $\leftarrow$ | 4    | 2      | 3      | 1 <sup>+</sup> | 7200.0509        | -0.0008                          |
| 7                    | 2     | 5     | 1 <sup>+</sup> | $\leftarrow$ | 6    | 1      | 5      | 1 <sup>+</sup> | 7406.0042        | 0.0065                           |
| 4                    | 4     | 0     | 1 <sup>+</sup> | $\leftarrow$ | 3    | 3      | 0      | 1 <sup>+</sup> | 7596.5876        | -0.0001                          |
| 4                    | 4     | 1     | 1 <sup>+</sup> | $\leftarrow$ | 3    | 3      | 1      | 1 <sup>+</sup> | 7596.6725        | 0.0026                           |
| 6                    | 3     | 3     | 1 <sup>+</sup> | $\leftarrow$ | 5    | 2      | 3      | 1 <sup>+</sup> | 7961.0572        | -0.0010                          |
| $0^- \leftarrow 0^-$ |       |       |                |              |      |        |        |                |                  |                                  |
| 2                    | 1     | 1     | 0 <sup>-</sup> | $\leftarrow$ | 1    | 0      | 1      | 0 <sup>-</sup> | 2326.1786        | 0.0018                           |
| 3                    | 1     | 2     | 0 <sup>-</sup> | $\leftarrow$ | 2    | 0      | 2      | 0 <sup>-</sup> | 3215.8879        | 0.0229                           |
| 2                    | 2     | 0     | 0 <sup>-</sup> | $\leftarrow$ | 1    | 1      | 0      | 0 <sup>-</sup> | 3470.4492        | -0.0021                          |
| 2                    | 2     | 1     | 0 <sup>-</sup> | $\leftarrow$ | 1    | 1      | 1      | 0 <sup>-</sup> | 3513.2395        | -0.0066                          |
| 4                    | 1     | 3     | 0 <sup>-</sup> | $\leftarrow$ | 3    | 0      | 3      | 0 <sup>-</sup> | 4131.7409        | 0.0236                           |
| 3                    | 2     | 1     | 0 <sup>-</sup> | $\leftarrow$ | 2    | 1      | 1      | 0 <sup>-</sup> | 4256.0790        | -0.0115                          |
| 3                    | 2     | 2     | 0 <sup>-</sup> | $\leftarrow$ | 2    | 1      | 2      | 0 <sup>-</sup> | 4379.5099        | -0.0136                          |
| 4                    | 2     | 2     | 0 <sup>-</sup> | $\leftarrow$ | 3    | 1      | 2      | 0 <sup>-</sup> | 5033.1917        | -0.0076                          |
| 5                    | 1     | 4     | 0 <sup>-</sup> | $\leftarrow$ | 4    | 0      | 4      | 0 <sup>-</sup> | 5077.9093        | -0.0053                          |
| 4                    | 2     | 3     | 0 <sup>-</sup> | $\leftarrow$ | 3    | 1      | 3      | 0 <sup>-</sup> | 5267.8731        | -0.0018                          |
| 3                    | 3     | 0     | 0 <sup>-</sup> | $\leftarrow$ | 2    | 2      | 0      | 0 <sup>-</sup> | 5543.0596        | -0.0016                          |
| 3                    | 3     | 1     | 0 <sup>-</sup> | $\leftarrow$ | 2    | 2      | 1      | 0 <sup>-</sup> | 5545.4544        | -0.0027                          |
| 6                    | 1     | 5     | 0 <sup>-</sup> | $\leftarrow$ | 5    | 0      | 5      | 0 <sup>-</sup> | 6058.9798        | -0.0071                          |
| 5                    | 2     | 4     | 0 <sup>-</sup> | $\leftarrow$ | 4    | 1      | 4      | 0 <sup>-</sup> | 6178.2855        | 0.0004                           |
| 4                    | 3     | 1     | 0 <sup>-</sup> | $\leftarrow$ | 3    | 2      | 1      | 0 <sup>-</sup> | 6359.3656        | 0.0040                           |
| 4                    | 3     | 2     | 0 <sup>-</sup> | $\leftarrow$ | 3    | 2      | 2      | 0 <sup>-</sup> | 6371.1133        | 0.0000                           |
| 6                    | 2     | 4     | 0 <sup>-</sup> | $\leftarrow$ | 5    | 1      | 4      | 0 <sup>-</sup> | 6598.5395        | -0.0062                          |
| 7                    | 1     | 6     | 0 <sup>-</sup> | $\leftarrow$ | 6    | 0      | 6      | 0 <sup>-</sup> | 7078.6737        | -0.0060                          |

| $J$                  | $K_a$ | $K_c$ | $v$            | $\leftarrow$ | $J'$ | $K_a'$ | $K_c'$ | $v'$           | $V_{\text{obs}}$ | $V_{\text{obs}}-V_{\text{calc}}$ |
|----------------------|-------|-------|----------------|--------------|------|--------|--------|----------------|------------------|----------------------------------|
| 6                    | 2     | 5     | 0 <sup>-</sup> | $\leftarrow$ | 5    | 1      | 5      | 0 <sup>-</sup> | 7110.7194        | -0.0082                          |
| 5                    | 3     | 2     | 0 <sup>-</sup> | $\leftarrow$ | 4    | 2      | 2      | 0 <sup>-</sup> | 7167.2249        | 0.0132                           |
| 5                    | 3     | 3     | 0 <sup>-</sup> | $\leftarrow$ | 4    | 2      | 3      | 0 <sup>-</sup> | 7201.5040        | -0.0010                          |
| 7                    | 2     | 5     | 0 <sup>-</sup> | $\leftarrow$ | 6    | 1      | 5      | 0 <sup>-</sup> | 7405.7762        | -0.0068                          |
| 4                    | 4     | 0     | 0 <sup>-</sup> | $\leftarrow$ | 3    | 3      | 0      | 0 <sup>-</sup> | 7597.5877        | -0.0050                          |
| 4                    | 4     | 1     | 0 <sup>-</sup> | $\leftarrow$ | 3    | 3      | 1      | 0 <sup>-</sup> | 7597.6743        | -0.0007                          |
| 6                    | 3     | 3     | 0 <sup>-</sup> | $\leftarrow$ | 5    | 2      | 3      | 0 <sup>-</sup> | 7962.1002        | 0.0163                           |
| $1^- \leftarrow 1^-$ |       |       |                |              |      |        |        |                |                  |                                  |
| 3                    | 1     | 2     | 1 <sup>-</sup> | $\leftarrow$ | 2    | 0      | 2      | 1 <sup>-</sup> | 3213.4742        | 0.0117                           |
| 2                    | 2     | 0     | 1 <sup>-</sup> | $\leftarrow$ | 1    | 1      | 0      | 1 <sup>-</sup> | 3470.3911        | -0.0031                          |
| 2                    | 2     | 1     | 1 <sup>-</sup> | $\leftarrow$ | 1    | 1      | 1      | 1 <sup>-</sup> | 3512.7224        | 0.0117                           |
| 4                    | 1     | 3     | 1 <sup>-</sup> | $\leftarrow$ | 3    | 0      | 3      | 1 <sup>-</sup> | 4128.5033        | -0.0058                          |
| 3                    | 2     | 1     | 1 <sup>-</sup> | $\leftarrow$ | 2    | 1      | 1      | 1 <sup>-</sup> | 4255.9292        | -0.0004                          |
| 3                    | 2     | 2     | 1 <sup>-</sup> | $\leftarrow$ | 2    | 1      | 2      | 1 <sup>-</sup> | 4378.0422        | -0.0243                          |
| 4                    | 2     | 2     | 1 <sup>-</sup> | $\leftarrow$ | 3    | 1      | 2      | 1 <sup>-</sup> | 5033.0969        | 0.0090                           |
| 5                    | 1     | 4     | 1 <sup>-</sup> | $\leftarrow$ | 4    | 0      | 4      | 1 <sup>-</sup> | 5074.0542        | 0.0144                           |
| 4                    | 2     | 3     | 1 <sup>-</sup> | $\leftarrow$ | 3    | 1      | 3      | 1 <sup>-</sup> | 5265.4860        | -0.0166                          |
| 3                    | 3     | 0     | 1 <sup>-</sup> | $\leftarrow$ | 2    | 2      | 0      | 1 <sup>-</sup> | 5542.8237        | 0.0102                           |
| 3                    | 3     | 1     | 1 <sup>-</sup> | $\leftarrow$ | 2    | 2      | 1      | 1 <sup>-</sup> | 5545.1871        | 0.0086                           |
| 5                    | 2     | 3     | 1 <sup>-</sup> | $\leftarrow$ | 4    | 1      | 3      | 1 <sup>-</sup> | 5810.8090        | 0.0138                           |
| 6                    | 1     | 5     | 1 <sup>-</sup> | $\leftarrow$ | 5    | 0      | 5      | 1 <sup>-</sup> | 6054.7524        | 0.0099                           |
| 5                    | 2     | 4     | 1 <sup>-</sup> | $\leftarrow$ | 4    | 1      | 4      | 1 <sup>-</sup> | 6175.1044        | -0.0123                          |
| 4                    | 3     | 1     | 1 <sup>-</sup> | $\leftarrow$ | 3    | 2      | 1      | 1 <sup>-</sup> | 6358.8058        | 0.0141                           |
| 4                    | 3     | 2     | 1 <sup>-</sup> | $\leftarrow$ | 3    | 2      | 2      | 1 <sup>-</sup> | 6370.4292        | 0.0012                           |
| 6                    | 2     | 4     | 1 <sup>-</sup> | $\leftarrow$ | 5    | 1      | 4      | 1 <sup>-</sup> | 6598.8166        | 0.0081                           |
| 7                    | 1     | 6     | 1 <sup>-</sup> | $\leftarrow$ | 6    | 0      | 6      | 1 <sup>-</sup> | 7074.4247        | 0.0112                           |
| 6                    | 2     | 5     | 1 <sup>-</sup> | $\leftarrow$ | 5    | 1      | 5      | 1 <sup>-</sup> | 7106.9625        | -0.0139                          |
| 5                    | 3     | 2     | 1 <sup>-</sup> | $\leftarrow$ | 4    | 2      | 2      | 1 <sup>-</sup> | 7166.6305        | 0.0232                           |
| 5                    | 3     | 3     | 1 <sup>-</sup> | $\leftarrow$ | 4    | 2      | 3      | 1 <sup>-</sup> | 7200.6092        | -0.0012                          |
| 7                    | 2     | 5     | 1 <sup>-</sup> | $\leftarrow$ | 6    | 1      | 5      | 1 <sup>-</sup> | 7406.3887        | -0.0099                          |
| 4                    | 4     | 0     | 1 <sup>-</sup> | $\leftarrow$ | 3    | 3      | 0      | 1 <sup>-</sup> | 7597.3514        | -0.0032                          |
| 4                    | 4     | 1     | 1 <sup>-</sup> | $\leftarrow$ | 3    | 3      | 1      | 1 <sup>-</sup> | 7597.4355        | -0.0010                          |
| 6                    | 3     | 3     | 1 <sup>-</sup> | $\leftarrow$ | 5    | 2      | 3      | 1 <sup>-</sup> | 7961.7375        | -0.0014                          |

**Table S12** Measured frequencies ( $v_{\text{obs}}$ ) in MHz and residuals ( $v_{\text{obs}} - v_{\text{calc}}$ ) in MHz of the rotational transitions of the parent species of Phe-HDO.

| ${}^a R\text{-branch}$ |       |       |                |              |      |        |        |                |                  |                                  |
|------------------------|-------|-------|----------------|--------------|------|--------|--------|----------------|------------------|----------------------------------|
| $J$                    | $K_a$ | $K_c$ | $v$            | $\leftarrow$ | $J'$ | $K_a'$ | $K_c'$ | $v'$           | $V_{\text{obs}}$ | $V_{\text{obs}}-V_{\text{calc}}$ |
| $0^+ \leftarrow 1^-$   |       |       |                |              |      |        |        |                |                  |                                  |
| 3                      | 1     | 3     | 0 <sup>+</sup> | $\leftarrow$ | 2    | 1      | 2      | 1 <sup>-</sup> | 2397.1446        | -0.0026                          |
| 3                      | 0     | 3     | 0 <sup>+</sup> | $\leftarrow$ | 2    | 0      | 2      | 1 <sup>-</sup> | 2459.7312        | 0.0150                           |
| 3                      | 1     | 2     | 0 <sup>+</sup> | $\leftarrow$ | 2    | 1      | 1      | 1 <sup>-</sup> | 2540.4869        | -0.0054                          |
| 4                      | 1     | 4     | 0 <sup>+</sup> | $\leftarrow$ | 3    | 1      | 3      | 1 <sup>-</sup> | 3193.3373        | 0.0016                           |
| 4                      | 0     | 4     | 0 <sup>+</sup> | $\leftarrow$ | 3    | 0      | 3      | 1 <sup>-</sup> | 3267.4857        | -0.0017                          |
| 4                      | 2     | 3     | 0 <sup>+</sup> | $\leftarrow$ | 3    | 2      | 2      | 1 <sup>-</sup> | 3291.9789        | 0.0043                           |
| 4                      | 2     | 2     | 0 <sup>+</sup> | $\leftarrow$ | 3    | 2      | 1      | 1 <sup>-</sup> | 3318.6245        | -0.0083                          |
| 4                      | 1     | 3     | 0 <sup>+</sup> | $\leftarrow$ | 3    | 1      | 2      | 1 <sup>-</sup> | 3384.0393        | 0.0066                           |
| 5                      | 1     | 5     | 0 <sup>+</sup> | $\leftarrow$ | 4    | 1      | 4      | 1 <sup>-</sup> | 3987.2665        | -0.0045                          |
| 5                      | 0     | 5     | 0 <sup>+</sup> | $\leftarrow$ | 4    | 0      | 4      | 1 <sup>-</sup> | 4065.8703        | 0.0044                           |
| 5                      | 2     | 4     | 0 <sup>+</sup> | $\leftarrow$ | 4    | 2      | 3      | 1 <sup>-</sup> | 4111.6622        | 0.0046                           |
| 5                      | 3     | 3     | 0 <sup>+</sup> | $\leftarrow$ | 4    | 3      | 2      | 1 <sup>-</sup> | 4125.9813        | 0.0005                           |
| 5                      | 3     | 2     | 0 <sup>+</sup> | $\leftarrow$ | 4    | 3      | 1      | 1 <sup>-</sup> | 4127.9993        | 0.0001                           |
| 5                      | 2     | 3     | 0 <sup>+</sup> | $\leftarrow$ | 4    | 2      | 2      | 1 <sup>-</sup> | 4163.5460        | 0.0027                           |
| 5                      | 1     | 4     | 0 <sup>+</sup> | $\leftarrow$ | 4    | 1      | 3      | 1 <sup>-</sup> | 4224.3597        | 0.0071                           |
| 6                      | 1     | 6     | 0 <sup>+</sup> | $\leftarrow$ | 5    | 1      | 5      | 1 <sup>-</sup> | 4778.6876        | 0.0030                           |
| 6                      | 0     | 6     | 0 <sup>+</sup> | $\leftarrow$ | 5    | 0      | 5      | 1 <sup>-</sup> | 4854.5989        | 0.0063                           |



| $J$                  | $K_a$ | $K_c$ | $v$            | $\leftarrow$ | $J'$ | $K_a'$ | $K_c'$ | $v'$           | $V_{\text{obs}}$ | $V_{\text{obs}}-V_{\text{calc}}$ |
|----------------------|-------|-------|----------------|--------------|------|--------|--------|----------------|------------------|----------------------------------|
| 6                    | 4     | 3     | 0 <sup>+</sup> | $\leftarrow$ | 5    | 4      | 2      | 1 <sup>-</sup> | 4950.2821        | -0.0149                          |
| 6                    | 4     | 2     | 0 <sup>+</sup> | $\leftarrow$ | 5    | 4      | 1      | 1 <sup>-</sup> | 4950.3968        | -0.0064                          |
| 6                    | 3     | 4     | 0 <sup>+</sup> | $\leftarrow$ | 5    | 3      | 3      | 1 <sup>-</sup> | 4953.5794        | -0.0059                          |
| 6                    | 3     | 3     | 0 <sup>+</sup> | $\leftarrow$ | 5    | 3      | 2      | 1 <sup>-</sup> | 4958.9186        | -0.0053                          |
| 6                    | 2     | 4     | 0 <sup>+</sup> | $\leftarrow$ | 5    | 2      | 3      | 1 <sup>-</sup> | 5015.7193        | 0.0000                           |
| 6                    | 1     | 5     | 0 <sup>+</sup> | $\leftarrow$ | 5    | 1      | 4      | 1 <sup>-</sup> | 5060.2667        | 0.0015                           |
| 7                    | 1     | 7     | 0 <sup>+</sup> | $\leftarrow$ | 6    | 1      | 6      | 1 <sup>-</sup> | 5567.5095        | 0.0052                           |
| 7                    | 0     | 7     | 0 <sup>+</sup> | $\leftarrow$ | 6    | 0      | 6      | 1 <sup>-</sup> | 5635.0544        | 0.0049                           |
| 7                    | 2     | 6     | 0 <sup>+</sup> | $\leftarrow$ | 6    | 2      | 5      | 1 <sup>-</sup> | 5743.8337        | 0.0004                           |
| 7                    | 5     | 3     | 0 <sup>+</sup> | $\leftarrow$ | 6    | 5      | 2      | 1 <sup>-</sup> | 5774.1780        | -0.0086                          |
| 7                    | 5     | 2     | 0 <sup>+</sup> | $\leftarrow$ | 6    | 5      | 1      | 1 <sup>-</sup> | 5774.1780        | -0.0086                          |
| 7                    | 4     | 4     | 0 <sup>+</sup> | $\leftarrow$ | 6    | 4      | 3      | 1 <sup>-</sup> | 5778.0488        | -0.0045                          |
| 7                    | 4     | 3     | 0 <sup>+</sup> | $\leftarrow$ | 6    | 4      | 2      | 1 <sup>-</sup> | 5778.3929        | -0.0007                          |
| 7                    | 3     | 5     | 0 <sup>+</sup> | $\leftarrow$ | 6    | 3      | 4      | 1 <sup>-</sup> | 5781.6935        | 0.0025                           |
| 7                    | 3     | 4     | 0 <sup>+</sup> | $\leftarrow$ | 6    | 3      | 3      | 1 <sup>-</sup> | 5793.5386        | 0.0006                           |
| 7                    | 2     | 5     | 0 <sup>+</sup> | $\leftarrow$ | 6    | 2      | 4      | 1 <sup>-</sup> | 5873.3398        | -0.0046                          |
| 7                    | 1     | 6     | 0 <sup>+</sup> | $\leftarrow$ | 6    | 1      | 5      | 1 <sup>-</sup> | 5890.3726        | 0.0042                           |
| 8                    | 1     | 8     | 0 <sup>+</sup> | $\leftarrow$ | 7    | 1      | 7      | $v$            | 6353.8166        | 0.0075                           |
| 8                    | 0     | 8     | 0 <sup>+</sup> | $\leftarrow$ | 7    | 0      | 7      | 1 <sup>-</sup> | 6409.7285        | 0.0072                           |
| 8                    | 2     | 7     | 0 <sup>+</sup> | $\leftarrow$ | 7    | 2      | 6      | 1 <sup>-</sup> | 6555.5178        | -0.0043                          |
| 8                    | 6     | 3     | 0 <sup>+</sup> | $\leftarrow$ | 7    | 6      | 2      | 1 <sup>-</sup> | 6598.1120        | 0.0042                           |
| 8                    | 6     | 2     | 0 <sup>+</sup> | $\leftarrow$ | 7    | 6      | 1      | 1 <sup>-</sup> | 6598.1120        | 0.0042                           |
| 8                    | 4     | 5     | 0 <sup>+</sup> | $\leftarrow$ | 7    | 4      | 4      | 1 <sup>-</sup> | 6606.8904        | 0.0016                           |
| 8                    | 4     | 4     | 0 <sup>+</sup> | $\leftarrow$ | 7    | 4      | 3      | 1 <sup>-</sup> | 6607.8247        | 0.0062                           |
| 8                    | 3     | 6     | 0 <sup>+</sup> | $\leftarrow$ | 7    | 3      | 5      | 1 <sup>-</sup> | 6609.8679        | -0.0067                          |
| 8                    | 3     | 5     | 0 <sup>+</sup> | $\leftarrow$ | 7    | 3      | 4      | 1 <sup>-</sup> | 6633.0568        | -0.0018                          |
| 8                    | 1     | 7     | 0 <sup>+</sup> | $\leftarrow$ | 7    | 1      | 6      | 1 <sup>-</sup> | 6713.0774        | -0.0055                          |
| 8                    | 2     | 6     | 0 <sup>+</sup> | $\leftarrow$ | 7    | 2      | 5      | 1 <sup>-</sup> | 6733.2583        | -0.0068                          |
| 9                    | 1     | 9     | 0 <sup>+</sup> | $\leftarrow$ | 8    | 1      | 8      | 1 <sup>-</sup> | 7137.8073        | -0.0006                          |
| 9                    | 0     | 9     | 0 <sup>+</sup> | $\leftarrow$ | 8    | 0      | 8      | 1 <sup>-</sup> | 7181.3597        | -0.0100                          |
| 9                    | 2     | 8     | 0 <sup>+</sup> | $\leftarrow$ | 8    | 2      | 7      | 1 <sup>-</sup> | 7363.8179        | -0.0121                          |
| 9                    | 6     | 4     | 0 <sup>+</sup> | $\leftarrow$ | 8    | 6      | 3      | 1 <sup>-</sup> | 7424.8514        | -0.0084                          |
| 9                    | 6     | 3     | 0 <sup>+</sup> | $\leftarrow$ | 8    | 6      | 2      | 1 <sup>-</sup> | 7424.8514        | -0.0084                          |
| 9                    | 5     | 5     | 0 <sup>+</sup> | $\leftarrow$ | 8    | 5      | 4      | 1 <sup>-</sup> | 7429.4089        | 0.0130                           |
| 9                    | 5     | 4     | 0 <sup>+</sup> | $\leftarrow$ | 8    | 5      | 3      | 1 <sup>-</sup> | 7429.4089        | 0.0130                           |
| 9                    | 4     | 6     | 0 <sup>+</sup> | $\leftarrow$ | 8    | 4      | 5      | 1 <sup>-</sup> | 7436.8243        | -0.0044                          |
| 9                    | 3     | 7     | 0 <sup>+</sup> | $\leftarrow$ | 8    | 3      | 6      | 1 <sup>-</sup> | 7437.5666        | -0.0025                          |
| 9                    | 4     | 5     | 0 <sup>+</sup> | $\leftarrow$ | 8    | 4      | 4      | 1 <sup>-</sup> | 7439.0534        | 0.0142                           |
| 9                    | 3     | 6     | 0 <sup>+</sup> | $\leftarrow$ | 8    | 3      | 5      | 1 <sup>-</sup> | 7478.7193        | 0.0143                           |
| 9                    | 1     | 8     | 0 <sup>+</sup> | $\leftarrow$ | 8    | 1      | 7      | 1 <sup>-</sup> | 7526.8048        | 0.0000                           |
| 9                    | 2     | 7     | 0 <sup>+</sup> | $\leftarrow$ | 8    | 2      | 6      | 1 <sup>-</sup> | 7592.0829        | 0.0193                           |
| 10                   | 1     | 10    | 0 <sup>+</sup> | $\leftarrow$ | 9    | 1      | 9      | 1 <sup>-</sup> | 7919.8208        | -0.0041                          |
| 10                   | 0     | 10    | 0 <sup>+</sup> | $\leftarrow$ | 9    | 0      | 9      | 1 <sup>-</sup> | 7952.1484        | -0.0009                          |
| $1^- \leftarrow 0^+$ |       |       |                |              |      |        |        |                |                  |                                  |
| 3                    | 1     | 3     | 1 <sup>-</sup> | $\leftarrow$ | 2    | 1      | 2      | 0 <sup>-</sup> | 2397.5765        | 0.0061                           |
| 3                    | 0     | 3     | 1 <sup>-</sup> | $\leftarrow$ | 2    | 0      | 2      | 0 <sup>-</sup> | 2460.0542        | 0.0068                           |
| 3                    | 1     | 2     | 1 <sup>-</sup> | $\leftarrow$ | 2    | 1      | 1      | 0 <sup>-</sup> | 2540.7219        | -0.0041                          |
| 4                    | 1     | 4     | 1 <sup>-</sup> | $\leftarrow$ | 3    | 1      | 3      | 0 <sup>-</sup> | 3193.6988        | 0.0002                           |
| 4                    | 0     | 4     | 1 <sup>-</sup> | $\leftarrow$ | 3    | 0      | 3      | 0 <sup>-</sup> | 3267.7119        | -0.0025                          |
| 4                    | 2     | 3     | 1 <sup>-</sup> | $\leftarrow$ | 3    | 2      | 2      | 0 <sup>-</sup> | 3292.2198        | 0.0017                           |
| 4                    | 2     | 2     | 1 <sup>-</sup> | $\leftarrow$ | 3    | 2      | 1      | 0 <sup>-</sup> | 3318.8457        | -0.0053                          |
| 4                    | 1     | 3     | 1 <sup>-</sup> | $\leftarrow$ | 3    | 1      | 2      | 0 <sup>-</sup> | 3384.0846        | -0.0139                          |
| 5                    | 1     | 5     | 1 <sup>-</sup> | $\leftarrow$ | 4    | 1      | 4      | 0 <sup>-</sup> | 3987.5511        | 0.0005                           |
| 5                    | 0     | 5     | 1 <sup>-</sup> | $\leftarrow$ | 4    | 0      | 4      | 0 <sup>-</sup> | 4066.0074        | 0.0003                           |
| 5                    | 2     | 4     | 1 <sup>-</sup> | $\leftarrow$ | 4    | 2      | 3      | 0 <sup>-</sup> | 4111.7477        | -0.0106                          |
| 5                    | 3     | 3     | 1 <sup>-</sup> | $\leftarrow$ | 4    | 3      | 2      | 0 <sup>-</sup> | 4126.1547        | 0.0040                           |
| 5                    | 3     | 2     | 1 <sup>-</sup> | $\leftarrow$ | 4    | 3      | 1      | 0 <sup>-</sup> | 4128.1678        | -0.0010                          |
| 5                    | 2     | 3     | 1 <sup>-</sup> | $\leftarrow$ | 4    | 2      | 2      | 0 <sup>-</sup> | 4163.5460        | 0.0027                           |
| 5                    | 1     | 4     | 1 <sup>-</sup> | $\leftarrow$ | 4    | 1      | 3      | 0 <sup>-</sup> | 4224.2362        | -0.0110                          |

| $J$ | $K_a$ | $K_c$ | $v$            | $\leftarrow$ | $J'$                 | $K_a'$ | $K_c'$ | $v'$           | $V_{\text{obs}}$ | $V_{\text{obs}}-V_{\text{calc}}$ |
|-----|-------|-------|----------------|--------------|----------------------|--------|--------|----------------|------------------|----------------------------------|
| 6   | 1     | 6     | 1 <sup>-</sup> | $\leftarrow$ | 5                    | 1      | 5      | 0 <sup>+</sup> | 4778.9014        | 0.0009                           |
| 6   | 0     | 6     | 1 <sup>-</sup> | $\leftarrow$ | 5                    | 0      | 5      | 0 <sup>+</sup> | 4854.6774        | 0.0026                           |
| 6   | 2     | 5     | 1 <sup>-</sup> | $\leftarrow$ | 5                    | 2      | 4      | 0 <sup>+</sup> | 4929.0490        | 0.0040                           |
| 6   | 4     | 3     | 1 <sup>-</sup> | $\leftarrow$ | 5                    | 4      | 2      | 0 <sup>+</sup> | 4950.3968        | -0.0064                          |
| 6   | 4     | 2     | 1 <sup>-</sup> | $\leftarrow$ | 5                    | 4      | 1      | 0 <sup>+</sup> | 4950.4966        | -0.0159                          |
| 6   | 3     | 4     | 1 <sup>-</sup> | $\leftarrow$ | 5                    | 3      | 3      | 0 <sup>+</sup> | 4953.5794        | -0.0059                          |
| 6   | 3     | 3     | 1 <sup>-</sup> | $\leftarrow$ | 5                    | 3      | 2      | 0 <sup>+</sup> | 4958.9186        | -0.0053                          |
| 6   | 2     | 4     | 1 <sup>-</sup> | $\leftarrow$ | 5                    | 2      | 3      | 0 <sup>+</sup> | 5015.6017        | -0.0029                          |
| 6   | 1     | 5     | 1 <sup>-</sup> | $\leftarrow$ | 5                    | 1      | 4      | 0 <sup>+</sup> | 5060.0042        | -0.0078                          |
| 7   | 1     | 7     | 1 <sup>-</sup> | $\leftarrow$ | 6                    | 1      | 6      | 0 <sup>+</sup> | 5567.6622        | -0.0012                          |
| 7   | 0     | 7     | 1 <sup>-</sup> | $\leftarrow$ | 6                    | 0      | 6      | 0 <sup>+</sup> | 5635.0544        | 0.0049                           |
| 7   | 2     | 6     | 1 <sup>-</sup> | $\leftarrow$ | 6                    | 2      | 5      | 0 <sup>+</sup> | 5743.6652        | -0.0059                          |
| 7   | 5     | 3     | 1 <sup>-</sup> | $\leftarrow$ | 6                    | 5      | 2      | 0 <sup>+</sup> | 5774.1780        | -0.0086                          |
| 7   | 5     | 2     | 1 <sup>-</sup> | $\leftarrow$ | 6                    | 5      | 1      | 0 <sup>+</sup> | 5774.1780        | -0.0086                          |
| 7   | 4     | 4     | 1 <sup>-</sup> | $\leftarrow$ | 6                    | 4      | 3      | 0 <sup>+</sup> | 5778.0031        | 0.0012                           |
| 7   | 4     | 3     | 1 <sup>-</sup> | $\leftarrow$ | 6                    | 4      | 2      | 0 <sup>+</sup> | 5778.3523        | 0.0097                           |
| 7   | 3     | 5     | 1 <sup>-</sup> | $\leftarrow$ | 6                    | 3      | 4      | 0 <sup>+</sup> | 5781.5614        | 0.0018                           |
| 7   | 3     | 4     | 1 <sup>-</sup> | $\leftarrow$ | 6                    | 3      | 3      | 0 <sup>+</sup> | 5793.4084        | -0.0029                          |
| 7   | 2     | 5     | 1 <sup>-</sup> | $\leftarrow$ | 6                    | 2      | 4      | 0 <sup>+</sup> | 5873.1083        | 0.0058                           |
| 7   | 1     | 6     | 1 <sup>-</sup> | $\leftarrow$ | 6                    | 1      | 5      | 0 <sup>+</sup> | 5890.0269        | 0.0112                           |
| 8   | 1     | 8     | 1 <sup>-</sup> | $\leftarrow$ | 7                    | 1      | 7      | 0 <sup>+</sup> | 6353.9213        | -0.0004                          |
| 8   | 0     | 8     | 1 <sup>-</sup> | $\leftarrow$ | 7                    | 0      | 7      | 0 <sup>+</sup> | 6409.7285        | 0.0072                           |
| 8   | 2     | 7     | 1 <sup>-</sup> | $\leftarrow$ | 7                    | 2      | 6      | 0 <sup>+</sup> | 6555.2643        | -0.0039                          |
| 8   | 6     | 3     | 1 <sup>-</sup> | $\leftarrow$ | 7                    | 6      | 2      | 0 <sup>+</sup> | 6598.1120        | 0.0042                           |
| 8   | 6     | 2     | 1 <sup>-</sup> | $\leftarrow$ | 7                    | 6      | 1      | 0 <sup>+</sup> | 6598.1120        | 0.0042                           |
| 8   | 4     | 5     | 1 <sup>-</sup> | $\leftarrow$ | 7                    | 4      | 4      | 0 <sup>+</sup> | 6606.7218        | 0.0068                           |
| 8   | 4     | 4     | 1 <sup>-</sup> | $\leftarrow$ | 7                    | 4      | 3      | 0 <sup>+</sup> | 6607.6506        | 0.0017                           |
| 8   | 3     | 6     | 1 <sup>-</sup> | $\leftarrow$ | 7                    | 3      | 5      | 0 <sup>+</sup> | 6609.6536        | 0.0069                           |
| 8   | 3     | 5     | 1 <sup>-</sup> | $\leftarrow$ | 7                    | 3      | 4      | 0 <sup>+</sup> | 6632.8532        | 0.0089                           |
| 8   | 1     | 7     | 1 <sup>-</sup> | $\leftarrow$ | 7                    | 1      | 6      | 0 <sup>+</sup> | 6712.7061        | 0.0082                           |
| 8   | 2     | 6     | 1 <sup>-</sup> | $\leftarrow$ | 7                    | 2      | 5      | 0 <sup>+</sup> | 6732.9786        | 0.0056                           |
| 9   | 1     | 9     | 1 <sup>-</sup> | $\leftarrow$ | 8                    | 1      | 8      | 0 <sup>+</sup> | 7137.8822        | -0.0040                          |
| 9   | 0     | 9     | 1 <sup>-</sup> | $\leftarrow$ | 8                    | 0      | 8      | 0 <sup>+</sup> | 7181.4200        | 0.0125                           |
| 9   | 2     | 8     | 1 <sup>-</sup> | $\leftarrow$ | 8                    | 2      | 7      | 0 <sup>+</sup> | 7363.5293        | 0.0040                           |
| 9   | 6     | 4     | 1 <sup>-</sup> | $\leftarrow$ | 8                    | 6      | 3      | 0 <sup>+</sup> | 7424.7250        | 0.0036                           |
| 9   | 6     | 3     | 1 <sup>-</sup> | $\leftarrow$ | 8                    | 6      | 2      | 0 <sup>+</sup> | 7424.7250        | 0.0036                           |
| 9   | 5     | 5     | 1 <sup>-</sup> | $\leftarrow$ | 8                    | 5      | 4      | 0 <sup>+</sup> | 7429.1904        | -0.0092                          |
| 9   | 5     | 4     | 1 <sup>-</sup> | $\leftarrow$ | 8                    | 5      | 3      | 0 <sup>+</sup> | 7429.1904        | -0.0092                          |
| 9   | 3     | 7     | 1 <sup>-</sup> | $\leftarrow$ | 8                    | 3      | 6      | 0 <sup>+</sup> | 7437.3191        | 0.0110                           |
| 9   | 4     | 5     | 1 <sup>-</sup> | $\leftarrow$ | 8                    | 4      | 4      | 0 <sup>+</sup> | 7438.8275        | 0.0060                           |
| 9   | 3     | 6     | 1 <sup>-</sup> | $\leftarrow$ | 8                    | 3      | 5      | 0 <sup>+</sup> | 7478.4965        | -0.0069                          |
| 9   | 1     | 8     | 1 <sup>-</sup> | $\leftarrow$ | 8                    | 1      | 7      | 0 <sup>+</sup> | 7526.4525        | -0.0111                          |
| 9   | 2     | 7     | 1 <sup>-</sup> | $\leftarrow$ | 8                    | 2      | 6      | 0 <sup>+</sup> | 7591.8291        | -0.0063                          |
| 10  | 1     | 10    | 1 <sup>-</sup> | $\leftarrow$ | 9                    | 1      | 9      | 0 <sup>+</sup> | 7919.8208        | -0.0041                          |
| 10  | 0     | 10    | 1 <sup>-</sup> | $\leftarrow$ | 9                    | 0      | 9      | 0 <sup>+</sup> | 7952.1964        | 0.0073                           |
|     |       |       |                |              | $0^- \leftarrow 1^+$ |        |        |                |                  |                                  |
| 3   | 1     | 2     | 0 <sup>-</sup> | $\leftarrow$ | 2                    | 1      | 1      | 1 <sup>+</sup> | 2540.4869        | -0.0054                          |
| 4   | 0     | 4     | 0 <sup>-</sup> | $\leftarrow$ | 3                    | 0      | 3      | 1 <sup>+</sup> | 3267.4857        | -0.0017                          |
| 4   | 2     | 3     | 0 <sup>-</sup> | $\leftarrow$ | 3                    | 2      | 2      | 1 <sup>+</sup> | 3291.9789        | 0.0043                           |
| 4   | 2     | 2     | 0 <sup>-</sup> | $\leftarrow$ | 3                    | 2      | 1      | 1 <sup>+</sup> | 3318.6245        | -0.0083                          |
| 4   | 1     | 3     | 0 <sup>-</sup> | $\leftarrow$ | 3                    | 1      | 2      | 1 <sup>+</sup> | 3384.0393        | 0.0066                           |
| 5   | 1     | 5     | 0 <sup>-</sup> | $\leftarrow$ | 4                    | 1      | 4      | 1 <sup>+</sup> | 3987.2665        | -0.0045                          |
| 5   | 0     | 5     | 0 <sup>-</sup> | $\leftarrow$ | 4                    | 0      | 4      | 1 <sup>+</sup> | 4065.8703        | -0.0071                          |
| 5   | 2     | 4     | 0 <sup>-</sup> | $\leftarrow$ | 4                    | 2      | 3      | 1 <sup>+</sup> | 4111.6622        | 0.0046                           |
| 5   | 3     | 3     | 0 <sup>-</sup> | $\leftarrow$ | 4                    | 3      | 2      | 1 <sup>+</sup> | 4125.9813        | 0.0005                           |
| 5   | 3     | 2     | 0 <sup>-</sup> | $\leftarrow$ | 4                    | 3      | 1      | 1 <sup>+</sup> | 4127.9993        | 0.0001                           |
| 5   | 2     | 3     | 0 <sup>-</sup> | $\leftarrow$ | 4                    | 2      | 2      | 1 <sup>+</sup> | 4163.5460        | 0.0027                           |
| 5   | 1     | 4     | 0 <sup>-</sup> | $\leftarrow$ | 4                    | 1      | 3      | 1 <sup>+</sup> | 4224.3597        | 0.0071                           |
| 6   | 1     | 6     | 0 <sup>-</sup> | $\leftarrow$ | 5                    | 1      | 5      | 1 <sup>+</sup> | 4778.6876        | 0.0030                           |

| $J$ | $K_a$ | $K_c$ | $v$            | $\leftarrow$ | $J'$                 | $K_a'$ | $K_c'$ | $v'$           | $V_{\text{obs}}$ | $V_{\text{obs}}-V_{\text{calc}}$ |
|-----|-------|-------|----------------|--------------|----------------------|--------|--------|----------------|------------------|----------------------------------|
| 6   | 0     | 6     | 0 <sup>-</sup> | $\leftarrow$ | 5                    | 0      | 5      | 1 <sup>+</sup> | 4854.5989        | 0.0063                           |
| 6   | 4     | 3     | 0 <sup>-</sup> | $\leftarrow$ | 5                    | 4      | 2      | 1 <sup>+</sup> | 4950.2821        | -0.0149                          |
| 6   | 4     | 2     | 0 <sup>-</sup> | $\leftarrow$ | 5                    | 4      | 1      | 1 <sup>+</sup> | 4950.3968        | -0.0064                          |
| 6   | 3     | 4     | 0 <sup>-</sup> | $\leftarrow$ | 5                    | 3      | 3      | 1 <sup>+</sup> | 4953.5794        | -0.0059                          |
| 6   | 3     | 3     | 0 <sup>-</sup> | $\leftarrow$ | 5                    | 3      | 2      | 1 <sup>+</sup> | 4958.9186        | -0.0053                          |
| 6   | 2     | 4     | 0 <sup>-</sup> | $\leftarrow$ | 5                    | 2      | 3      | 1 <sup>+</sup> | 5015.7193        | 0.0000                           |
| 6   | 1     | 5     | 0 <sup>-</sup> | $\leftarrow$ | 5                    | 1      | 4      | 1 <sup>+</sup> | 5060.2667        | 0.0015                           |
| 7   | 1     | 7     | 0 <sup>-</sup> | $\leftarrow$ | 6                    | 1      | 6      | 1 <sup>+</sup> | 5567.5095        | 0.0052                           |
| 7   | 0     | 7     | 0 <sup>-</sup> | $\leftarrow$ | 6                    | 0      | 6      | 1 <sup>+</sup> | 5635.0544        | 0.0049                           |
| 7   | 2     | 6     | 0 <sup>-</sup> | $\leftarrow$ | 6                    | 2      | 5      | 1 <sup>+</sup> | 5743.8337        | 0.0004                           |
| 7   | 5     | 3     | 0 <sup>-</sup> | $\leftarrow$ | 6                    | 5      | 2      | 1 <sup>+</sup> | 5774.1780        | -0.0086                          |
| 7   | 5     | 2     | 0 <sup>-</sup> | $\leftarrow$ | 6                    | 5      | 1      | 1 <sup>+</sup> | 5774.1780        | -0.0086                          |
| 7   | 4     | 4     | 0 <sup>-</sup> | $\leftarrow$ | 6                    | 4      | 3      | 1 <sup>+</sup> | 5778.0488        | -0.0045                          |
| 7   | 4     | 3     | 0 <sup>-</sup> | $\leftarrow$ | 6                    | 4      | 2      | 1 <sup>+</sup> | 5778.3929        | -0.0007                          |
| 7   | 3     | 5     | 0 <sup>-</sup> | $\leftarrow$ | 6                    | 3      | 4      | 1 <sup>+</sup> | 5781.6935        | 0.0025                           |
| 7   | 3     | 4     | 0 <sup>-</sup> | $\leftarrow$ | 6                    | 3      | 3      | 1 <sup>+</sup> | 5793.5386        | 0.0006                           |
| 7   | 2     | 5     | 0 <sup>-</sup> | $\leftarrow$ | 6                    | 2      | 4      | 1 <sup>+</sup> | 5873.3398        | -0.0046                          |
| 7   | 1     | 6     | 0 <sup>-</sup> | $\leftarrow$ | 6                    | 1      | 5      | 1 <sup>+</sup> | 5890.3726        | 0.0042                           |
| 8   | 1     | 8     | 0 <sup>-</sup> | $\leftarrow$ | 7                    | 1      | 7      | 1 <sup>+</sup> | 6353.8166        | 0.0075                           |
| 8   | 0     | 8     | 0 <sup>-</sup> | $\leftarrow$ | 7                    | 0      | 7      | 1 <sup>+</sup> | 6409.7285        | 0.0072                           |
| 8   | 2     | 7     | 0 <sup>-</sup> | $\leftarrow$ | 7                    | 2      | 6      | 1 <sup>+</sup> | 6555.5178        | -0.0043                          |
| 8   | 6     | 3     | 0 <sup>-</sup> | $\leftarrow$ | 7                    | 6      | 2      | 1 <sup>+</sup> | 6598.1120        | 0.0042                           |
| 8   | 6     | 2     | 0 <sup>-</sup> | $\leftarrow$ | 7                    | 6      | 1      | 1 <sup>+</sup> | 6598.1120        | 0.0042                           |
| 8   | 4     | 5     | 0 <sup>-</sup> | $\leftarrow$ | 7                    | 4      | 4      | 1 <sup>+</sup> | 6606.8904        | 0.0016                           |
| 8   | 4     | 4     | 0 <sup>-</sup> | $\leftarrow$ | 7                    | 4      | 3      | 1 <sup>+</sup> | 6607.8247        | 0.0062                           |
| 8   | 3     | 6     | 0 <sup>-</sup> | $\leftarrow$ | 7                    | 3      | 5      | 1 <sup>+</sup> | 6609.8679        | -0.0067                          |
| 8   | 3     | 5     | 0 <sup>-</sup> | $\leftarrow$ | 7                    | 3      | 4      | 1 <sup>+</sup> | 6633.0568        | -0.0018                          |
| 8   | 1     | 7     | 0 <sup>-</sup> | $\leftarrow$ | 7                    | 1      | 6      | 1 <sup>+</sup> | 6713.0774        | -0.0055                          |
| 8   | 2     | 6     | 0 <sup>-</sup> | $\leftarrow$ | 7                    | 2      | 5      | 1 <sup>+</sup> | 6733.2583        | -0.0068                          |
| 9   | 1     | 9     | 0 <sup>-</sup> | $\leftarrow$ | 8                    | 1      | 8      | 1 <sup>+</sup> | 7137.8073        | -0.0006                          |
| 9   | 0     | 9     | 0 <sup>-</sup> | $\leftarrow$ | 8                    | 0      | 8      | 1 <sup>+</sup> | 7181.3589        | -0.0180                          |
| 9   | 2     | 8     | 0 <sup>-</sup> | $\leftarrow$ | 8                    | 2      | 7      | 1 <sup>+</sup> | 7363.8179        | -0.0121                          |
| 9   | 6     | 4     | 0 <sup>-</sup> | $\leftarrow$ | 8                    | 6      | 3      | 1 <sup>+</sup> | 7424.8514        | -0.0084                          |
| 9   | 6     | 3     | 0 <sup>-</sup> | $\leftarrow$ | 8                    | 6      | 2      | 1 <sup>+</sup> | 7424.8514        | -0.0084                          |
| 9   | 5     | 5     | 0 <sup>-</sup> | $\leftarrow$ | 8                    | 5      | 4      | 1 <sup>+</sup> | 7429.4089        | 0.0130                           |
| 9   | 5     | 4     | 0 <sup>-</sup> | $\leftarrow$ | 8                    | 5      | 3      | 1 <sup>+</sup> | 7429.4089        | 0.0130                           |
| 9   | 4     | 6     | 0 <sup>-</sup> | $\leftarrow$ | 8                    | 4      | 5      | 1 <sup>+</sup> | 7436.8243        | -0.0044                          |
| 9   | 3     | 7     | 0 <sup>-</sup> | $\leftarrow$ | 8                    | 3      | 6      | 1 <sup>+</sup> | 7437.5666        | -0.0025                          |
| 9   | 4     | 5     | 0 <sup>-</sup> | $\leftarrow$ | 8                    | 4      | 4      | 1 <sup>+</sup> | 7439.0534        | 0.0142                           |
| 9   | 3     | 6     | 0 <sup>-</sup> | $\leftarrow$ | 8                    | 3      | 5      | 1 <sup>+</sup> | 7478.7193        | 0.0143                           |
| 9   | 1     | 8     | 0 <sup>-</sup> | $\leftarrow$ | 8                    | 1      | 7      | 1 <sup>+</sup> | 7526.8048        | 0.0000                           |
| 9   | 2     | 7     | 0 <sup>-</sup> | $\leftarrow$ | 8                    | 2      | 6      | 1 <sup>+</sup> | 7592.0829        | 0.0193                           |
| 10  | 1     | 10    | 0 <sup>-</sup> | $\leftarrow$ | 9                    | 1      | 9      | 1 <sup>+</sup> | 7919.8208        | -0.0041                          |
| 10  | 0     | 10    | 0 <sup>-</sup> | $\leftarrow$ | 9                    | 0      | 9      | 1 <sup>+</sup> | 7952.1484        | -0.0009                          |
|     |       |       |                |              | $1^+ \leftarrow 0^-$ |        |        |                |                  |                                  |
| 3   | 1     | 2     | 1 <sup>+</sup> | $\leftarrow$ | 2                    | 1      | 1      | 0 <sup>-</sup> | 2540.7219        | -0.0041                          |
| 4   | 0     | 4     | 1 <sup>+</sup> | $\leftarrow$ | 3                    | 0      | 3      | 0 <sup>-</sup> | 3267.7119        | 0.0025                           |
| 4   | 2     | 3     | 1 <sup>+</sup> | $\leftarrow$ | 3                    | 2      | 2      | 0 <sup>-</sup> | 3292.2198        | 0.0017                           |
| 4   | 2     | 2     | 1 <sup>+</sup> | $\leftarrow$ | 3                    | 2      | 1      | 0 <sup>-</sup> | 3318.8457        | -0.0053                          |
| 4   | 1     | 3     | 1 <sup>+</sup> | $\leftarrow$ | 3                    | 1      | 2      | 0 <sup>-</sup> | 3384.0846        | -0.0139                          |
| 5   | 1     | 5     | 1 <sup>+</sup> | $\leftarrow$ | 4                    | 1      | 4      | 0 <sup>-</sup> | 3987.5511        | 0.0005                           |
| 5   | 0     | 5     | 1 <sup>+</sup> | $\leftarrow$ | 4                    | 0      | 4      | 0 <sup>-</sup> | 4066.0074        | 0.0003                           |
| 5   | 2     | 4     | 1 <sup>+</sup> | $\leftarrow$ | 4                    | 2      | 3      | 0 <sup>-</sup> | 4111.7477        | -0.0106                          |
| 5   | 3     | 3     | 1 <sup>+</sup> | $\leftarrow$ | 4                    | 3      | 2      | 0 <sup>-</sup> | 4126.1547        | 0.0040                           |
| 5   | 3     | 2     | 1 <sup>+</sup> | $\leftarrow$ | 4                    | 3      | 1      | 0 <sup>-</sup> | 4128.1678        | -0.0010                          |
| 5   | 2     | 3     | 1 <sup>+</sup> | $\leftarrow$ | 4                    | 2      | 2      | 0 <sup>-</sup> | 4163.5460        | 0.0027                           |
| 5   | 1     | 4     | 1 <sup>+</sup> | $\leftarrow$ | 4                    | 1      | 3      | 0 <sup>-</sup> | 4224.2362        | -0.0110                          |
| 6   | 1     | 6     | 1 <sup>+</sup> | $\leftarrow$ | 5                    | 1      | 5      | 0 <sup>-</sup> | 4778.9014        | 0.0009                           |
| 6   | 0     | 6     | 1 <sup>+</sup> | $\leftarrow$ | 5                    | 0      | 5      | 0 <sup>-</sup> | 4854.6774        | 0.0026                           |

| $J$ | $K_a$ | $K_c$ | $v$            | $\leftarrow$ | $J'$ | $K_a'$ | $K_c'$ | $v'$           | $V_{\text{obs}}$ | $V_{\text{obs}}-V_{\text{calc}}$ |
|-----|-------|-------|----------------|--------------|------|--------|--------|----------------|------------------|----------------------------------|
| 6   | 2     | 5     | 1 <sup>+</sup> | $\leftarrow$ | 5    | 2      | 4      | 0 <sup>-</sup> | 4929.0490        | 0.0040                           |
| 6   | 4     | 3     | 1 <sup>+</sup> | $\leftarrow$ | 5    | 4      | 2      | 0 <sup>-</sup> | 4950.3970        | -0.0120                          |
| 6   | 4     | 2     | 1 <sup>+</sup> | $\leftarrow$ | 5    | 4      | 1      | 0 <sup>-</sup> | 4950.4966        | -0.0159                          |
| 6   | 3     | 4     | 1 <sup>+</sup> | $\leftarrow$ | 5    | 3      | 3      | 0 <sup>-</sup> | 4953.5794        | -0.0059                          |
| 6   | 3     | 3     | 1 <sup>+</sup> | $\leftarrow$ | 5    | 3      | 2      | 0 <sup>-</sup> | 4958.9186        | -0.0053                          |
| 6   | 2     | 4     | 1 <sup>+</sup> | $\leftarrow$ | 5    | 2      | 3      | 0 <sup>-</sup> | 5015.6017        | -0.0029                          |
| 6   | 1     | 5     | 1 <sup>+</sup> | $\leftarrow$ | 5    | 1      | 4      | 0 <sup>-</sup> | 5060.0042        | -0.0078                          |
| 7   | 1     | 7     | 1 <sup>+</sup> | $\leftarrow$ | 6    | 1      | 6      | 0 <sup>-</sup> | 5567.6622        | -0.0012                          |
| 7   | 0     | 7     | 1 <sup>+</sup> | $\leftarrow$ | 6    | 0      | 6      | 0 <sup>-</sup> | 5635.0544        | 0.0049                           |
| 7   | 2     | 6     | 1 <sup>+</sup> | $\leftarrow$ | 6    | 2      | 5      | 0 <sup>-</sup> | 5743.6652        | -0.0059                          |
| 7   | 5     | 2     | 1 <sup>+</sup> | $\leftarrow$ | 6    | 5      | 1      | 0 <sup>-</sup> | 5774.1780        | -0.0086                          |
| 7   | 4     | 4     | 1 <sup>+</sup> | $\leftarrow$ | 6    | 4      | 3      | 0 <sup>-</sup> | 5778.0031        | 0.0012                           |
| 7   | 4     | 3     | 1 <sup>+</sup> | $\leftarrow$ | 6    | 4      | 2      | 0 <sup>-</sup> | 5778.3523        | 0.0097                           |
| 7   | 3     | 5     | 1 <sup>+</sup> | $\leftarrow$ | 6    | 3      | 4      | 0 <sup>-</sup> | 5781.5614        | 0.0018                           |
| 7   | 3     | 4     | 1 <sup>+</sup> | $\leftarrow$ | 6    | 3      | 3      | 0 <sup>-</sup> | 5793.4084        | -0.0029                          |
| 7   | 2     | 5     | 1 <sup>+</sup> | $\leftarrow$ | 6    | 2      | 4      | 0 <sup>-</sup> | 5873.1083        | 0.0058                           |
| 7   | 1     | 6     | 1 <sup>+</sup> | $\leftarrow$ | 6    | 1      | 5      | 0 <sup>-</sup> | 5890.0269        | 0.0112                           |
| 8   | 1     | 8     | 1 <sup>+</sup> | $\leftarrow$ | 7    | 1      | 7      | 0 <sup>-</sup> | 6353.9213        | -0.0004                          |
| 8   | 0     | 8     | 1 <sup>+</sup> | $\leftarrow$ | 7    | 0      | 7      | 0 <sup>-</sup> | 6409.7285        | 0.0072                           |
| 8   | 2     | 7     | 1 <sup>+</sup> | $\leftarrow$ | 7    | 2      | 6      | 0 <sup>-</sup> | 6555.2643        | -0.0039                          |
| 8   | 6     | 3     | 1 <sup>+</sup> | $\leftarrow$ | 7    | 6      | 2      | 0 <sup>-</sup> | 6598.1120        | 0.0042                           |
| 8   | 6     | 2     | 1 <sup>+</sup> | $\leftarrow$ | 7    | 6      | 1      | 0 <sup>-</sup> | 6598.1120        | 0.0042                           |
| 8   | 4     | 5     | 1 <sup>+</sup> | $\leftarrow$ | 7    | 4      | 4      | 0 <sup>-</sup> | 6606.7220        | 0.0020                           |
| 8   | 4     | 4     | 1 <sup>+</sup> | $\leftarrow$ | 7    | 4      | 3      | 0 <sup>-</sup> | 6607.6506        | 0.0017                           |
| 8   | 3     | 6     | 1 <sup>+</sup> | $\leftarrow$ | 7    | 3      | 5      | 0 <sup>-</sup> | 6609.6536        | 0.0069                           |
| 8   | 3     | 5     | 1 <sup>+</sup> | $\leftarrow$ | 7    | 3      | 4      | 0 <sup>-</sup> | 6632.8530        | -0.0038                          |
| 8   | 1     | 7     | 1 <sup>+</sup> | $\leftarrow$ | 7    | 1      | 6      | 0 <sup>-</sup> | 6712.7061        | 0.0082                           |
| 8   | 2     | 6     | 1 <sup>+</sup> | $\leftarrow$ | 7    | 2      | 5      | 0 <sup>-</sup> | 6732.9786        | 0.0056                           |
| 9   | 1     | 9     | 1 <sup>+</sup> | $\leftarrow$ | 8    | 1      | 8      | 0 <sup>-</sup> | 7137.8822        | -0.0040                          |
| 9   | 0     | 9     | 1 <sup>+</sup> | $\leftarrow$ | 8    | 0      | 8      | 0 <sup>-</sup> | 7181.4200        | 0.0125                           |
| 9   | 2     | 8     | 1 <sup>+</sup> | $\leftarrow$ | 8    | 2      | 7      | 0 <sup>-</sup> | 7363.5293        | 0.0040                           |
| 9   | 6     | 3     | 1 <sup>+</sup> | $\leftarrow$ | 8    | 6      | 2      | 0 <sup>-</sup> | 7424.7250        | 0.0036                           |
| 9   | 6     | 4     | 1 <sup>+</sup> | $\leftarrow$ | 8    | 6      | 3      | 0 <sup>-</sup> | 7424.7250        | 0.0036                           |
| 9   | 5     | 5     | 1 <sup>+</sup> | $\leftarrow$ | 8    | 5      | 4      | 0 <sup>-</sup> | 7429.1904        | -0.0092                          |
| 9   | 5     | 4     | 1 <sup>+</sup> | $\leftarrow$ | 8    | 5      | 3      | 0 <sup>-</sup> | 7429.1904        | -0.0092                          |
| 9   | 4     | 6     | 1 <sup>+</sup> | $\leftarrow$ | 8    | 4      | 5      | 0 <sup>-</sup> | 7436.6092        | -0.0016                          |
| 9   | 3     | 7     | 1 <sup>+</sup> | $\leftarrow$ | 8    | 3      | 6      | 0 <sup>-</sup> | 7437.3191        | 0.0110                           |
| 9   | 4     | 5     | 1 <sup>+</sup> | $\leftarrow$ | 8    | 4      | 4      | 0 <sup>-</sup> | 7438.8275        | 0.0060                           |
| 9   | 3     | 6     | 1 <sup>+</sup> | $\leftarrow$ | 8    | 3      | 5      | 0 <sup>-</sup> | 7478.4965        | -0.0069                          |
| 9   | 1     | 8     | 1 <sup>+</sup> | $\leftarrow$ | 8    | 1      | 7      | 0 <sup>-</sup> | 7526.4525        | -0.0111                          |
| 9   | 2     | 7     | 1 <sup>+</sup> | $\leftarrow$ | 8    | 2      | 6      | 0 <sup>-</sup> | 7591.8291        | -0.0063                          |
| 10  | 1     | 10    | 1 <sup>+</sup> | $\leftarrow$ | 9    | 1      | 9      | 0 <sup>-</sup> | 7919.8208        | -0.0041                          |
| 10  | 0     | 10    | 1 <sup>+</sup> | $\leftarrow$ | 9    | 0      | 9      | 0 <sup>-</sup> | 7952.1964        | 0.0073                           |

**<sup>c</sup>R-branch**

**0<sup>+</sup> ← 0<sup>+</sup>**

|   |   |   |                |              |   |   |   |                |           |         |
|---|---|---|----------------|--------------|---|---|---|----------------|-----------|---------|
| 2 | 1 | 1 | 0 <sup>+</sup> | $\leftarrow$ | 1 | 0 | 1 | 0 <sup>+</sup> | 2348.7551 | -0.0143 |
| 6 | 1 | 6 | 0 <sup>+</sup> | $\leftarrow$ | 5 | 2 | 4 | 0 <sup>+</sup> | 2521.1163 | -0.0063 |
| 3 | 1 | 2 | 0 <sup>+</sup> | $\leftarrow$ | 2 | 0 | 2 | 0 <sup>+</sup> | 3244.9707 | -0.0003 |
| 2 | 2 | 0 | 0 <sup>+</sup> | $\leftarrow$ | 1 | 1 | 0 | 0 <sup>+</sup> | 3515.7611 | -0.0013 |
| 4 | 1 | 3 | 0 <sup>+</sup> | $\leftarrow$ | 3 | 0 | 3 | 0 <sup>+</sup> | 4169.1746 | 0.0088  |
| 7 | 1 | 6 | 0 <sup>+</sup> | $\leftarrow$ | 6 | 2 | 4 | 0 <sup>+</sup> | 4299.0808 | 0.0015  |
| 3 | 2 | 1 | 0 <sup>+</sup> | $\leftarrow$ | 2 | 1 | 1 | 0 <sup>+</sup> | 4302.3199 | -0.0076 |
| 3 | 2 | 2 | 0 <sup>+</sup> | $\leftarrow$ | 2 | 1 | 2 | 0 <sup>+</sup> | 4432.1629 | 0.0106  |
| 8 | 0 | 8 | 0 <sup>+</sup> | $\leftarrow$ | 7 | 1 | 6 | 0 <sup>+</sup> | 4889.1534 | 0.0023  |
| 4 | 2 | 2 | 0 <sup>+</sup> | $\leftarrow$ | 3 | 1 | 2 | 0 <sup>+</sup> | 5080.4709 | 0.0106  |
| 5 | 1 | 4 | 0 <sup>+</sup> | $\leftarrow$ | 4 | 0 | 4 | 0 <sup>+</sup> | 5125.8766 | -0.0006 |
| 4 | 2 | 3 | 0 <sup>+</sup> | $\leftarrow$ | 3 | 1 | 3 | 0 <sup>+</sup> | 5326.9338 | 0.0114  |
| 3 | 3 | 0 | 0 <sup>+</sup> | $\leftarrow$ | 2 | 2 | 0 | 0 <sup>+</sup> | 5619.3752 | -0.0053 |
| 3 | 3 | 1 | 0 <sup>+</sup> | $\leftarrow$ | 2 | 2 | 1 | 0 <sup>+</sup> | 5621.9945 | -0.0054 |

| $J$                  | $K_a$ | $K_c$ | $v$            | $\leftarrow$ | $J'$ | $K_a'$ | $K_c'$ | $v'$           | $V_{\text{obs}}$ | $V_{\text{obs}}-V_{\text{calc}}$ |
|----------------------|-------|-------|----------------|--------------|------|--------|--------|----------------|------------------|----------------------------------|
| 5                    | 2     | 3     | 0 <sup>+</sup> | $\leftarrow$ | 4    | 1      | 3      | 0 <sup>+</sup> | 5859.9531        | 0.0150                           |
| 6                    | 1     | 5     | 0 <sup>+</sup> | $\leftarrow$ | 5    | 0      | 5      | 0 <sup>+</sup> | 6120.0810        | -0.0012                          |
| 5                    | 2     | 4     | 0 <sup>+</sup> | $\leftarrow$ | 4    | 1      | 4      | 0 <sup>+</sup> | 6245.1263        | -0.0008                          |
| 4                    | 3     | 1     | 0 <sup>+</sup> | $\leftarrow$ | 3    | 2      | 1      | 0 <sup>+</sup> | 6437.7903        | -0.0150                          |
| 4                    | 3     | 2     | 0 <sup>+</sup> | $\leftarrow$ | 3    | 2      | 2      | 0 <sup>+</sup> | 6450.6605        | -0.0053                          |
| 6                    | 2     | 4     | 0 <sup>+</sup> | $\leftarrow$ | 5    | 1      | 4      | 0 <sup>+</sup> | 6651.2984        | -0.0017                          |
| 7                    | 1     | 6     | 0 <sup>+</sup> | $\leftarrow$ | 6    | 0      | 6      | 0 <sup>+</sup> | 7155.6359        | 0.0030                           |
| 6                    | 2     | 5     | 0 <sup>+</sup> | $\leftarrow$ | 5    | 1      | 5      | 0 <sup>+</sup> | 7186.7962        | 0.0055                           |
| 5                    | 3     | 2     | 0 <sup>+</sup> | $\leftarrow$ | 4    | 2      | 2      | 0 <sup>+</sup> | 7247.1378        | -0.0221                          |
| 5                    | 3     | 3     | 0 <sup>+</sup> | $\leftarrow$ | 4    | 2      | 3      | 0 <sup>+</sup> | 7284.6206        | -0.0145                          |
| 7                    | 2     | 5     | 0 <sup>+</sup> | $\leftarrow$ | 6    | 1      | 5      | 0 <sup>+</sup> | 7464.3509        | -0.0162                          |
| 4                    | 4     | 0     | 0 <sup>+</sup> | $\leftarrow$ | 3    | 3      | 0      | 0 <sup>+</sup> | 7704.0989        | 0.0065                           |
| 4                    | 4     | 1     | 0 <sup>+</sup> | $\leftarrow$ | 3    | 3      | 1      | 0 <sup>+</sup> | 7704.1927        | 0.0064                           |
| $1^- \leftarrow 1^-$ |       |       |                |              |      |        |        |                |                  |                                  |
| 2                    | 1     | 1     | 1 <sup>-</sup> | $\leftarrow$ | 1    | 0      | 1      | 1 <sup>-</sup> | 2348.6899        | -0.0193                          |
| 6                    | 1     | 6     | 1 <sup>-</sup> | $\leftarrow$ | 5    | 2      | 4      | 1 <sup>-</sup> | 2521.1892        | 0.0016                           |
| 3                    | 1     | 2     | 1 <sup>-</sup> | $\leftarrow$ | 2    | 0      | 2      | 1 <sup>-</sup> | 3244.8503        | -0.0191                          |
| 2                    | 2     | 0     | 1 <sup>-</sup> | $\leftarrow$ | 1    | 1      | 0      | 1 <sup>-</sup> | 3515.7611        | -0.0013                          |
| 4                    | 1     | 3     | 1 <sup>-</sup> | $\leftarrow$ | 3    | 0      | 3      | 1 <sup>-</sup> | 4169.0176        | -0.0047                          |
| 7                    | 1     | 6     | 1 <sup>-</sup> | $\leftarrow$ | 6    | 2      | 4      | 1 <sup>-</sup> | 4298.9844        | 0.0026                           |
| 3                    | 2     | 1     | 1 <sup>-</sup> | $\leftarrow$ | 2    | 1      | 1      | 1 <sup>-</sup> | 4302.3199        | -0.0076                          |
| 3                    | 2     | 2     | 1 <sup>-</sup> | $\leftarrow$ | 2    | 1      | 2      | 1 <sup>-</sup> | 4432.0915        | -0.0181                          |
| 8                    | 0     | 8     | 1 <sup>-</sup> | $\leftarrow$ | 7    | 1      | 6      | 1 <sup>-</sup> | 4889.3587        | -0.0013                          |
| 4                    | 2     | 2     | 1 <sup>-</sup> | $\leftarrow$ | 3    | 1      | 2      | 1 <sup>-</sup> | 5080.4709        | 0.0106                           |
| 5                    | 1     | 4     | 1 <sup>-</sup> | $\leftarrow$ | 4    | 0      | 4      | 1 <sup>-</sup> | 5125.6867        | -0.0090                          |
| 4                    | 2     | 3     | 1 <sup>-</sup> | $\leftarrow$ | 3    | 1      | 3      | 1 <sup>-</sup> | 5326.8241        | 0.0028                           |
| 3                    | 3     | 0     | 1 <sup>-</sup> | $\leftarrow$ | 2    | 2      | 0      | 1 <sup>-</sup> | 5619.3752        | -0.0053                          |
| 3                    | 3     | 1     | 1 <sup>-</sup> | $\leftarrow$ | 2    | 2      | 1      | 1 <sup>-</sup> | 5621.9945        | -0.0054                          |
| 5                    | 2     | 3     | 1 <sup>-</sup> | $\leftarrow$ | 4    | 1      | 3      | 1 <sup>-</sup> | 5859.9531        | 0.0150                           |
| 6                    | 1     | 5     | 1 <sup>-</sup> | $\leftarrow$ | 5    | 0      | 5      | 1 <sup>-</sup> | 6119.8740        | 0.0021                           |
| 5                    | 2     | 4     | 1 <sup>-</sup> | $\leftarrow$ | 4    | 1      | 4      | 1 <sup>-</sup> | 6244.9751        | -0.0108                          |
| 4                    | 3     | 1     | 1 <sup>-</sup> | $\leftarrow$ | 3    | 2      | 1      | 1 <sup>-</sup> | 6437.7903        | -0.0150                          |
| 4                    | 3     | 2     | 1 <sup>-</sup> | $\leftarrow$ | 3    | 2      | 2      | 1 <sup>-</sup> | 6450.6605        | -0.0053                          |
| 6                    | 2     | 4     | 1 <sup>-</sup> | $\leftarrow$ | 5    | 1      | 4      | 1 <sup>-</sup> | 6651.2984        | -0.0017                          |
| 7                    | 1     | 6     | 1 <sup>-</sup> | $\leftarrow$ | 6    | 0      | 6      | 1 <sup>-</sup> | 7155.4218        | 0.0116                           |
| 6                    | 2     | 5     | 1 <sup>-</sup> | $\leftarrow$ | 5    | 1      | 5      | 1 <sup>-</sup> | 7186.6131        | -0.0021                          |
| 5                    | 3     | 2     | 1 <sup>-</sup> | $\leftarrow$ | 4    | 2      | 2      | 1 <sup>-</sup> | 7247.1378        | -0.0221                          |
| 5                    | 3     | 3     | 1 <sup>-</sup> | $\leftarrow$ | 4    | 2      | 3      | 1 <sup>-</sup> | 7284.6206        | -0.0145                          |
| 7                    | 2     | 5     | 1 <sup>-</sup> | $\leftarrow$ | 6    | 1      | 5      | 1 <sup>-</sup> | 7464.3509        | -0.0162                          |
| 4                    | 4     | 0     | 1 <sup>-</sup> | $\leftarrow$ | 3    | 3      | 0      | 1 <sup>-</sup> | 7704.0989        | 0.0065                           |
| 4                    | 4     | 1     | 1 <sup>-</sup> | $\leftarrow$ | 3    | 3      | 1      | 1 <sup>-</sup> | 7704.1927        | 0.0064                           |
| $0^- \leftarrow 0^-$ |       |       |                |              |      |        |        |                |                  |                                  |
| 2                    | 1     | 1     | 0 <sup>-</sup> | $\leftarrow$ | 1    | 0      | 1      | 0 <sup>-</sup> | 2348.7551        | -0.0143                          |
| 6                    | 1     | 6     | 0 <sup>-</sup> | $\leftarrow$ | 5    | 2      | 4      | 0 <sup>-</sup> | 2521.0341        | -0.0216                          |
| 3                    | 1     | 2     | 0 <sup>-</sup> | $\leftarrow$ | 2    | 0      | 2      | 0 <sup>-</sup> | 3245.0349        | 0.0356                           |
| 2                    | 2     | 0     | 0 <sup>-</sup> | $\leftarrow$ | 1    | 1      | 0      | 0 <sup>-</sup> | 3515.7611        | -0.0013                          |
| 4                    | 1     | 3     | 0 <sup>-</sup> | $\leftarrow$ | 3    | 0      | 3      | 0 <sup>-</sup> | 4169.2373        | 0.0290                           |
| 7                    | 1     | 6     | 0 <sup>-</sup> | $\leftarrow$ | 6    | 2      | 4      | 0 <sup>-</sup> | 4299.0808        | 0.0015                           |
| 3                    | 2     | 1     | 0 <sup>-</sup> | $\leftarrow$ | 2    | 1      | 1      | 0 <sup>-</sup> | 4302.3199        | -0.0076                          |
| 3                    | 2     | 2     | 0 <sup>-</sup> | $\leftarrow$ | 2    | 1      | 2      | 0 <sup>-</sup> | 4432.2284        | 0.0322                           |
| 8                    | 0     | 8     | 0 <sup>-</sup> | $\leftarrow$ | 7    | 1      | 6      | 0 <sup>-</sup> | 4889.0506        | 0.0232                           |
| 4                    | 2     | 2     | 0 <sup>-</sup> | $\leftarrow$ | 3    | 1      | 2      | 0 <sup>-</sup> | 5080.4709        | 0.0106                           |
| 5                    | 1     | 4     | 0 <sup>-</sup> | $\leftarrow$ | 4    | 0      | 4      | 0 <sup>-</sup> | 5125.9532        | 0.0152                           |
| 4                    | 2     | 3     | 0 <sup>-</sup> | $\leftarrow$ | 3    | 1      | 3      | 0 <sup>-</sup> | 5326.9807        | 0.0207                           |
| 3                    | 3     | 0     | 0 <sup>-</sup> | $\leftarrow$ | 2    | 2      | 0      | 0 <sup>-</sup> | 5619.3752        | -0.0053                          |
| 3                    | 3     | 1     | 0 <sup>-</sup> | $\leftarrow$ | 2    | 2      | 1      | 0 <sup>-</sup> | 5621.9945        | -0.0054                          |
| 5                    | 2     | 3     | 0 <sup>-</sup> | $\leftarrow$ | 4    | 1      | 3      | 0 <sup>-</sup> | 5859.9531        | 0.0150                           |
| 6                    | 1     | 5     | 0 <sup>-</sup> | $\leftarrow$ | 5    | 0      | 5      | 0 <sup>-</sup> | 6120.1601        | -0.0057                          |
| 5                    | 2     | 4     | 0 <sup>-</sup> | $\leftarrow$ | 4    | 1      | 4      | 0 <sup>-</sup> | 6245.1821        | 0.0044                           |

| $J$                                  | $K_a$ | $K_c$ | $v$            | $\leftarrow$ | $J'$ | $K_a'$ | $K_c'$ | $v'$           | $V_{\text{obs}}$ | $V_{\text{obs}}-V_{\text{calc}}$ |
|--------------------------------------|-------|-------|----------------|--------------|------|--------|--------|----------------|------------------|----------------------------------|
| 4                                    | 3     | 1     | 0 <sup>-</sup> | $\leftarrow$ | 3    | 2      | 1      | 0 <sup>-</sup> | 6437.8359        | 0.0036                           |
| 4                                    | 3     | 2     | 0 <sup>-</sup> | $\leftarrow$ | 3    | 2      | 2      | 0 <sup>-</sup> | 6450.6605        | -0.0053                          |
| 6                                    | 2     | 4     | 0 <sup>-</sup> | $\leftarrow$ | 5    | 1      | 4      | 0 <sup>-</sup> | 6651.2984        | -0.0017                          |
| 7                                    | 1     | 6     | 0 <sup>-</sup> | $\leftarrow$ | 6    | 0      | 6      | 0 <sup>-</sup> | 7155.7161        | -0.0274                          |
| 6                                    | 2     | 5     | 0 <sup>-</sup> | $\leftarrow$ | 5    | 1      | 5      | 0 <sup>-</sup> | 7186.8476        | -0.0089                          |
| 5                                    | 3     | 2     | 0 <sup>-</sup> | $\leftarrow$ | 4    | 2      | 2      | 0 <sup>-</sup> | 7247.1844        | 0.0099                           |
| 5                                    | 3     | 3     | 0 <sup>-</sup> | $\leftarrow$ | 4    | 2      | 3      | 0 <sup>-</sup> | 7284.6206        | -0.0145                          |
| 7                                    | 2     | 5     | 0 <sup>-</sup> | $\leftarrow$ | 6    | 1      | 5      | 0 <sup>-</sup> | 7464.4086        | 0.0060                           |
| 4                                    | 4     | 0     | 0 <sup>-</sup> | $\leftarrow$ | 3    | 3      | 0      | 0 <sup>-</sup> | 7704.0989        | 0.0065                           |
| 4                                    | 4     | 1     | 0 <sup>-</sup> | $\leftarrow$ | 3    | 3      | 1      | 0 <sup>-</sup> | 7704.1927        | 0.0064                           |
| <b>1<sup>+</sup> ← 1<sup>+</sup></b> |       |       |                |              |      |        |        |                |                  |                                  |
| 2                                    | 1     | 1     | 1 <sup>+</sup> | $\leftarrow$ | 1    | 0      | 1      | 1 <sup>+</sup> | 2348.6899        | -0.0193                          |
| 6                                    | 1     | 6     | 1 <sup>+</sup> | $\leftarrow$ | 5    | 2      | 4      | 1 <sup>+</sup> | 2521.1163        | -0.0063                          |
| 3                                    | 1     | 2     | 1 <sup>+</sup> | $\leftarrow$ | 2    | 0      | 2      | 1 <sup>+</sup> | 3244.9077        | 0.0120                           |
| 2                                    | 2     | 0     | 1 <sup>+</sup> | $\leftarrow$ | 1    | 1      | 0      | 1 <sup>+</sup> | 3515.7611        | -0.0013                          |
| 4                                    | 1     | 3     | 1 <sup>+</sup> | $\leftarrow$ | 3    | 0      | 3      | 1 <sup>+</sup> | 4169.0808        | 0.0185                           |
| 7                                    | 1     | 6     | 1 <sup>+</sup> | $\leftarrow$ | 6    | 2      | 4      | 1 <sup>+</sup> | 4298.9844        | 0.0026                           |
| 3                                    | 2     | 1     | 1 <sup>+</sup> | $\leftarrow$ | 2    | 1      | 1      | 1 <sup>+</sup> | 4302.3199        | -0.0076                          |
| 3                                    | 2     | 2     | 1 <sup>+</sup> | $\leftarrow$ | 2    | 1      | 2      | 1 <sup>+</sup> | 4432.1629        | 0.0106                           |
| 8                                    | 0     | 8     | 1 <sup>+</sup> | $\leftarrow$ | 7    | 1      | 6      | 1 <sup>+</sup> | 4889.2154        | -0.0227                          |
| 4                                    | 2     | 2     | 1 <sup>+</sup> | $\leftarrow$ | 3    | 1      | 2      | 1 <sup>+</sup> | 5080.4709        | 0.0106                           |
| 5                                    | 1     | 4     | 1 <sup>+</sup> | $\leftarrow$ | 4    | 0      | 4      | 1 <sup>+</sup> | 5125.7629        | 0.0092                           |
| 4                                    | 2     | 3     | 1 <sup>+</sup> | $\leftarrow$ | 3    | 1      | 3      | 1 <sup>+</sup> | 5326.8717        | 0.0147                           |
| 3                                    | 3     | 0     | 1 <sup>+</sup> | $\leftarrow$ | 2    | 2      | 0      | 1 <sup>+</sup> | 5619.3752        | -0.0053                          |
| 3                                    | 3     | 1     | 1 <sup>+</sup> | $\leftarrow$ | 2    | 2      | 1      | 1 <sup>+</sup> | 5621.9945        | -0.0054                          |
| 5                                    | 2     | 3     | 1 <sup>+</sup> | $\leftarrow$ | 4    | 1      | 3      | 1 <sup>+</sup> | 5859.9531        | 0.0150                           |
| 6                                    | 1     | 5     | 1 <sup>+</sup> | $\leftarrow$ | 5    | 0      | 5      | 1 <sup>+</sup> | 6119.9534        | 0.0004                           |
| 5                                    | 2     | 4     | 1 <sup>+</sup> | $\leftarrow$ | 4    | 1      | 4      | 1 <sup>+</sup> | 6245.0252        | -0.0087                          |
| 4                                    | 3     | 1     | 1 <sup>+</sup> | $\leftarrow$ | 3    | 2      | 1      | 1 <sup>+</sup> | 6437.8359        | 0.0036                           |
| 4                                    | 3     | 2     | 1 <sup>+</sup> | $\leftarrow$ | 3    | 2      | 2      | 1 <sup>+</sup> | 6450.6605        | -0.0053                          |
| 6                                    | 2     | 4     | 1 <sup>+</sup> | $\leftarrow$ | 5    | 1      | 4      | 1 <sup>+</sup> | 6651.2984        | -0.0017                          |
| 7                                    | 1     | 6     | 1 <sup>+</sup> | $\leftarrow$ | 6    | 0      | 6      | 1 <sup>+</sup> | 7155.5040        | -0.0156                          |
| 6                                    | 2     | 5     | 1 <sup>+</sup> | $\leftarrow$ | 5    | 1      | 5      | 1 <sup>+</sup> | 7186.6632        | -0.0149                          |
| 5                                    | 3     | 2     | 1 <sup>+</sup> | $\leftarrow$ | 4    | 2      | 2      | 1 <sup>+</sup> | 7247.1844        | 0.0099                           |
| 5                                    | 3     | 3     | 1 <sup>+</sup> | $\leftarrow$ | 4    | 2      | 3      | 1 <sup>+</sup> | 7284.6206        | -0.0145                          |
| 7                                    | 2     | 5     | 1 <sup>+</sup> | $\leftarrow$ | 6    | 1      | 5      | 1 <sup>+</sup> | 7464.4086        | 0.0060                           |
| 4                                    | 4     | 0     | 1 <sup>+</sup> | $\leftarrow$ | 3    | 3      | 0      | 1 <sup>+</sup> | 7704.0989        | 0.0065                           |
| 4                                    | 4     | 1     | 1 <sup>+</sup> | $\leftarrow$ | 3    | 3      | 1      | 1 <sup>+</sup> | 7704.1927        | 0.0064                           |
| <b><sup>c</sup>Q-branch</b>          |       |       |                |              |      |        |        |                |                  |                                  |
| <b>0<sup>+</sup> ← 0<sup>+</sup></b> |       |       |                |              |      |        |        |                |                  |                                  |
| 7                                    | 3     | 5     | 0 <sup>+</sup> | $\leftarrow$ | 7    | 2      | 5      | 0 <sup>+</sup> | 2927.2638        | 0.0152                           |
| 5                                    | 3     | 3     | 0 <sup>+</sup> | $\leftarrow$ | 5    | 2      | 3      | 0 <sup>+</sup> | 3080.8910        | -0.0016                          |
| 9                                    | 4     | 6     | 0 <sup>+</sup> | $\leftarrow$ | 9    | 3      | 6      | 0 <sup>+</sup> | 4307.7212        | 0.0009                           |
| 8                                    | 4     | 5     | 0 <sup>+</sup> | $\leftarrow$ | 8    | 3      | 5      | 0 <sup>+</sup> | 4349.6042        | -0.0033                          |
| 7                                    | 4     | 4     | 0 <sup>+</sup> | $\leftarrow$ | 7    | 3      | 4      | 0 <sup>+</sup> | 4375.7497        | 0.0056                           |
| 6                                    | 4     | 3     | 0 <sup>+</sup> | $\leftarrow$ | 6    | 3      | 3      | 0 <sup>+</sup> | 4391.2035        | -0.0025                          |
| 8                                    | 4     | 4     | 0 <sup>+</sup> | $\leftarrow$ | 8    | 3      | 6      | 0 <sup>+</sup> | 4394.0782        | -0.0047                          |
| 9                                    | 4     | 5     | 0 <sup>+</sup> | $\leftarrow$ | 9    | 3      | 7      | 0 <sup>+</sup> | 4395.5751        | -0.0003                          |
| 7                                    | 4     | 3     | 0 <sup>+</sup> | $\leftarrow$ | 7    | 3      | 5      | 0 <sup>+</sup> | 4396.0887        | -0.0099                          |
| 6                                    | 4     | 2     | 0 <sup>+</sup> | $\leftarrow$ | 6    | 3      | 4      | 0 <sup>+</sup> | 4399.3663        | -0.0008                          |
| 5                                    | 4     | 2     | 0 <sup>+</sup> | $\leftarrow$ | 5    | 3      | 2      | 0 <sup>+</sup> | 4399.7384        | 0.0021                           |
| 5                                    | 4     | 1     | 0 <sup>+</sup> | $\leftarrow$ | 5    | 3      | 3      | 0 <sup>+</sup> | 4402.4668        | 0.0109                           |
| 8                                    | 5     | 3     | 0 <sup>+</sup> | $\leftarrow$ | 8    | 4      | 5      | 0 <sup>+</sup> | 5651.9883        | 0.0031                           |
| 7                                    | 5     | 3     | 0 <sup>+</sup> | $\leftarrow$ | 7    | 4      | 3      | 0 <sup>+</sup> | 5657.0295        | 0.0198                           |
| 7                                    | 5     | 2     | 0 <sup>+</sup> | $\leftarrow$ | 7    | 4      | 4      | 0 <sup>+</sup> | 5657.4825        | -0.0010                          |
| <b>1<sup>-</sup> ← 1<sup>-</sup></b> |       |       |                |              |      |        |        |                |                  |                                  |
| 7                                    | 3     | 5     | 1 <sup>-</sup> | $\leftarrow$ | 7    | 2      | 5      | 1 <sup>-</sup> | 2927.2638        | 0.0152                           |
| 5                                    | 3     | 3     | 1 <sup>-</sup> | $\leftarrow$ | 5    | 2      | 3      | 1 <sup>-</sup> | 3080.9560        | 0.0019                           |
| 9                                    | 4     | 6     | 1 <sup>-</sup> | $\leftarrow$ | 9    | 3      | 6      | 1 <sup>-</sup> | 4307.7212        | 0.0009                           |

| $J$                  | $K_a$ | $K_c$ | $v$            | $\leftarrow$ | $J'$ | $K_a'$ | $K_c'$ | $v'$           | $V_{\text{obs}}$ | $V_{\text{obs}}-V_{\text{calc}}$ |
|----------------------|-------|-------|----------------|--------------|------|--------|--------|----------------|------------------|----------------------------------|
| 8                    | 4     | 5     | 1 <sup>-</sup> | $\leftarrow$ | 8    | 3      | 5      | 1 <sup>-</sup> | 4349.6042        | -0.0033                          |
| 7                    | 4     | 4     | 1 <sup>-</sup> | $\leftarrow$ | 7    | 3      | 4      | 1 <sup>-</sup> | 4375.7780        | 0.0043                           |
| 6                    | 4     | 3     | 1 <sup>-</sup> | $\leftarrow$ | 6    | 3      | 3      | 1 <sup>-</sup> | 4391.2035        | -0.0025                          |
| 8                    | 4     | 4     | 1 <sup>-</sup> | $\leftarrow$ | 8    | 3      | 6      | 1 <sup>-</sup> | 4394.0782        | -0.0047                          |
| 9                    | 4     | 5     | 1 <sup>-</sup> | $\leftarrow$ | 9    | 3      | 7      | 1 <sup>-</sup> | 4395.5751        | -0.0003                          |
| 7                    | 4     | 3     | 1 <sup>-</sup> | $\leftarrow$ | 7    | 3      | 5      | 1 <sup>-</sup> | 4396.0887        | -0.0099                          |
| 6                    | 4     | 2     | 1 <sup>-</sup> | $\leftarrow$ | 6    | 3      | 4      | 1 <sup>-</sup> | 4399.3663        | -0.0008                          |
| 5                    | 4     | 2     | 1 <sup>-</sup> | $\leftarrow$ | 5    | 3      | 2      | 1 <sup>-</sup> | 4399.8050        | 0.0106                           |
| 5                    | 4     | 1     | 1 <sup>-</sup> | $\leftarrow$ | 5    | 3      | 3      | 1 <sup>-</sup> | 4402.5126        | -0.0012                          |
| 8                    | 5     | 3     | 1 <sup>-</sup> | $\leftarrow$ | 8    | 4      | 5      | 1 <sup>-</sup> | 5651.9883        | 0.0031                           |
| 7                    | 5     | 3     | 1 <sup>-</sup> | $\leftarrow$ | 7    | 4      | 3      | 1 <sup>-</sup> | 5657.0295        | 0.0198                           |
| 7                    | 5     | 2     | 1 <sup>-</sup> | $\leftarrow$ | 7    | 4      | 4      | 1 <sup>-</sup> | 5657.4825        | -0.0010                          |
| $0^- \leftarrow 0^-$ |       |       |                |              |      |        |        |                |                  |                                  |
| 7                    | 3     | 5     | 0 <sup>-</sup> | $\leftarrow$ | 7    | 2      | 5      | 0 <sup>-</sup> | 2927.2638        | 0.0152                           |
| 5                    | 3     | 3     | 0 <sup>-</sup> | $\leftarrow$ | 5    | 2      | 3      | 0 <sup>-</sup> | 3080.8910        | -0.0016                          |
| 9                    | 4     | 6     | 0 <sup>-</sup> | $\leftarrow$ | 9    | 3      | 6      | 0 <sup>-</sup> | 4307.7212        | -0.0138                          |
| 8                    | 4     | 5     | 0 <sup>-</sup> | $\leftarrow$ | 8    | 3      | 5      | 0 <sup>-</sup> | 4349.6042        | -0.0033                          |
| 7                    | 4     | 4     | 0 <sup>-</sup> | $\leftarrow$ | 7    | 3      | 4      | 0 <sup>-</sup> | 4375.7497        | 0.0056                           |
| 6                    | 4     | 3     | 0 <sup>-</sup> | $\leftarrow$ | 6    | 3      | 3      | 0 <sup>-</sup> | 4391.2035        | -0.0025                          |
| 8                    | 4     | 4     | 0 <sup>-</sup> | $\leftarrow$ | 8    | 3      | 6      | 0 <sup>-</sup> | 4394.0782        | -0.0047                          |
| 9                    | 4     | 5     | 0 <sup>-</sup> | $\leftarrow$ | 9    | 3      | 7      | 0 <sup>-</sup> | 4395.5751        | -0.0003                          |
| 7                    | 4     | 3     | 0 <sup>-</sup> | $\leftarrow$ | 7    | 3      | 5      | 0 <sup>-</sup> | 4396.1221        | 0.0010                           |
| 6                    | 4     | 2     | 0 <sup>-</sup> | $\leftarrow$ | 6    | 3      | 4      | 0 <sup>-</sup> | 4399.3663        | -0.0008                          |
| 5                    | 4     | 2     | 0 <sup>-</sup> | $\leftarrow$ | 5    | 3      | 2      | 0 <sup>-</sup> | 4399.7384        | -0.0195                          |
| 5                    | 4     | 1     | 0 <sup>-</sup> | $\leftarrow$ | 5    | 3      | 3      | 0 <sup>-</sup> | 4402.4668        | -0.0115                          |
| 8                    | 5     | 3     | 0 <sup>-</sup> | $\leftarrow$ | 8    | 4      | 5      | 0 <sup>-</sup> | 5651.9883        | 0.0031                           |
| 7                    | 5     | 3     | 0 <sup>-</sup> | $\leftarrow$ | 7    | 4      | 3      | 0 <sup>-</sup> | 5657.0295        | 0.0198                           |
| 7                    | 5     | 2     | 0 <sup>-</sup> | $\leftarrow$ | 7    | 4      | 4      | 0 <sup>-</sup> | 5657.4825        | -0.0010                          |
| $1^+ \leftarrow 1^+$ |       |       |                |              |      |        |        |                |                  |                                  |
| 7                    | 3     | 5     | 1 <sup>+</sup> | $\leftarrow$ | 7    | 2      | 5      | 1 <sup>+</sup> | 2927.2638        | 0.0152                           |
| 5                    | 3     | 3     | 1 <sup>+</sup> | $\leftarrow$ | 5    | 2      | 3      | 1 <sup>+</sup> | 3080.9560        | 0.0019                           |
| 9                    | 4     | 6     | 1 <sup>+</sup> | $\leftarrow$ | 9    | 3      | 6      | 1 <sup>+</sup> | 4307.7212        | 0.0009                           |
| 8                    | 4     | 5     | 1 <sup>+</sup> | $\leftarrow$ | 8    | 3      | 5      | 1 <sup>+</sup> | 4349.6042        | -0.0033                          |
| 7                    | 4     | 4     | 1 <sup>+</sup> | $\leftarrow$ | 7    | 3      | 4      | 1 <sup>+</sup> | 4375.7780        | 0.0043                           |
| 6                    | 4     | 3     | 1 <sup>+</sup> | $\leftarrow$ | 6    | 3      | 3      | 1 <sup>+</sup> | 4391.2035        | -0.0025                          |
| 8                    | 4     | 4     | 1 <sup>+</sup> | $\leftarrow$ | 8    | 3      | 6      | 1 <sup>+</sup> | 4394.0782        | -0.0047                          |
| 9                    | 4     | 5     | 1 <sup>+</sup> | $\leftarrow$ | 9    | 3      | 7      | 1 <sup>+</sup> | 4395.5751        | -0.0003                          |
| 7                    | 4     | 3     | 1 <sup>+</sup> | $\leftarrow$ | 7    | 3      | 5      | 1 <sup>+</sup> | 4396.1221        | 0.0010                           |
| 6                    | 4     | 2     | 1 <sup>+</sup> | $\leftarrow$ | 6    | 3      | 4      | 1 <sup>+</sup> | 4399.3663        | -0.0008                          |
| 5                    | 4     | 2     | 1 <sup>+</sup> | $\leftarrow$ | 5    | 3      | 2      | 1 <sup>+</sup> | 4399.8050        | -0.0106                          |
| 5                    | 4     | 1     | 1 <sup>+</sup> | $\leftarrow$ | 5    | 3      | 3      | 1 <sup>+</sup> | 4402.5126        | -0.0246                          |
| 8                    | 5     | 3     | 1 <sup>+</sup> | $\leftarrow$ | 8    | 4      | 5      | 1 <sup>+</sup> | 5651.9883        | 0.0031                           |
| 7                    | 5     | 3     | 1 <sup>+</sup> | $\leftarrow$ | 7    | 4      | 3      | 1 <sup>+</sup> | 5657.0295        | 0.0198                           |
| 7                    | 5     | 2     | 1 <sup>+</sup> | $\leftarrow$ | 7    | 4      | 4      | 1 <sup>+</sup> | 5657.4825        | -0.0010                          |

## References

- [1] D. Schmitz, V. Alvin Shubert, T. Betz, and M. Schnell, "Multi-resonance effects within a single chirp in broadband rotational spectroscopy: The rapid adiabatic passage regime for benzonitrile," *Journal of Molecular Spectroscopy*, vol. 280, pp. 77–84, Oct. 2012, doi: 10.1016/j.jms.2012.08.001.
- [2] C. Pérez, A. Krin, A. L. Steber, J. C. López, Z. Kisiel, and M. Schnell, "Wetting Camphor: Multi-Isotopic Substitution Identifies the Complementary Roles of Hydrogen Bonding and Dispersive Forces," *J. Phys. Chem. Lett.*, vol. 7, no. 1, pp. 154–160, Jan. 2016, doi: 10.1021/acs.jpcclett.5b02541.
- [3] D. Loru *et al.*, "How does the composition of a PAH influence its microsolvation? A rotational spectroscopy study of the phenanthrene–water and phenanthridine–water clusters," *Phys. Chem. Chem. Phys.*, vol. 23, no. 16, pp. 9721–9732, Apr. 2021, doi: 10.1039/D1CP00898F.

- [4] R. Meyer, "Flexible models for intramolecular motion, a versatile treatment and its application to glyoxal," *Journal of Molecular Spectroscopy*, vol. 76, no. 1, pp. 266–300, Jun. 1979, doi: 10.1016/0022-2852(79)90230-3.
